# Supplementary material for: Photo-driven reduction/cyclization of nitroarenes via electron donor–acceptor complexes: a novel method for the acquisition of N-heterocycles
Source: Royal Society of Chemistry journal article supplement (doi:10.1039/d4gc04082a), 2024-01-01

## Supplementary Information

### **Photo-driven reduction/cyclization of nitroarenes via electron donor-acceptor complexes: a novel acquisition for *N*-heterocycles**

Bin Sun,<sup>a</sup> Chun Lv,<sup>a</sup> Xiaohui Zhuang,<sup>a</sup> Yan Xu,<sup>a</sup> Haijing Song,<sup>a</sup> Jiayin Wang,<sup>a</sup> Zhaokang Zhang,<sup>a</sup> Jiayang Wang<sup>b</sup> and Can Jin<sup>\*a</sup>

<sup>a</sup> College of Pharmaceutical Sciences, Collaborative Innovation Center of Yangtze River Delta Region Green Pharmaceuticals, Key Laboratory for Green Pharmaceutical Technologies and Related Equipment of Ministry of Education, Zhejiang University of Technology, Hangzhou 310014, P. R. China.

<sup>b</sup> School of Life Sciences, Huzhou University, Huzhou, Zhejiang, PR China.

\*Corresponding author. Email: jincan@zjut.edu.cn

## *Table of Contents*

|                     |                                                         |
|---------------------|---------------------------------------------------------|
| <b>Page S1</b>      | <b>General Information</b>                              |
| <b>Page S2-S3</b>   | <b>Preparation of Substrate</b>                         |
| <b>Page S4-S5</b>   | <b>Optimization of the reaction conditions</b>          |
| <b>Page S6</b>      | <b>General procedure for cyclization of nitroarenes</b> |
| <b>Page S7-S9</b>   | <b>Application of the methodology</b>                   |
| <b>Page S10-S18</b> | <b>Mechanistic Investigation</b>                        |
| <b>Page S19-S38</b> | <b>Analytic Data of Products</b>                        |
| <b>Page S39</b>     | <b>Supplementary References</b>                         |
| <b>Page S40-S97</b> | <b>NMR Spectra</b>                                      |

## I. General Information

$^1\text{H}$  NMR,  $^{13}\text{C}$  NMR spectra were recorded on a Bruker AV 600 or AV 400 NMR spectrometer. Chemical shifts were reported in parts per million (ppm) and calibrated using residual undeuterated solvent as an internal reference ( $\text{CDCl}_3$ : 7.26 ppm  $^1\text{H}$  NMR, 77.0 ppm  $^{13}\text{C}$  NMR;  $\text{DMSO-}d_6$ : 2.50 ppm  $^1\text{H}$  NMR, 39.6 ppm  $^{13}\text{C}$  NMR). All high-resolution mass spectra (HRMS) were obtained on an Agilent 6545 LC/Q-TOF spectrometer. The UV-Vis measurements were carried out using a UV-Vis spectrophotometer (ULN 2209003, MAPADA P6). The thin layer chromatography (TLC) was performed using glass plates covered with  $\text{SiO}_2$ . Visualization was achieved by short wave (254 nm) ultraviolet light. Unless otherwise indicated, all reactions were carried out under air atmosphere at room temperature with magnetic stirring. All reagents were purchased from commercial source and without prior purification. Flash column chromatography was performed on silica gel (200-300 mesh) and the elution was performed with petroleum ether/ethyl acetate. The experiments were conducted in sealed 10 mL or 20 mL Schlenk tube.

Photochemical reactions were performed with a 100 W 390 nm LED purchased from Shanghai 3S Technology Co., Ltd (<https://www.3s-tech.net/en/#>).

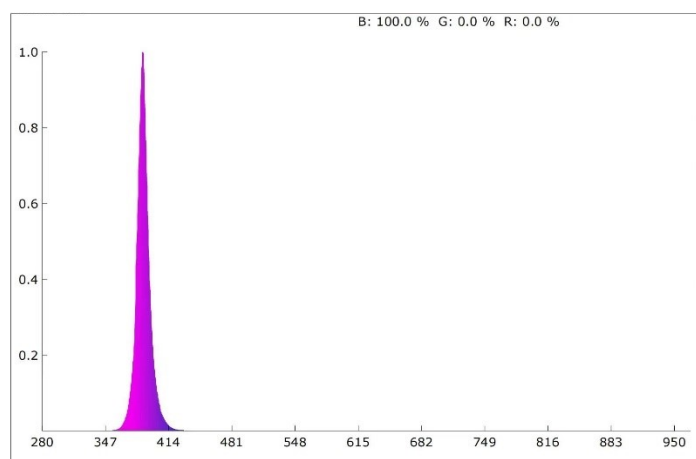

**Figure S1.** Emission spectrum of 100 W 390 nm LED strips. The maximum emission occurs at approximately 390 nm.

## II. Preparation of Substrate

### Synthesis of *N*-benzyl-2-nitroaniline derivatives

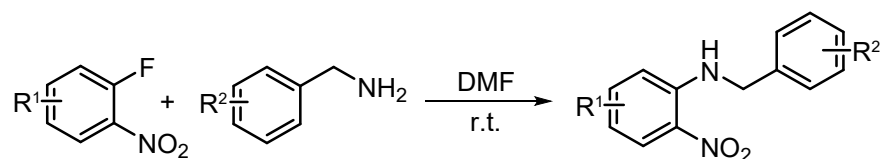

Prepared following a modified literature procedure.<sup>1</sup> To a suspension of 2-fluoronitroaniline (5 mmol, 1.0 equiv.) in DMF (10 mL), benzylamine (5 mmol, 1.0 equiv.) was added dropwise at room temperature. Stir the reaction mixture continuously until starting material is consumed as monitored by TLC. After that, the mixture was poured into H<sub>2</sub>O and extracted with EtOAc. The organic layer was then washed with aqueous LiCl, dried over Na<sub>2</sub>SO<sub>4</sub> and evaporated under reduced pressure to obtain the corresponding product **S1-S20**.

### Synthesis of 2-(2-nitrophenyl)-1,2,3,4-tetrahydroisoquinoline derivatives

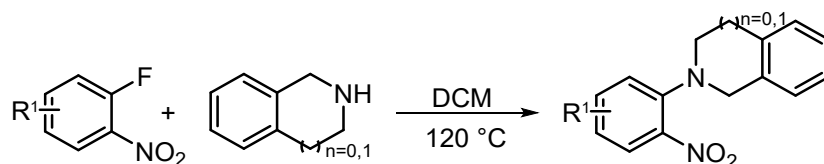

Prepared following a modified literature procedure.<sup>2</sup> Dissolve 2-fluoronitroaniline (5 mmol, 1.0 equiv.) in DCM (10 mL). Amine (15 mmol, 3.0 equiv.) was added dropwise at room temperature. The mixture was heated to reflux with 120 °C and stirred for 1 h. After that, the reaction mixture cooled to room temperature was diluted with H<sub>2</sub>O and DCM. The organic layer was then dried over Na<sub>2</sub>SO<sub>4</sub> and evaporated under reduced pressure to obtain the corresponding product **S21-S24**.

### Synthesis of cholesterol derivatives **S26**

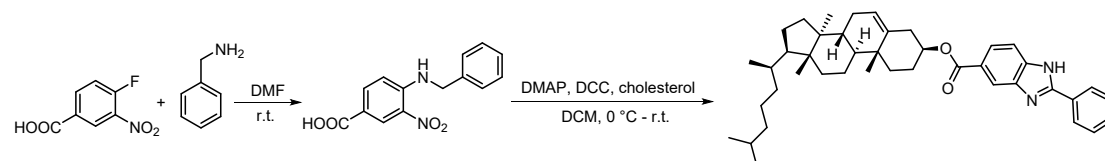

Prepared following modified literature procedures.<sup>1,3</sup> To a suspension of 4-fluoro-3-nitrobenzoic acid (5 mmol, 1.0 equiv.) in DMF (10 mL), benzylamine (5 mmol, 1.0 equiv.) was added dropwise at room temperature. Stir the reaction mixture continuously until starting material is consumed as monitored by TLC. After that, the mixture was poured into H<sub>2</sub>O and extracted with EtOAc. The organic layer was then washed with aqueous LiCl, dried over Na<sub>2</sub>SO<sub>4</sub> and evaporated under reduced pressure to obtain 4-(benzylamino)-3-nitrobenzoic acid. After that, to a solution of acid (4.0 mmol, 1.0 equiv.), cholesterol (4.0 mmol, 1.0 equiv.), DCC (8 mmol, 2.0 equiv.), DMAP (0.32 mmol, 8 mol%) was added in DCM at room temperature for 12 h. Then the reaction mixture was diluted with H<sub>2</sub>O and DCM. The organic layer was then dried over Na<sub>2</sub>SO<sub>4</sub> and evaporated under reduced pressure to obtain the corresponding product

S26.

#### Synthesis of (3,4-dihydroisoquinolin-2(1H)-yl)(2-nitrophenyl)methanone derivatives

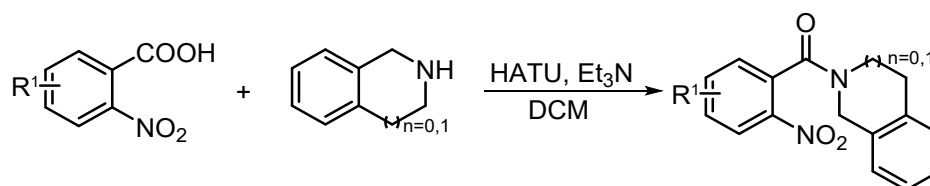

Prepared following a modified literature procedure.<sup>4</sup> To the solution of 2-nitrobenzoic acid (5 mmol, 1.0 equiv.) in DCM (10 mL), HATU (6 mmol, 1.2 equiv.) and Et<sub>3</sub>N (10 mmol, 2.0 equiv.) were added at room temperature. 15 min later, 1,2,3,4-tetrahydroisoquinoline derivatives (5.5 mmol, 1.1 equiv.) were added dropwise. Stir the reaction mixture continuously until starting material is consumed as monitored by TLC. After the completion of the reaction, the organic layer was washed with saturated NH<sub>4</sub>Cl solution, 1 M NaOH solution, saturated NaCl solution, and then dried over Na<sub>2</sub>SO<sub>4</sub>. The organic solvent was evaporated under reduced pressure. Purification by column chromatography on silica gel to obtain the corresponding product **S27-S29**.

#### Synthesis of *N*-substituted 2-nitrobenzamide derivatives

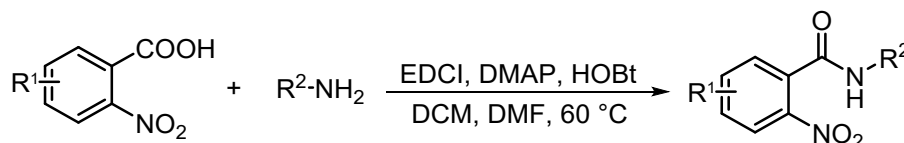

Prepared following a modified literature procedure.<sup>5</sup> To the solution of 2-nitrobenzoic acid (5 mmol, 1.0 equiv.) in DCM: DMF (25:1), EDCI (5.5 mmol, 1.1 equiv.), HOBt (5.5 mmol, 1.1 equiv.) and DMAP (0.25 mmol, 0.05 equiv.) were added at room temperature. Then amine (10 mmol, 2.0 equiv.) was added dropwise. The mixture was heated to reflux with 60 °C and stirred for 4 h. After that, the reaction mixture was poured into H<sub>2</sub>O and extracted with DCM. The organic layer was washed with saturated NaCl solution, dried over Na<sub>2</sub>SO<sub>4</sub> and evaporated under reduced pressure. Purification by column chromatography on silica gel to obtain the corresponding product **S30-S53**.

### III. Optimization of the reaction conditions

**Table S1.** Selected reaction optimization for benzimidazoles and polycyclic quinazolinones derivatives<sup>a,b</sup>

COc1ccc(cc1[N+](=O)[O-])NCc2ccccc2
→
COc1ccc2c(c1)[nH]c2Cc3ccccc3

**S1**
**1**

Amine, LED irradiation  
 Solvent, r.t., air  
 Reaction time

| Entry           | Amine      | Solvent          | Light source | Time (h) | Yield (%) <sup>b</sup> |
|-----------------|------------|------------------|--------------|----------|------------------------|
| 1               | Piperazine | DMSO             | 390 nm LED   | 48       | 75                     |
| 2 <sup>c</sup>  | Piperazine | DMSO             | 390 nm LED   | 48       | 34                     |
| 3 <sup>d</sup>  | Piperazine | DMSO             | 390 nm LED   | 48       | 51                     |
| 4 <sup>e</sup>  | Piperazine | DMSO             | 390 nm LED   | 48       | 74                     |
| 5               | TMEDA      | DMSO             | 390 nm LED   | 48       | 40                     |
| 6               | HTMP       | DMSO             | 390 nm LED   | 48       | 48                     |
| 7               | DIPEA      | DMSO             | 390 nm LED   | 48       | n.d.                   |
| 8               | Piperazine | DMSO             | 370 nm LED   | 48       | 69                     |
| 9               | Piperazine | DMSO             | 455 nm LED   | 48       | 65                     |
| 10              | Piperazine | DMF              | 390 nm LED   | 48       | 68                     |
| 11              | Piperazine | MeCN             | 390 nm LED   | 48       | 12                     |
| 12              | Piperazine | THF              | 390 nm LED   | 48       | 45                     |
| 13              | Piperazine | DCE              | 390 nm LED   | 48       | n.d.                   |
| 14              | Piperazine | H <sub>2</sub> O | 390 nm LED   | 48       | n.d.                   |
| 15              | Piperazine | Diox             | 390 nm LED   | 48       | n.d.                   |
| 16              | Piperazine | <i>i</i> -PrOH   | 390 nm LED   | 48       | n.d.                   |
| 17              | Piperazine | MeOH             | 390 nm LED   | 48       | n.d.                   |
| 18              | Piperazine | EA               | 390 nm LED   | 48       | n.d.                   |
| 19              | Piperazine | Acetone          | 390 nm LED   | 48       | 61                     |
| 20              | Piperazine | Ethyl formate    | 390 nm LED   | 48       | n.d.                   |
| 21              | Piperazine | DMSO             | 390 nm LED   | 12       | 45                     |
| 22              | Piperazine | DMSO             | 390 nm LED   | 36       | 63                     |
| 23              | None       | DMSO             | 390 nm LED   | 48       | Trace                  |
| 24 <sup>f</sup> | Piperazine | DMSO             | 390 nm LED   | 48       | 73                     |
| 25 <sup>g</sup> | Piperazine | DMSO             | In dark      | 48       | n.d.                   |

<sup>a</sup> Conditions: **S1** (0.3 mmol), amine (2.0 equiv.), DMSO (0.1 M), room temperature, air atmosphere, 48 h under 390 nm irradiation. <sup>b</sup> Isolated yields. <sup>c</sup> Piperazine (1.0 equiv.). <sup>d</sup> Piperazine (1.5 equiv.). <sup>e</sup> Piperazine (3.0 equiv.). <sup>f</sup> Nitrogen atmosphere. <sup>g</sup> The tube was wrapped with tin foil to ensure that the reaction was performed in darkness while keeping all other variables constant.

**Table S2.** Selected reaction optimization for quinazolin-4(3*H*)-one derivatives<sup>a,b</sup>

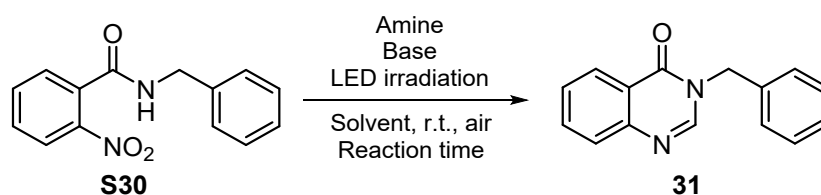

| Entry           | Amine | Base                            | Solvent                             | Light source | Time (h) | Yield (%) <sup>b</sup> |
|-----------------|-------|---------------------------------|-------------------------------------|--------------|----------|------------------------|
| 1               | TMEDA | Na <sub>3</sub> PO <sub>4</sub> | DMSO/H <sub>2</sub> O (3 mL/0.5 mL) | 390 nm LED   | 24       | 86                     |
| 2 <sup>c</sup>  | TMEDA | Na <sub>3</sub> PO <sub>4</sub> | DMSO/H <sub>2</sub> O (3 mL/0.5 mL) | 390 nm LED   | 24       | 43                     |
| 3 <sup>d</sup>  | TMEDA | Na <sub>3</sub> PO <sub>4</sub> | DMSO/H <sub>2</sub> O (3 mL/0.5 mL) | 390 nm LED   | 24       | 62                     |
| 4 <sup>e</sup>  | TMEDA | Na <sub>3</sub> PO <sub>4</sub> | DMSO/H <sub>2</sub> O (3 mL/0.5 mL) | 390 nm LED   | 24       | 84                     |
| 5               | DIPEA | Na <sub>3</sub> PO <sub>4</sub> | DMSO/H <sub>2</sub> O (3 mL/0.5 mL) | 390 nm LED   | 24       | 41                     |
| 6               | DBU   | Na <sub>3</sub> PO <sub>4</sub> | DMSO/H <sub>2</sub> O (3 mL/0.5 mL) | 390 nm LED   | 24       | n.d.                   |
| 7 <sup>f</sup>  | TMEDA | Na <sub>3</sub> PO <sub>4</sub> | DMSO/H <sub>2</sub> O (3 mL/0.5 mL) | 390 nm LED   | 24       | 52                     |
| 8 <sup>g</sup>  | TMEDA | Na <sub>3</sub> PO <sub>4</sub> | DMSO/H <sub>2</sub> O (3 mL/0.5 mL) | 390 nm LED   | 24       | 79                     |
| 9 <sup>h</sup>  | TMEDA | Na <sub>3</sub> PO <sub>4</sub> | DMSO/H <sub>2</sub> O (3 mL/0.5 mL) | 390 nm LED   | 24       | 84                     |
| 10              | TMEDA | K <sub>3</sub> PO <sub>4</sub>  | DMSO/H <sub>2</sub> O (3 mL/0.5 mL) | 390 nm LED   | 24       | 78                     |
| 11              | TMEDA | Cs <sub>2</sub> CO <sub>3</sub> | DMSO/H <sub>2</sub> O (3 mL/0.5 mL) | 390 nm LED   | 24       | 85                     |
| 12              | TMEDA | K <sub>2</sub> CO <sub>3</sub>  | DMSO/H <sub>2</sub> O (3 mL/0.5 mL) | 390 nm LED   | 24       | 67                     |
| 13              | TMEDA | Na <sub>2</sub> CO <sub>3</sub> | DMSO/H <sub>2</sub> O (3 mL/0.5 mL) | 390 nm LED   | 24       | 42                     |
| 14              | TMEDA | <i>t</i> -BuOK                  | DMSO/H <sub>2</sub> O (3 mL/0.5 mL) | 390 nm LED   | 24       | n.d.                   |
| 15              | TMEDA | Na <sub>3</sub> PO <sub>4</sub> | DMSO                                | 390 nm LED   | 24       | 64                     |
| 16              | TMEDA | Na <sub>3</sub> PO <sub>4</sub> | DMF                                 | 390 nm LED   | 24       | 62                     |
| 17              | TMEDA | Na <sub>3</sub> PO <sub>4</sub> | MeCN                                | 390 nm LED   | 24       | 59                     |
| 18              | TMEDA | Na <sub>3</sub> PO <sub>4</sub> | THF                                 | 390 nm LED   | 24       | 37                     |
| 19              | TMEDA | Na <sub>3</sub> PO <sub>4</sub> | H <sub>2</sub> O                    | 390 nm LED   | 24       | n.d.                   |
| 20              | TMEDA | Na <sub>3</sub> PO <sub>4</sub> | Acetone                             | 390 nm LED   | 24       | 61                     |
| 21              | TMEDA | Na <sub>3</sub> PO <sub>4</sub> | EA                                  | 390 nm LED   | 24       | 53                     |
| 22              | TMEDA | Na <sub>3</sub> PO <sub>4</sub> | DCM                                 | 390 nm LED   | 24       | 43                     |
| 23              | TMEDA | Na <sub>3</sub> PO <sub>4</sub> | DMSO/H <sub>2</sub> O (3 mL/0.5 mL) | 390 nm LED   | 12       | 59                     |
| 24              | TMEDA | Na <sub>3</sub> PO <sub>4</sub> | DMSO/H <sub>2</sub> O (3 mL/0.5 mL) | 370 nm LED   | 24       | 74                     |
| 25              | TMEDA | Na <sub>3</sub> PO <sub>4</sub> | DMSO/H <sub>2</sub> O (3 mL/0.5 mL) | 455 nm LED   | 24       | n.d.                   |
| 26              | TMEDA | None                            | DMSO/H <sub>2</sub> O (3 mL/0.5 mL) | 390 nm LED   | 24       | Trace                  |
| 27              | None  | Na <sub>3</sub> PO <sub>4</sub> | DMSO/H <sub>2</sub> O (3 mL/0.5 mL) | 390 nm LED   | 24       | n.d.                   |
| 28 <sup>i</sup> | TMEDA | Na <sub>3</sub> PO <sub>4</sub> | DMSO/H <sub>2</sub> O (3 mL/0.5 mL) | 390 nm LED   | 24       | 82                     |
| 29 <sup>j</sup> | TMEDA | Na <sub>3</sub> PO <sub>4</sub> | DMSO/H <sub>2</sub> O (3 mL/0.5 mL) | In dark      | 24       | n.d.                   |

<sup>a</sup> Conditions: **S30** (0.3 mmol), amine (2.0 equiv.), base (2.0 equiv.), DMSO (0.1 M), H<sub>2</sub>O (0.6 M), room temperature, air atmosphere, 24 h under 390 nm irradiation. <sup>b</sup> Isolated yields. <sup>c</sup> TMEDA (1.0 equiv.). <sup>d</sup> TMEDA (1.5 equiv.). <sup>e</sup> TMEDA (3.0 equiv.). <sup>f</sup> Na<sub>3</sub>PO<sub>4</sub> (1.0 equiv.). <sup>g</sup> Na<sub>3</sub>PO<sub>4</sub> (1.5 equiv.). <sup>h</sup> Na<sub>3</sub>PO<sub>4</sub> (3.0 equiv.). <sup>i</sup> Nitrogen atmosphere. <sup>j</sup> The tube was wrapped with tin foil to ensure that the reaction was performed in darkness while keeping all other variables constant.

#### IV. General procedure for cyclization of nitroarenes

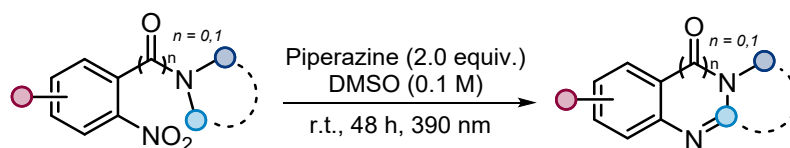

**Procedure A:** To a 10 mL oven-dried Schlenk tube equipped with a magnetic stir bar was added the corresponding nitroarenes (0.3 mmol, 1.0 equiv.), piperazine (0.6 mmol, 2.0 equiv.) and DMSO (3 mL). The resulting solution was stirred under irradiation of a 100 W 390 nm LED for 48 h. After completion of the reaction, the reaction mixture was quenched with H<sub>2</sub>O, poured into a separatory funnel, and extracted with EtOAc. The combined organic layers were dried over Na<sub>2</sub>SO<sub>4</sub> and concentrated under reduced pressure. The residue was purified via silica gel chromatography to give the corresponding products **1-30**.

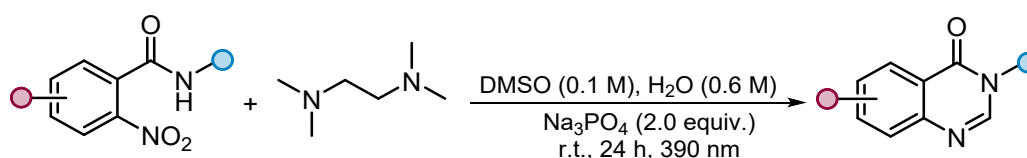

**Procedure B:** To a 10 mL oven-dried Schlenk tube equipped with a magnetic stir bar was added the corresponding nitroarenes (0.3 mmol, 1.0 equiv.), *N,N,N',N'*-tetramethylethylenediamine (i.e. TMEDA, 0.6 mmol, 2.0 equiv.), Na<sub>3</sub>PO<sub>4</sub> (0.6 mmol, 2.0 equiv.), H<sub>2</sub>O (0.5 mL) and DMSO (3 mL). The resulting solution was stirred under irradiation of a 100 W 390 nm LED for 24 h. After completion of the reaction, the reaction mixture was quenched with H<sub>2</sub>O, poured into a separatory funnel, and extracted with EtOAc. The combined organic layers were dried over Na<sub>2</sub>SO<sub>4</sub> and concentrated under reduced pressure. The residue was purified via silica gel chromatography to give the corresponding products **31-54**.

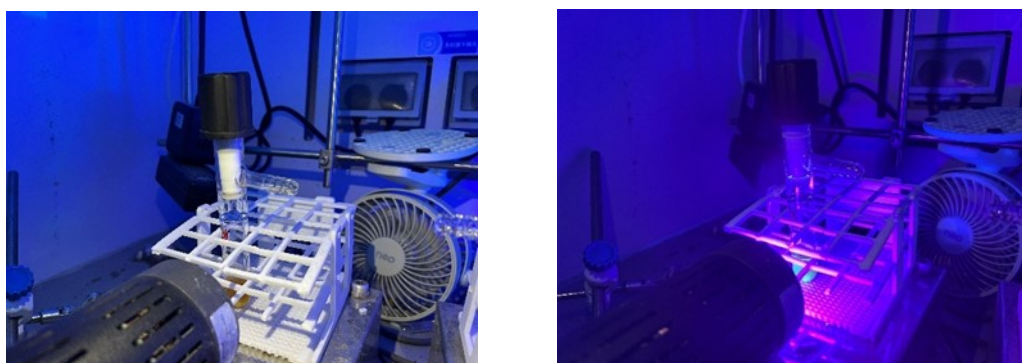

Figure S2. Reaction vessel and reaction set-up (0.3 mmol scale).



## V. Application of the methodology

### (1) Gram-scale synthesis

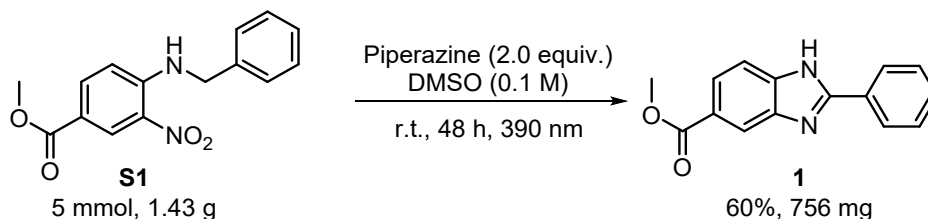

To a dry 100 mL round-bottom flask was added methyl 4-(benzylamino)-3-nitrobenzoate (5 mmol, 1.0 equiv.), piperazine (10 mmol, 2.0 equiv.) and 50 mL DMSO under air atmosphere. The resulting solution was stirred under irradiation of 100 W 390 nm LEDs for 48 h. On completion, the reaction mixture was quenched with H<sub>2</sub>O, poured into a separatory funnel, and extracted with EtOAc. The combined organic layers were dried over Na<sub>2</sub>SO<sub>4</sub> and concentrated under reduced pressure. Purification by flash column chromatography gave the compound **1** as yellow solid (756 mg, 60% yield).

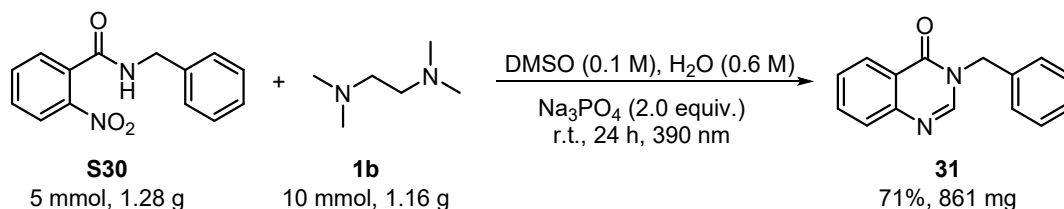

To a dry 100 mL round-bottom flask was added *N*-benzyl-2-nitrobenzamide (5 mmol, 1.0 equiv.), TMEDA (10 mmol, 2.0 equiv.), Na<sub>3</sub>PO<sub>4</sub> (10 mmol, 2.0 equiv.), 50 mL DMSO and 8.3 mL H<sub>2</sub>O under air atmosphere. The resulting solution was stirred under irradiation of 100 W 390 nm LEDs for 24 h. On completion, the reaction mixture was quenched with H<sub>2</sub>O, poured into a separatory funnel, and extracted with EtOAc. The combined organic layers were dried over Na<sub>2</sub>SO<sub>4</sub> and concentrated under reduced pressure. Purification by flash column chromatography gave the compound **31** as white solid (838 mg, 71% yield).

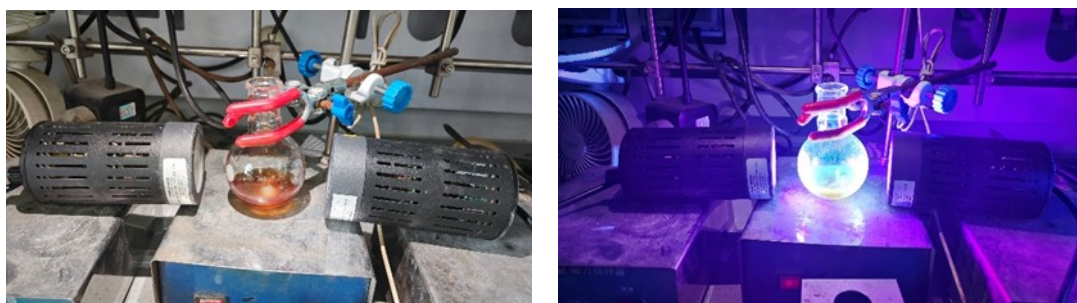

**Figure S3.** Reaction vessel and reaction set-up (gram scale).

## (2) Extend-scale using continuous-flow reactor

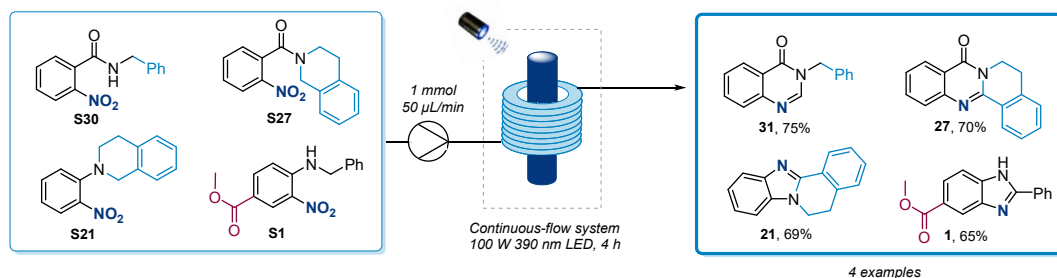

To a dry 50 mL round-bottom flask was added *N*-benzyl-2-nitrobenzamide (1 mmol, 1.0 equiv.), TMEDA (2 mmol, 2.0 equiv.),  $\text{Na}_3\text{PO}_4$  (2 mmol, 2.0 equiv.), 10 mL DMSO and 1.7 mL  $\text{H}_2\text{O}$ . The resulting solution was stirred under air atmosphere, transferred to a 5 mL syringe and then placed on a syringe pump set at a flow rate of 50  $\mu\text{L}/\text{min}$ . Later, the mixture was introduced into feeding tubes under irradiation of 100 W 390 nm LEDs. Due to the capacity limitation of the syringe and feeding tubes, the reaction was prepared twice with 5 mL reaction mixture each time, and the total reaction time was 4 h. On completion, the reaction mixture was quenched with  $\text{H}_2\text{O}$ , poured into a separatory funnel, and extracted with EtOAc. The combined organic layers were dried over  $\text{Na}_2\text{SO}_4$  and concentrated under reduced pressure. Purification by flash column chromatography gave the compound **31** (172 mg, 75% yield). Other substrates are similar to the above experimental steps.

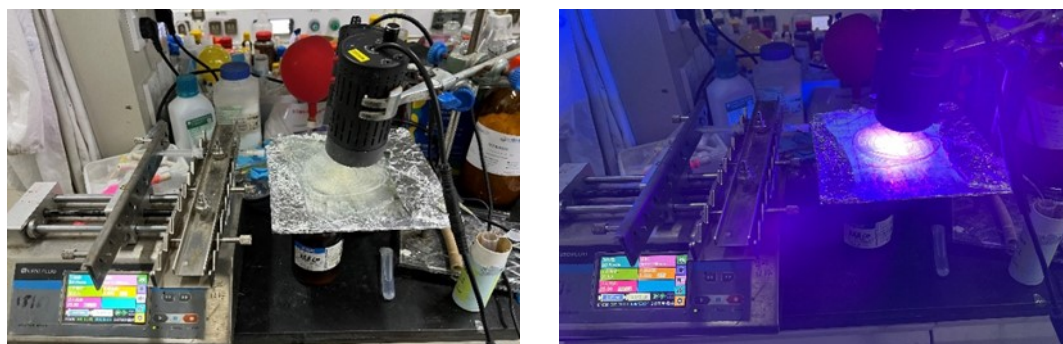

Figure S4. Reaction vessel and reaction set-up (flow chemistry).

## (3) Synthesis of drug<sup>6</sup>

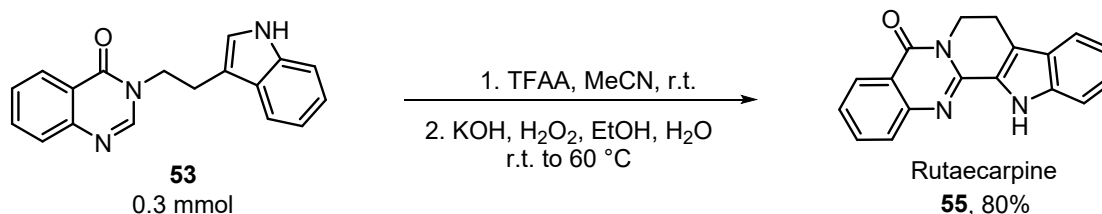

To a dry 25 mL round-bottom flask was added 3-(2-(1*H*-indol-3-yl)ethyl)quinazolin-4(3*H*)-one **53** (0.3 mmol, 1.0 equiv.), TFAA (1.5 mmol, 5.0 equiv.) and 3 mL MeCN under air atmosphere. The reaction mixture was stirred at room temperature for 0.5 h, and solid was filtered in suspension. After then, add

KOH (0.6 mmol, 2.0 equiv.), H<sub>2</sub>O<sub>2</sub> (30% in H<sub>2</sub>O, 0.75 mL) to a solution of the solid in H<sub>2</sub>O/EtOH (1:2, 3 mL). The resulting solution was stirred at room temperature for 0.5 h and proceeded at 60 °C overnight until it was cooled to room temperature and quenched by saturated NaHCO<sub>3</sub> solution. The mixture was then extracted with EtOAc. The combined organic layer was washed with brine, dried over Na<sub>2</sub>SO<sub>4</sub>, filtered and evaporated. Purification by column chromatography gave the product Rutaecarpine **55** as white solid (68.9 mg, 80% yield).

## VI. Mechanistic Investigation

### (1) HRMS Analysis for Proposed Intermediates

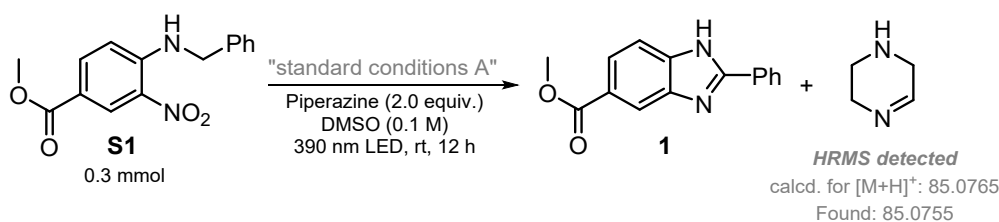

To a 10 mL oven-dried Schlenk tube equipped with a magnetic stir bar was added the corresponding nitroarenes (0.3 mmol, 1.0 equiv.), piperazine (0.6 mmol, 2.0 equiv.) and DMSO (3 mL). The resulting solution was stirred under irradiation of a 100 W 390 nm LED for 12 h. After completion of the reaction, the reaction mixture was detected via HRMS. Evidently, the by-product of dehydrogenated piperazine was detected by HRMS.

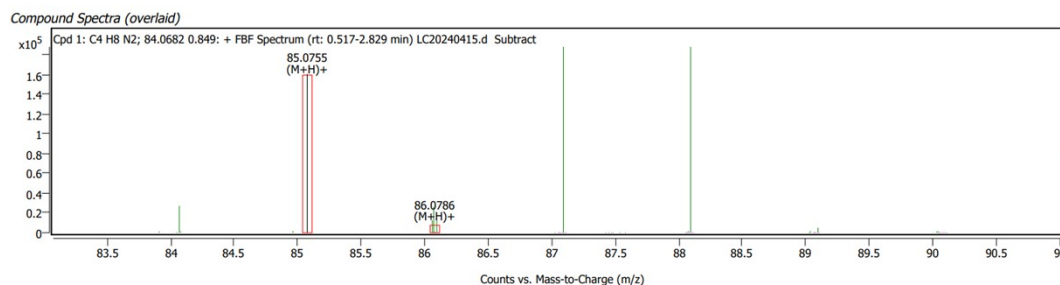

**Figure S5.** HRMS data of by-product of dehydrogenated piperazine.

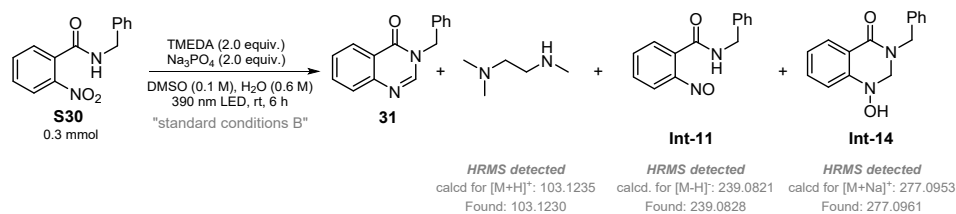

To a 10 mL oven-dried Schlenk tube equipped with a magnetic stir bar was added the corresponding nitroarenes (0.3 mmol, 1.0 equiv.), TMEDA (0.6 mmol, 2.0 equiv.), Na<sub>3</sub>PO<sub>4</sub> (0.6 mmol, 2.0 equiv.), H<sub>2</sub>O (0.5 mL) and DMSO (3 mL). The resulting solution was stirred under irradiation of a 100 W 390 nm LED for 6 h. After completion of the reaction, the reaction mixture was detected via HRMS. Evidently, the proposed intermediates were detected by HRMS.

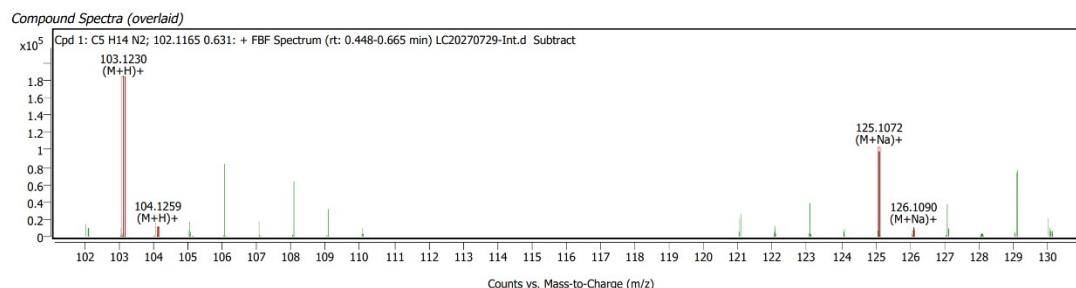

**Figure S6.** HRMS data of the by-product of TMEDA hydrolysis.

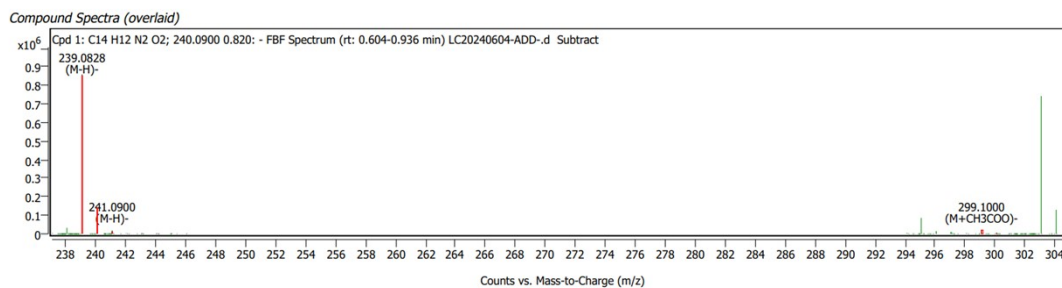

**Figure S7.** HRMS data of Int-11.

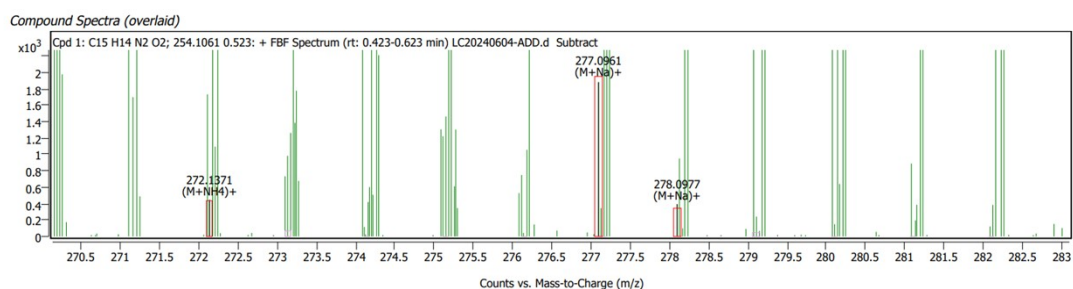

**Figure S8.** HRMS data of Int-14.

## (2) UV-vis spectra

The UV-vis absorption spectrum is an effective means of directly representing the electronic properties of compounds and is often used to detect the presence of electron donor-acceptor (EDA) complexes in photochemical reactions.<sup>7</sup> In this part, UV-vis spectra of **S1**, **1a** and their 1:2 mixture (the molar ratio was in consistency with the reaction mixture) were recorded with a MAPADA P6 spectrophotometer. As shown in Figure S10, the 1:2 mixture of **S1** and **1a** exhibited a bathochromic shift, indicating the occurrence of EDA complexes during the reaction.

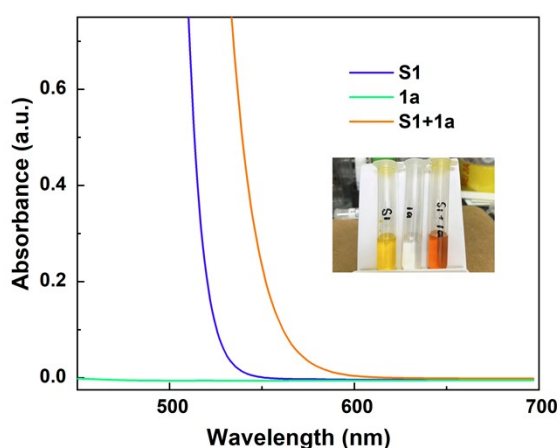

**Figure S9.** UV-vis absorption spectra of individual reaction components and a combination thereof. All spectra were measured in DMSO with a concentration of 0.1 M **S1**, 0.2 M **1a**.

Next, Absorption spectra of individual reaction components (**S30**, **1b**) and mixtures thereof were recorded. A bathochromic shift was observed for a mixture of **S30** and **1b**, which indicated the formation of EDA complexes. Moreover, there was a more pronounced redshift of the mixed solution occurred when  $\text{Na}_3\text{PO}_4$  was added, implying that the base promoted the formation of EDA complexes between **S30** and **1b**.

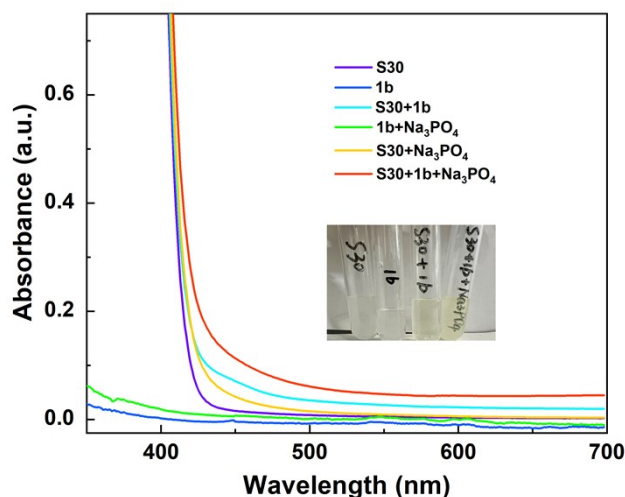

**Figure S10.** UV/vis absorption spectra of individual reaction components and a combination thereof. All spectra were measured in DMSO with a concentration of 0.1 M **S30**, 0.2 M **1b**, 10 mg  $\text{Na}_3\text{PO}_4$ .

### (3) Control experiments

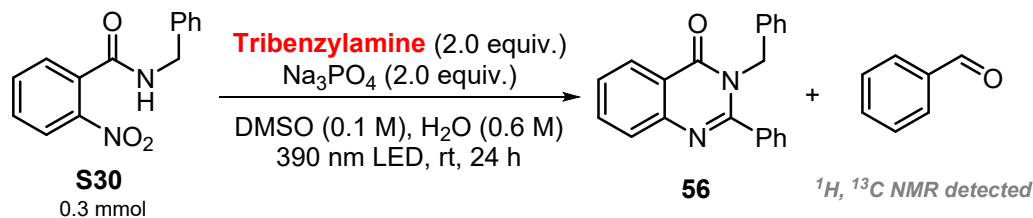

To a 10 mL oven-dried Schlenk tube equipped with a magnetic stir bar was added the corresponding nitroarenes (0.3 mmol, 1.0 equiv.), tribenzylamine (0.6 mmol, 2.0 equiv.),  $\text{Na}_3\text{PO}_4$  (0.6 mmol, 2.0 equiv.),  $\text{H}_2\text{O}$  (0.5 mL) and DMSO (3 mL). The resulting solution was stirred under irradiation of a 100 W 390 nm LED for 24 h. After completion of the reaction, the reaction mixture was quenched with  $\text{H}_2\text{O}$ , poured into a separatory funnel, and extracted with EtOAc. The combined organic layers were dried over  $\text{Na}_2\text{SO}_4$  and concentrated under reduced pressure. The residue was purified via silica gel chromatography to give the corresponding product **56** and benzaldehyde, proving that amines serve as C1 synthons during the reaction.

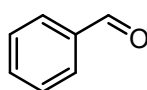

$^1\text{H}$  NMR (400 MHz,  $\text{CDCl}_3$ )  $\delta$  10.02 (s, 1H), 7.90 – 7.86 (m, 2H), 7.66 – 7.60 (m, 1H), 7.53 (t,  $J = 7.5$  Hz, 2H).

$^{13}\text{C}$  NMR (100 MHz,  $\text{CDCl}_3$ )  $\delta$  192.44, 136.42, 134.51, 129.78, 129.03.

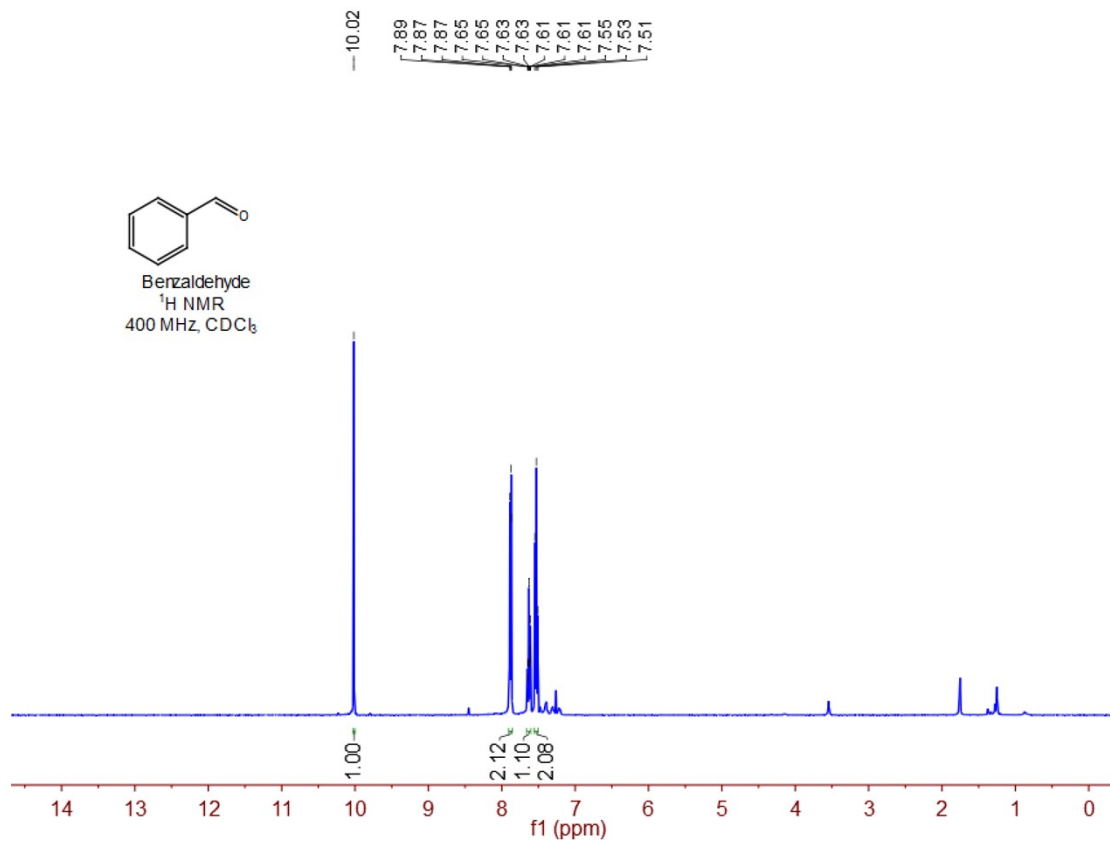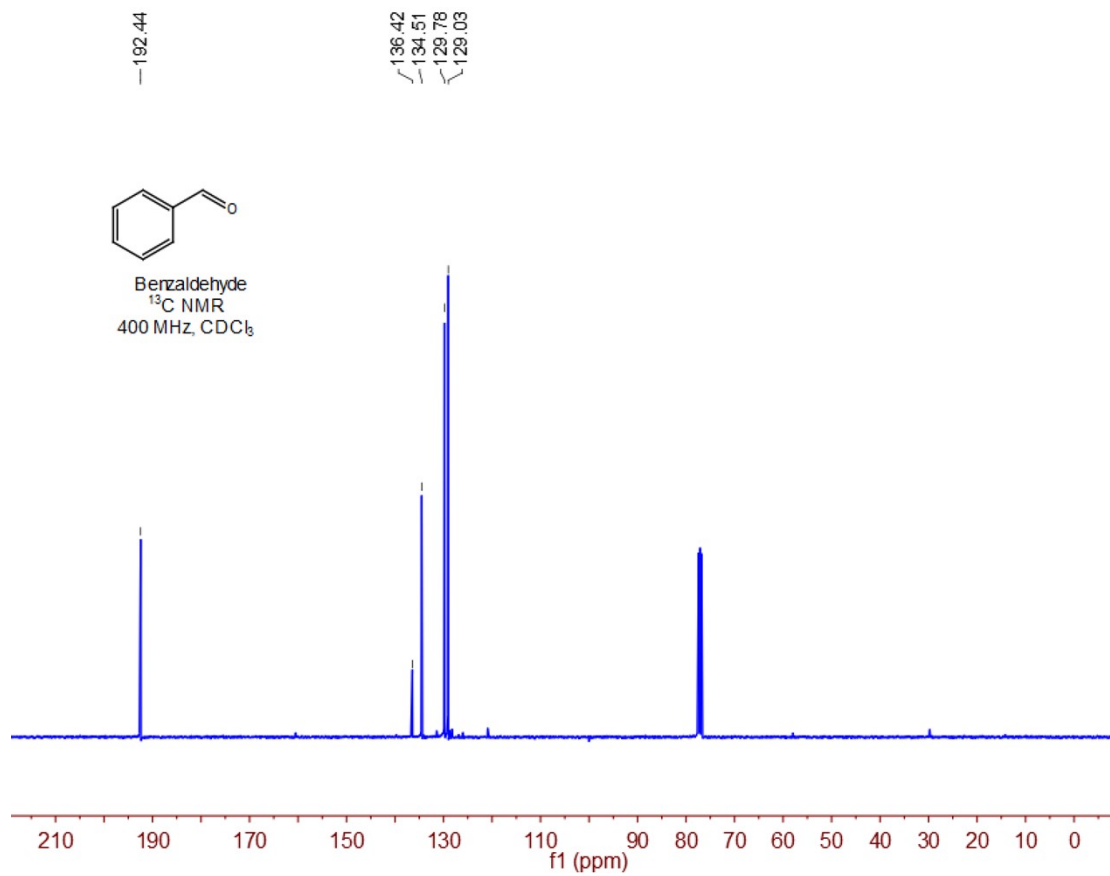

**(4) Light on/off experiments**

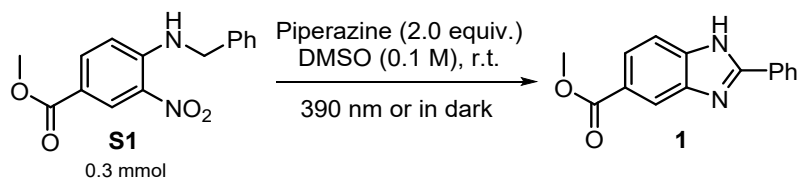

Five parallel reactions were performed between methyl 4-(benzylamino)-3-nitrobenzoate **S1** (0.3 mmol, 1.0 equiv.), piperazine **1a** (0.6 mmol, 2.0 equiv.) according to the procedure A. The yield of **1** was recorded at specified time intervals. The light irradiation was represented by the white area, while the blue area indicates the duration in darkness.

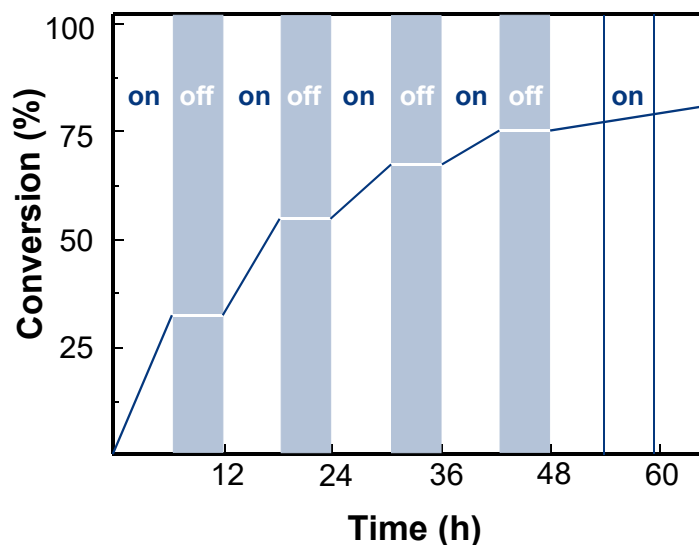

**Figure S11.** Light on/off experiments of **1**.

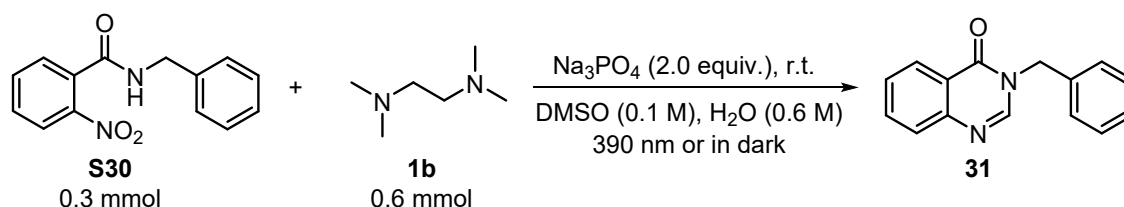

Five parallel reactions were performed between *N*-benzyl-2-nitrobenzamide **S30** (0.3 mmol, 1.0 equiv.), TMEDA **1b** (0.6 mmol, 2.0 equiv.) according to the procedure B. The yield of **31** was recorded at specified time intervals. The light irradiation was represented by the white area, while the red area indicates the duration in darkness.



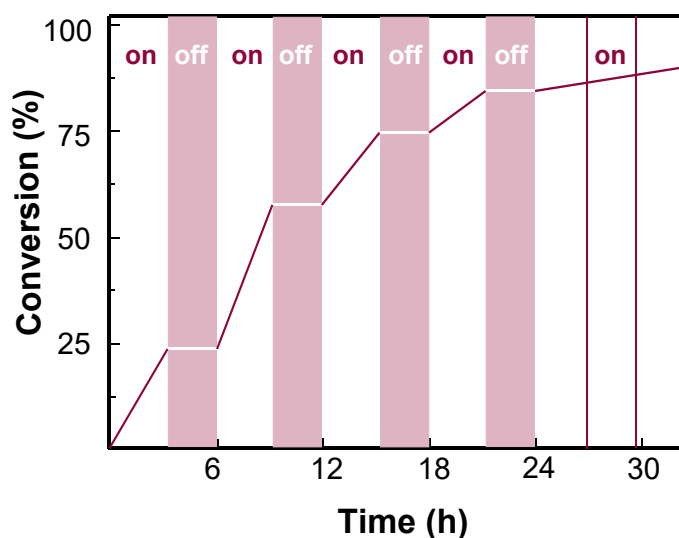

**Figure S12.** Light on/off experiments of **31**.

### (5) Calculations of green chemistry metrics

In recent years, the importance of sustainability has been steadily increasing. EcoScale is a semi-quantitative tool for selecting green reagents based on economic and ecological parameters. In this part, we selected some reported strategies as control groups, and systematically evaluated the EcoScales of our strategy and control groups in terms of six parameters including yield, price of reaction components, safety, technical setup, temperature/time, workup and purification. Our strategy received EcoScale scores of 66.5 and 72, which is deemed acceptable regarding sustainability.

**EcoScale = 100 - sum of individual penalties**

**Score on Eco Scale: > 75, Excellent; > 50, Acceptable; < 50, Inadequate**

**Table S3.** Calculation of Ecoscale score for this work (Conditions A)

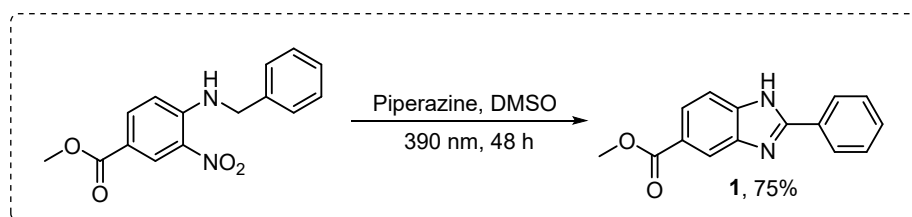

**A. Calculation of Penalty Points:**

| Parameters                                                                        | Penalty Points |
|-----------------------------------------------------------------------------------|----------------|
| 1. Yield: (100- % of yield)/2 = (100-75)/2                                        | <b>12.5</b>    |
| 2. Price of reaction components (To obtain 10 mmol of end product, <b>1</b> )     |                |
| a. methyl 4-fluoro-3-nitrobenzoate = 13.3 mmol = 2.65 g = USD 1.0                 |                |
| b. benzylamine = 13.3 mmol = 1.42 g = USD 0.2                                     |                |
| c. piperazine = 26.6 mmol = 2.29 g = USD 0.18                                     |                |
| Total cost of synthesis of <b>1</b> = (1.0 + 0.2 + 0.18) = USD 1.38               |                |
| Thus inexpensive, since (total cost of synthesis of 10 mmol of <b>1</b> ) < \$10: | <b>0</b>       |
| 3. Safety                                                                         |                |
| Piperazine (T)                                                                    | <b>5</b>       |
| 4. Technical Setup                                                                |                |
| Photochemical activation                                                          | <b>2</b>       |
| 5. Temperature/time                                                               |                |
| Room temperature, 48 h                                                            | <b>1</b>       |
| 6. Workup and purification                                                        |                |
| Liquid-liquid extraction                                                          | <b>3</b>       |
| Classical chromatography                                                          | <b>10</b>      |
| <b>Total penalty points:</b>                                                      | <b>33.5</b>    |

**B. Ecoscale calculation:**

**EcoScale score:** (100-33.5) = **66.5 (> 50; it is an acceptable synthesis)**

**Table S4.** Calculation of Ecoscale score for this work (Conditions B)

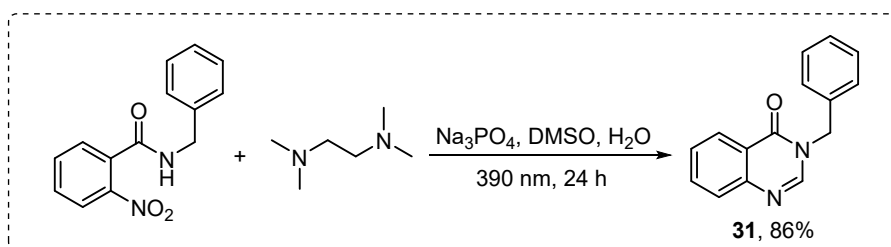

**A. Calculation of Penalty Points:**

| Parameters                                                                                         | Penalty Points |
|----------------------------------------------------------------------------------------------------|----------------|
| 1. Yield: (100- % of yield)/2 = (100-86)/2                                                         | 7              |
| 2. Price of reaction components (To obtain 10 mmol of end product, <b>31</b> )                     |                |
| a. 2-nitrobenzoic acid = 11.6 mmol = 1.94 g = USD 0.14                                             |                |
| b. benzylamine = 23.2 mmol = 2.48 g = USD 0.35                                                     |                |
| c. EDCI = 12.76 mmol = 2.40 g = USD 0.43                                                           |                |
| d. HOBT = 12.76 mmol = 1.72 g = USD 1.08                                                           |                |
| e. DMAP = 0.58 mmol = 0.071 g = USD 0.004                                                          |                |
| f. TMEDA = 23.2 mmol = 2.7 g = USD 0.6                                                             |                |
| g. Na <sub>3</sub> PO <sub>4</sub> = 23.2 mmol = 3.8 g = USD 0.19                                  |                |
| Total cost of synthesis of <b>31</b> = (0.14 + 0.35 + 0.43 + 1.08 + 0.004 + 0.6 + 0.19) = USD 2.79 |                |
| Thus inexpensive, since (total cost of synthesis of 10 mmol of <b>31</b> ) < \$10:                 | 0              |
| 3. Safety                                                                                          |                |
| DMAP (T)                                                                                           | 5              |
| 4. Technical Setup                                                                                 |                |
| Room temperature, 24 h                                                                             | 2              |
| 5. Temperature/time                                                                                |                |
| Heating (120 °C), 24 h                                                                             | 1              |
| 6. Workup and purification                                                                         |                |
| Liquid-liquid extraction                                                                           | 3              |
| Classical chromatography                                                                           | 10             |
| <b>Total penalty points:</b>                                                                       | <b>28</b>      |

**B. Ecoscale calculation:**

**EcoScale score:** (100-28) = 72 (> 50; it is an acceptable synthesis)

**Table S5.** Calculation of Ecoscale score for control groups<sup>8-11</sup>

| Number            | Strategy                                                                            | EcoScale |
|-------------------|-------------------------------------------------------------------------------------|----------|
| I <sup>8</sup>    | 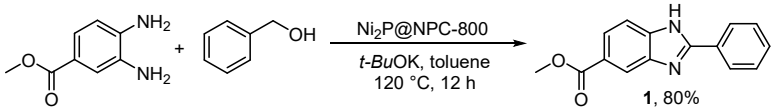  | 50       |
| II <sup>9</sup>   |   | 55       |
| III <sup>10</sup> |   | 66.5     |
| IV <sup>11</sup>  |  | 68.5     |

## VII. Analytic Data of Products (reactions was conducted at 0.3 mmol scale).

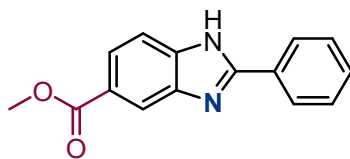

1

### methyl 2-phenyl-1H-benzo[d]imidazole-5-carboxylate

The product was purified by column chromatography on silica gel (eluent: 3:1 petroleum ether: ethyl acetate) as a yellow solid (57 mg, 75%).

$^1\text{H NMR}$  (400 MHz,  $\text{DMSO-}d_6$ )  $\delta$  13.29 (s, 1H), 8.22 – 8.20 (m, 3H), 7.85 (d,  $J = 8.2$  Hz, 1H), 7.68 (s, 1H), 7.61 – 7.52 (m, 3H), 3.88 (s, 3H).

$^{13}\text{C NMR}$  (100 MHz,  $\text{DMSO-}d_6$ )  $\delta$  166.85, 154.87, 147.26, 143.49, 138.64, 130.59, 129.62, 129.17, 126.87, 123.84, 123.52, 112.77, 111.47, 52.12.

(Known compound: *ChemistrySelect*, 2021, **6**, 8080-8084).

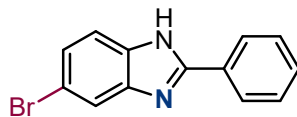

2

### 5-bromo-2-phenyl-1H-benzo[d]imidazole

The product was purified by column chromatography on silica gel (eluent: 5:1 petroleum ether: ethyl acetate) as a white solid (55 mg, 68%).

$^1\text{H NMR}$  (400 MHz,  $\text{DMSO-}d_6$ )  $\delta$  13.13 (s, 1H), 8.17 (d,  $J = 6.9$  Hz, 2H), 7.79 (s, 1H), 7.58 – 7.50 (m, 4H), 7.34 (dd,  $J = 8.5, 1.7$  Hz, 1H).

$^{13}\text{C NMR}$  (100 MHz,  $\text{DMSO-}d_6$ )  $\delta$  152.54, 144.48, 130.34, 129.71, 129.12, 126.68, 125.07, 117.99, 114.33.

(Known compound: *Synlett.*, 2019, **30**, 319-324).

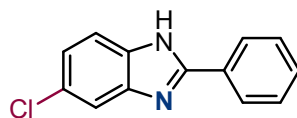

3

### 5-chloro-2-phenyl-1H-benzo[d]imidazole

The product was purified by column chromatography on silica gel (eluent: 5:1 petroleum ether: ethyl acetate) as a white solid (44 mg, 64%).

$^1\text{H NMR}$  (400 MHz,  $\text{DMSO-}d_6$ )  $\delta$  13.13 (s, 1H), 8.19 (d,  $J = 7.0$  Hz, 2H), 7.77 – 7.47 (m, 5H), 7.23 (d,  $J = 8.2$  Hz, 1H).

$^{13}\text{C NMR}$  (100 MHz,  $\text{DMSO-}d_6$ )  $\delta$  152.79, 130.28, 129.79, 129.09, 126.67, 122.64.

(Known compound: *Green Chem.*, 2019, **21**, 6154-6160).

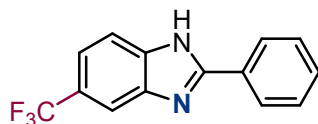

S19

**2-phenyl-5-(trifluoromethyl)-1H-benzo[d]imidazole**

The product was purified by column chromatography on silica gel (eluent: 3:1 petroleum ether: ethyl acetate) as a yellow solid (56 mg, 72%).

<sup>1</sup>H NMR (400 MHz, DMSO-*d*<sub>6</sub>) δ 13.38 (s, 1H), 8.24 – 8.21 (m, 2H), 8.03 – 7.78 (m, 2H), 7.62 – 7.53 (m, 4H).

<sup>13</sup>C NMR (100 MHz, DMSO-*d*<sub>6</sub>) δ 154.36, 131.02, 129.89, 129.54, 127.26, 126.88, 124.18, 123.17 (C-F, *J* = 31.5 Hz), 119.37.

<sup>19</sup>F NMR (376 MHz, DMSO-*d*<sub>6</sub>) δ -58.87.

(Known compound: *Molecular Catalysis.*, 2024, **561**, 114159-114168).

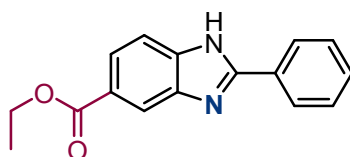

5

**ethyl 2-phenyl-1H-benzo[d]imidazole-5-carboxylate**

The product was purified by column chromatography on silica gel (eluent: 2:1 petroleum ether: ethyl acetate) as a yellow solid (59 mg, 74%).

<sup>1</sup>H NMR (400 MHz, DMSO-*d*<sub>6</sub>) δ 13.27 (s, 1H), 8.28 (s, 1H), 8.20 (d, *J* = 7.3 Hz, 2H), 7.85 (dd, *J* = 15.8, 8.3 Hz, 1H), 7.75 (d, *J* = 7.9 Hz, 1H), 7.63 – 7.56 (m, 3H), 4.33 (q, *J* = 6.8 Hz, 2H), 1.35 (t, *J* = 6.9 Hz, 3H).

<sup>13</sup>C NMR (100 MHz, DMSO-*d*<sub>6</sub>) δ 166.35, 153.50, 143.50, 138.60, 130.51, 129.63, 129.17, 126.83, 123.77, 122.91, 118.76, 111.45, 60.61, 14.36.

(Known compound: *Eur. J. Inorg.*, 2021, **25**, 2493-2498).

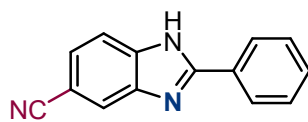

6

**2-phenyl-1H-benzo[d]imidazole-5-carbonitrile**

The product was purified by column chromatography on silica gel (eluent: 5:1 petroleum ether: ethyl acetate) as a white solid (47 mg, 72%).

<sup>1</sup>H NMR (400 MHz, DMSO-*d*<sub>6</sub>) δ 13.48 (s, 1H), 8.22 – 8.14 (m, 3H), 7.75 (d, *J* = 7.7 Hz, 1H), 7.61 – 7.53 (m, 4H).

<sup>13</sup>C NMR (100 MHz, DMSO-*d*<sub>6</sub>) δ 154.41, 130.85, 129.35, 129.21, 126.99, 125.80, 120.12, 104.08.

(Known compound: *Synlett.*, 2019, **30**, 319-324).

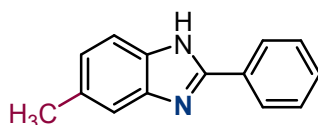

7

### 5-methyl-2-phenyl-1H-benzo[d]imidazole

The product was purified by column chromatography on silica gel (eluent: 5:1 petroleum ether: ethyl acetate) as a yellow solid (15 mg, 24%).

<sup>1</sup>H NMR (400 MHz, DMSO-*d*6) δ 12.81 (s, 1H), 8.16 (d, *J* = 7.4 Hz, 2H), 7.55 (t, *J* = 7.4 Hz, 2H), 7.49 (d, *J* = 6.4 Hz, 2H), 7.38 (s, 1H), 7.03 (d, *J* = 8.1 Hz, 1H), 2.43 (s, 3H).

<sup>13</sup>C NMR (100 MHz, DMSO-*d*6) δ 151.32, 131.77, 130.72, 130.13, 129.37, 126.75, 124.04, 116.15, 21.81.

(Known compound: *Molecular Catalysis.*, 2024, **561**, 114159-114168).

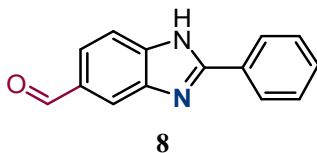

### 2-phenyl-1H-benzo[d]imidazole-5-carbaldehyde

The product was purified by column chromatography on silica gel (eluent: 3:1 petroleum ether: ethyl acetate) as a white solid (42 mg, 63%).

<sup>1</sup>H NMR (400 MHz, DMSO-*d*6) δ 13.46 (s, 1H), 10.08 – 10.06 (m, 1H), 8.23 – 8.18 (m, 3H), 7.78 – 7.59 (m, 4H).

<sup>13</sup>C NMR (100 MHz, DMSO-*d*6) δ 192.51, 154.35, 131.31, 130.63, 129.46, 129.10, 126.88, 123.01.

(Known compound: *J. Med. Chem.*, 1996, **39**, 992-998).

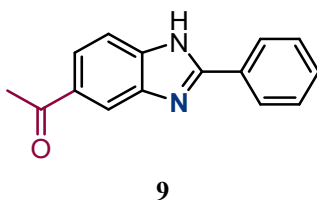

### 1-(2-phenyl-1H-benzo[d]imidazol-5-yl)ethan-1-one

The product was purified by column chromatography on silica gel (eluent: 5:1 petroleum ether: ethyl acetate) as a white solid (45 mg, 66%).

<sup>1</sup>H NMR (400 MHz, CDCl<sub>3</sub>) δ 8.25 (s, 1H), 8.14 (d, *J* = 6.6 Hz, 2H), 7.90 (d, *J* = 8.4 Hz, 1H), 7.62 (d, *J* = 8.4 Hz, 1H), 7.44 (d, *J* = 6.5 Hz, 3H), 2.63 (s, 3H).

<sup>13</sup>C NMR (100 MHz, CDCl<sub>3</sub>) δ 198.43, 154.47, 145.92, 142.83, 132.39, 131.00, 129.24, 128.91, 127.01, 123.72, 116.25, 115.23, 26.87.

(Known compound: *J. Org. Chem.*, 2009, **74**, 7974-7977).

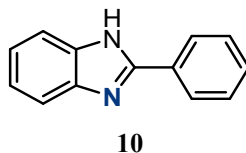

### 2-phenyl-1H-benzo[d]imidazole

The product was purified by column chromatography on silica gel (eluent: 5:1 petroleum ether: ethyl acetate) as a white solid (20 mg, 35%).

<sup>1</sup>H NMR (400 MHz, DMSO-*d*6) 12.96 (s, 1H), 8.24 (d, *J* = 7.3 Hz, 2H), 7.64 (dd, *J* = 5.8, 3.2 Hz, 2H),

7.56 (t,  $J = 7.5$  Hz, 2H), 7.49 (t,  $J = 7.3$  Hz, 1H), 7.25 – 7.21 (m, 2H).

$^{13}\text{C}$  NMR (100 MHz, DMSO- $d_6$ )  $\delta$  151.36, 139.80, 130.29, 129.93, 129.05, 126.56, 122.22, 115.41.

(Known compound: *Molecular Catalysis.*, 2024, **561**, 114159-114168).

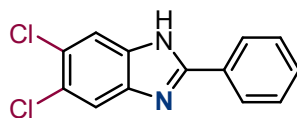

11

#### 5,6-dichloro-2-phenyl-1H-benzo[d]imidazole

The product was purified by column chromatography on silica gel (eluent: 3:1 petroleum ether: ethyl acetate) as a white solid (54 mg, 69%).

$^1\text{H}$  NMR (400 MHz, DMSO- $d_6$ )  $\delta$  13.25 (s, 1H), 8.17 (d,  $J = 7.0$  Hz, 2H), 7.93 (s, 1H), 7.75 (s, 1H), 7.58 – 7.53 (m, 3H).

$^{13}\text{C}$  NMR (100 MHz, DMSO- $d_6$ )  $\delta$  154.27, 143.98, 130.97, 129.75, 129.49, 127.19, 124.81, 120.43, 113.14.

(Known compound: *Green Chem.*, 2021, **23**, 9439-9446).

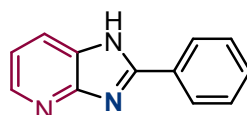

12

#### 2-phenyl-1H-imidazo[4,5-b]pyridine

The product was purified by column chromatography on silica gel (eluent: 2:1 petroleum ether: ethyl acetate) as a yellow solid (41 mg, 71%).

$^1\text{H}$  NMR (400 MHz, DMSO- $d_6$ )  $\delta$  13.78 (s, 1H), 8.65 (d,  $J = 4.0$  Hz, 1H), 8.54 (d,  $J = 6.9$  Hz, 2H), 8.32 (d,  $J = 7.5$  Hz, 1H), 7.89 – 7.81 (m, 3H), 7.55 – 7.53 (m, 1H).

$^{13}\text{C}$  NMR (100 MHz, DMSO- $d_6$ )  $\delta$  152.77, 143.88, 131.25, 130.58, 129.72, 129.08, 128.25, 127.51, 126.80, 118.15.

(Known compound: *J. Org. Chem.*, 2011, **76**, 9577-9583).

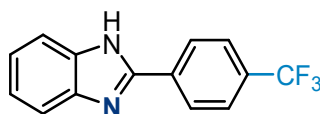

13

#### 2-(4-(trifluoromethyl)phenyl)-1H-benzo[d]imidazole

The product was purified by column chromatography on silica gel (eluent: 5:1 petroleum ether: ethyl acetate) as a white solid (44 mg, 56%).

$^1\text{H}$  NMR (400 MHz, DMSO- $d_6$ )  $\delta$  13.18 (s, 1H), 8.39 (d,  $J = 8.0$  Hz, 2H), 7.93 (d,  $J = 8.0$  Hz, 2H), 7.71 (d,  $J = 7.2$  Hz, 1H), 7.58 (d,  $J = 7.2$  Hz, 1H), 7.29 – 7.21 (m, 2H).

$^{13}\text{C}$  NMR (100 MHz, DMSO- $d_6$ )  $\delta$  149.72, 143.79, 135.17, 134.04, 130.18 (C-F,  $J = 31.7$  Hz), 127.14, 126.07 (C-F,  $J = 3.9$  Hz), 125.57 (C-F,  $J = 270.5$  Hz), 123.29, 122.16, 119.34, 111.74.

$^{19}\text{F}$  NMR (376 MHz, DMSO- $d_6$ )  $\delta$  -61.18.

(Known compound: *Chem. Commun.*, 2019, **55**, 5958-5961).



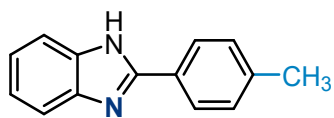

14

#### 2-(*p*-tolyl)-1*H*-benzo[*d*]imidazole

The product was purified by column chromatography on silica gel (eluent: 3:1 petroleum ether: ethyl acetate) as a white solid (27 mg, 43%).

**<sup>1</sup>H NMR (400 MHz, DMSO-*d*6)** δ 12.82 (s, 1H), 8.07 (d, *J* = 8.2 Hz, 2H), 7.65 – 7.50 (m, 2H), 7.36 (d, *J* = 8.0 Hz, 2H), 7.19 – 7.18 (m, 2H), 2.38 (s, 3H).

**<sup>13</sup>C NMR (100 MHz, DMSO-*d*6)** δ 156.58, 149.03, 144.76, 140.15, 134.72, 132.66, 131.59, 127.52, 126.76, 123.91, 116.39, 26.20.

(Known compound: *Adv. Synth. Catal.*, 2017, **359**, 3332-3340).

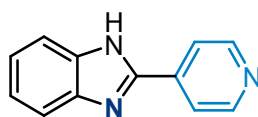

15

#### 2-(pyridin-4-yl)-1*H*-benzo[*d*]imidazole

The product was purified by column chromatography on silica gel (eluent: 5:1 petroleum ether: ethyl acetate) as a white solid (36 mg, 62%).

**<sup>1</sup>H NMR (400 MHz, DMSO-*d*6)** δ 13.31 (s, 1H), 8.77 (d, *J* = 3.3 Hz, 2H), 8.11 (d, *J* = 5.3 Hz, 2H), 7.68 (s, 2H), 7.29 – 7.27 (m, 2H).

**<sup>13</sup>C NMR (100 MHz, DMSO-*d*6)** δ 150.96, 149.22, 138.52, 137.59, 123.41, 120.80.

(Known compound: *RSC Adv.*, 2024, **14**, 6906-6916).

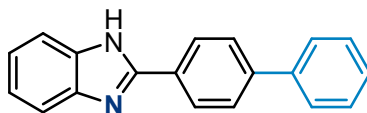

16

#### 2-([1,1'-biphenyl]-4-yl)-1*H*-benzo[*d*]imidazole

The product was purified by column chromatography on silica gel (eluent: 5:1 petroleum ether: ethyl acetate) as a white solid (63 mg, 78%).

**<sup>1</sup>H NMR (400 MHz, DMSO-*d*6)** δ 12.93 (s, 1H), 8.22 (d, *J* = 7.4 Hz, 2H), 7.82 (d, *J* = 7.4 Hz, 2H), 7.72 (d, *J* = 6.9 Hz, 2H), 7.56 (s, 2H), 7.45 (t, *J* = 6.3 Hz, 2H), 7.36 (d, *J* = 6.6 Hz, 1H), 7.17 (s, 2H).

**<sup>13</sup>C NMR (100 MHz, DMSO-*d*6)** δ 151.00, 141.37, 139.34, 129.22, 129.13, 128.00, 127.24, 127.09, 126.79, 122.23, 119.12, 111.71.

(Known compound: *RSC Adv.*, 2019, **9**, 753-760).

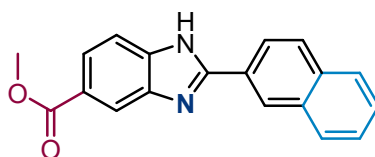

**methyl 2-(naphthalen-2-yl)-1H-benzo[d]imidazole-5-carboxylate**

The product was purified by column chromatography on silica gel (eluent: 3:1 petroleum ether: ethyl acetate) as a white solid (67 mg, 74%).

**<sup>1</sup>H NMR (400 MHz, DMSO-*d*6)** δ 9.05 (d, *J* = 8.2 Hz, 1H), 8.31 (s, 1H), 8.14 (d, *J* = 8.1 Hz, 1H), 8.06 (d, *J* = 7.3 Hz, 2H), 7.92 (d, *J* = 8.3 Hz, 1H), 7.77 (d, *J* = 8.4 Hz, 1H), 7.74 – 7.58 (m, 3H), 3.90 (s, 3H).

**<sup>13</sup>C NMR (100 MHz, DMSO-*d*6)** δ 166.87, 154.02, 133.68, 130.83, 130.50, 128.58, 128.41, 127.40, 126.95, 126.57, 126.07, 125.36, 123.60, 123.46, 52.13.

**HRMS:** C<sub>19</sub>H<sub>15</sub>N<sub>2</sub>O<sub>2</sub> [M+H]<sup>+</sup>; calculated: 303.1133, found: 303.1133.

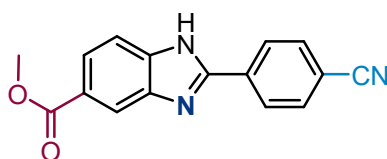

18

**methyl 2-(4-cyanophenyl)-1H-benzo[d]imidazole-5-carboxylate**

The product was purified by column chromatography on silica gel (eluent: 3:1 petroleum ether: ethyl acetate) as a white solid (58 mg, 70%).

**<sup>1</sup>H NMR (400 MHz, DMSO-*d*6)** δ 13.54 (s, 1H), 8.35 (d, *J* = 8.2 Hz, 2H), 8.29 – 8.16 (m, 1H), 8.05 (d, *J* = 8.0 Hz, 2H), 7.88 – 7.67 (m, 2H), 3.88 (s, 3H).

**<sup>13</sup>C NMR (100 MHz, DMSO-*d*6)** δ 166.66, 151.67, 144.01, 138.64, 133.69, 133.14, 127.42, 124.52, 123.21, 118.58, 112.57, 112.56, 111.92, 52.18.

**HRMS:** C<sub>17</sub>H<sub>11</sub>N<sub>3</sub>O<sub>2</sub> [M+H]<sup>+</sup>; calculated: 278.0929, found: 278.0918.

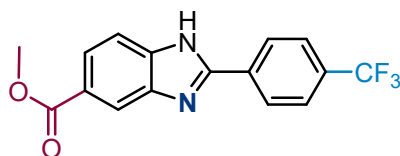

19

**methyl 2-(4-(trifluoromethyl)phenyl)-1H-benzo[d]imidazole-5-carboxylate**

The product was purified by column chromatography on silica gel (eluent: 3:1 petroleum ether: ethyl acetate) as a white solid (65 mg, 68%).

**<sup>1</sup>H NMR (400 MHz, DMSO-*d*6)** δ 13.48 (s, 1H), 8.39 (d, *J* = 8.1 Hz, 2H), 8.29 – 8.13 (m, 1H), 7.94 (d, *J* = 8.2 Hz, 2H), 7.88 – 7.65 (m, 2H), 3.88 (s, 3H).

**<sup>13</sup>C NMR (100 MHz, DMSO-*d*6)** δ 166.73, 151.86, 143.34, 138.65, 133.38, 128.17 (C-F, *J* = 271.0 Hz), 127.47, 126.08 (C-F, *J* = 5.0 Hz), 124.23, 123.73, 120.97, 113.40, 111.81, 52.10.

**<sup>19</sup>F NMR (376 MHz, DMSO-*d*6)** δ -61.32.

**HRMS:** C<sub>16</sub>H<sub>10</sub>F<sub>3</sub>N<sub>2</sub>O<sub>2</sub> [M-H]<sup>-</sup>; calculated: 319.0695, found: 319.0701.

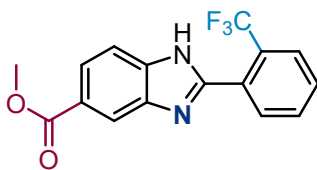

20

**methyl 2-(2-(trifluoromethyl)phenyl)-1H-benzo[d]imidazole-5-carboxylate**

The product was purified by column chromatography on silica gel (eluent: 3:1 petroleum ether: ethyl acetate) as a white solid (65 mg, 66%).

**<sup>1</sup>H NMR (400 MHz, DMSO-*d*6)** δ 13.19 (s, 1H), 8.31 – 8.18 (m, 1H), 7.97 (d, *J* = 7.7 Hz, 1H), 7.90 – 7.84 (m, 3H), 7.82 – 7.79 (m, 1H), 7.79 – 7.67 (m, 1H), 3.88 (s, 3H).

**<sup>13</sup>C NMR (100 MHz, DMSO-*d*6)** δ 166.77, 151.63, 146.85, 143.09, 138.01, 134.31, 132.55, 132.26, 130.67, 129.66, 128.43 (C-F, *J* = 31.0 Hz), 126.82 (C-F, *J* = 5.0 Hz), 125.09 (C-F, *J* = 272.0 Hz), 113.41, 111.74, 52.08.

**<sup>19</sup>F NMR (376 MHz, DMSO-*d*6)** δ -57.07.

**HRMS:** C<sub>16</sub>H<sub>12</sub>F<sub>3</sub>N<sub>2</sub>O<sub>2</sub> [M+H]<sup>+</sup>; calculated: 321.0851, found: 321.0847.

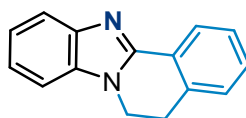

21

**5,6-dihydrobenzo[4,5]imidazo[2,1-*a*]isoquinoline**

The product was purified by column chromatography on silica gel (eluent: 5:1 petroleum ether: ethyl acetate) as a white solid (50 mg, 76%).

**<sup>1</sup>H NMR (400 MHz, CDCl<sub>3</sub>)** δ 8.31 – 8.29 (m, 1H), 7.85 – 7.81 (m, 1H), 7.43 – 7.38 (m, 2H), 7.37 – 7.34 (m, 1H), 7.33 – 7.28 (m, 3H), 4.31 (t, *J* = 6.9 Hz, 2H), 3.27 (t, *J* = 6.8 Hz, 2H).

**<sup>13</sup>C NMR (100 MHz, CDCl<sub>3</sub>)** δ 149.11, 143.84, 134.65, 134.31, 130.22, 128.12, 127.78, 126.63, 125.70, 122.74, 122.53, 119.76, 109.10, 40.44, 28.27.

(Known compound: *J. Org. Chem.*, 2020, **85**, 1991-2009).

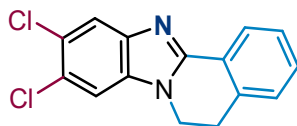

22

**9,10-dichloro-5,6-dihydrobenzo[4,5]imidazo[2,1-*a*]isoquinoline**

The product was purified by column chromatography on silica gel (eluent: 5:1 petroleum ether: ethyl acetate) as a white solid (67 mg, 78%).

**<sup>1</sup>H NMR (400 MHz, CDCl<sub>3</sub>)** δ 8.23 – 8.21 (m, 1H), 7.84 (s, 1H), 7.42 – 7.40 (m, 3H), 7.32 – 7.30 (m, 1H), 4.26 (t, *J* = 6.9 Hz, 2H), 3.28 (t, *J* = 6.8 Hz, 2H).

**<sup>13</sup>C NMR (100 MHz, CDCl<sub>3</sub>)** δ 150.98, 143.21, 134.25, 133.97, 130.91, 128.24, 127.96, 126.62, 126.45, 125.93, 125.90, 120.79, 110.52, 40.75, 28.07.

(Known compound: *Org. Lett.*, 2022, **24**, 8703-8708).

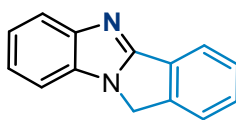

**23**

**11H-benzo[4,5]imidazo[2,1-a]isoindole**

The product was purified by column chromatography on silica gel (eluent: 5:1 petroleum ether: ethyl acetate) as a white solid (44 mg, 71%).

**<sup>1</sup>H NMR (400 MHz, CDCl<sub>3</sub>)** δ 8.08 (d, *J* = 7.3 Hz, 1H), 7.86 – 7.83 (m, 1H), 7.57 (d, *J* = 7.2 Hz, 1H), 7.52 – 7.48 (m, 2H), 7.47 – 7.42 (m, 1H), 7.30 – 7.27 (m, 2H), 5.05 (s, 2H).

**<sup>13</sup>C NMR (100 MHz, CDCl<sub>3</sub>)** δ 158.51, 148.22, 143.58, 132.71, 129.67, 129.39, 128.89, 123.93, 122.84, 122.36, 122.27, 120.58, 109.45, 47.39.

(Known compound: *Org. Biomol. Chem.*, 2010, **8**, 841-845).

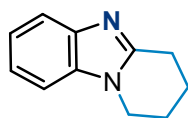

**24**

**1,2,3,4-tetrahydrobenzo[4,5]imidazo[1,2-a]pyridine**

The product was purified by column chromatography on silica gel (eluent: 5:1 petroleum ether: ethyl acetate) as a white solid (31 mg, 61%).

**<sup>1</sup>H NMR (400 MHz, CDCl<sub>3</sub>)** δ 7.68 (d, *J* = 7.3 Hz, 1H), 7.28 (d, *J* = 8.2 Hz, 1H), 7.24 – 7.20 (m, 2H), 4.07 (t, *J* = 5.9 Hz, 2H), 3.09 (t, *J* = 6.1 Hz, 2H), 2.15 – 2.11 (m, 2H), 2.04 – 2.00 (m, 2H).

**<sup>13</sup>C NMR (100 MHz, CDCl<sub>3</sub>)** δ 151.66, 142.73, 134.56, 122.10, 121.67, 118.85, 108.71, 42.45, 25.44, 22.68, 20.77.

(Known compound: *Org. Lett.*, 2022, **24**, 8703-8708).

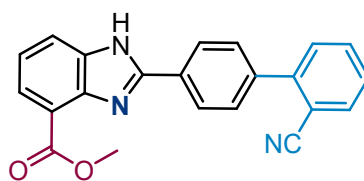

**25**

**methyl 2-(2'-cyano-[1,1'-biphenyl]-4-yl)-1H-benzo[d]imidazole-4-carboxylate**

The product was purified by column chromatography on silica gel (eluent: 3:1 petroleum ether: ethyl acetate) as a yellow solid (86 mg, 81%).

**<sup>1</sup>H NMR (400 MHz, CDCl<sub>3</sub>)** δ 8.25 (d, *J* = 8.2 Hz, 2H), 8.07 (d, *J* = 8.0 Hz, 1H), 7.95 (d, *J* = 7.7 Hz, 1H), 7.83 (d, *J* = 7.7 Hz, 1H), 7.76 (d, *J* = 8.2 Hz, 2H), 7.71 (t, *J* = 7.7 Hz, 1H), 7.60 (d, *J* = 7.6 Hz, 1H), 7.51 (t, *J* = 7.6 Hz, 1H), 7.37 (t, *J* = 7.9 Hz, 1H), 4.06 (s, 3H).

**<sup>13</sup>C NMR (100 MHz, CDCl<sub>3</sub>)** δ 167.05, 151.82, 144.63, 144.32, 140.22, 135.05, 133.91, 133.02, 130.02, 129.58, 129.46, 128.13, 127.17, 125.12, 125.00, 122.26, 118.52, 113.49, 111.22, 52.33.

**HRMS:** C<sub>22</sub>H<sub>16</sub>N<sub>3</sub>O<sub>2</sub> [M+H]<sup>+</sup>; calculated: 354.1242, found: 354.1244.

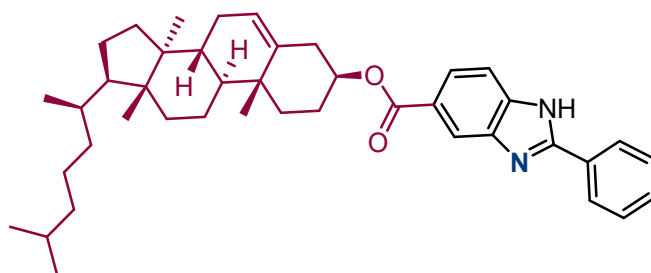

26

**(3*S*,8*R*,9*S*,10*R*,13*R*,14*S*,17*R*)-10,13,14-trimethyl-17-((*R*)-6-methylheptan-2-yl)-2,3,4,7,8,9,10,11,12,13,14,15,16,17-tetradecahydro-1*H*-cyclopenta[*a*]phenanthren-3-yl 2-phenyl-1*H*-benzo[*d*]imidazole-5-carboxylate**

The product was purified by column chromatography on silica gel (eluent: 3:1 petroleum ether: ethyl acetate) as a yellow solid (128 mg, 69%).

**<sup>1</sup>H NMR (400 MHz, CDCl<sub>3</sub>)** δ 8.38 (s, 1H), 8.16 (s, 2H), 7.98 (d, *J* = 8.4 Hz, 1H), 7.66 (d, *J* = 8.4 Hz, 1H), 7.43 (s, 3H), 5.39 (d, *J* = 3.6 Hz, 1H), 4.90 – 4.83 (m, 1H), 2.46 (d, *J* = 7.2 Hz, 2H), 2.00 (t, *J* = 13.3 Hz, 3H), 1.92 (s, 1H), 1.89 – 1.77 (m, 1H), 1.76 – 1.60 (m, 2H), 1.58 – 1.49 (m, 4H), 1.46 (s, 2H), 1.35 – 1.33 (m, 2H), 1.25 (s, 2H), 1.24 – 1.18 (m, 2H), 1.14 (s, 2H), 1.10 (d, *J* = 11.1 Hz, 2H), 1.06 (s, 3H), 1.03 – 0.97 (m, 3H), 0.92 (d, *J* = 6.3 Hz, 3H), 0.87 (d, *J* = 6.5 Hz, 6H), 0.69 (s, 3H).

**<sup>13</sup>C NMR (100 MHz, CDCl<sub>3</sub>)** δ 166.48, 153.72, 146.09, 139.73, 131.12, 129.22, 128.44, 127.25, 125.92, 124.82, 122.88, 112.17, 74.88, 56.81, 56.26, 50.16, 42.42, 39.84, 39.61, 38.36, 37.14, 36.75, 36.29, 35.89, 32.03, 31.97, 28.33, 28.10, 28.02, 24.38, 23.95, 22.91, 22.65, 21.15, 19.48, 18.82, 11.96.

**HRMS:** C<sub>41</sub>H<sub>55</sub>N<sub>2</sub>O<sub>2</sub> [M-H]<sup>-</sup>; calculated: 605.4107, found: 605.4128.

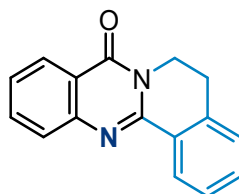

27

**5,6-dihydro-8*H*-isoquinolino[1,2-*b*]quinazolin-8-one**

The product was purified by column chromatography on silica gel (eluent: 5:1 petroleum ether: ethyl acetate) as a white solid (57 mg, 75%).

**<sup>1</sup>H NMR (400 MHz, CDCl<sub>3</sub>)** δ 8.52 (d, *J* = 7.4 Hz, 1H), 8.32 (d, *J* = 7.9 Hz, 1H), 7.82 (d, *J* = 8.0 Hz, 1H), 7.78 – 7.74 (m, 1H), 7.51 – 7.43 (m, 3H), 7.30 (d, *J* = 7.1 Hz, 1H), 4.43 (t, *J* = 6.4 Hz, 2H), 3.11 (t, *J* = 6.4 Hz, 2H).

**<sup>13</sup>C NMR (100 MHz, CDCl<sub>3</sub>)** δ 161.70, 149.59, 147.59, 137.19, 134.41, 131.97, 129.38, 128.24, 127.78, 127.62, 127.52, 126.97, 126.72, 120.74, 39.73, 27.54.

(Known compound: *J. Org. Chem.*, 2023, **88**, 1061-1074).

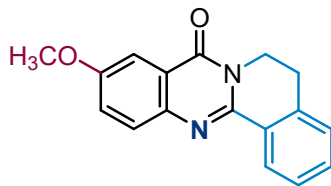

28

**10-methoxy-5,6-dihydro-8H-isoquinolino[1,2-b]quinazolin-8-one**

The product was purified by column chromatography on silica gel (eluent: 5:1 petroleum ether: ethyl acetate) as a white solid (58 mg, 70%).

**<sup>1</sup>H NMR (400 MHz, CDCl<sub>3</sub>)** δ 8.45 (d, *J* = 7.2 Hz, 1H), 7.71 (d, *J* = 8.9 Hz, 1H), 7.67 (d, *J* = 2.9 Hz, 1H), 7.48 – 7.40 (m, 2H), 7.35 (dd, *J* = 8.9, 3.0 Hz, 1H), 7.28 (d, *J* = 6.9 Hz, 1H), 4.46 – 4.38 (m, 2H), 3.93 (s, 3H), 3.10 (t, *J* = 6.4 Hz, 2H).

**<sup>13</sup>C NMR (100 MHz, CDCl<sub>3</sub>)** δ 161.55, 158.38, 147.48, 142.47, 136.77, 131.43, 129.70, 129.27, 127.77, 127.68, 127.55, 124.76, 121.52, 106.22, 55.93, 39.83, 27.58.

(Known compound: *RSC Adv.*, 2020, **10**, 44382-44386).

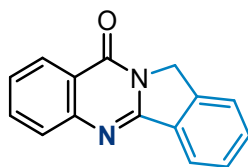

29

**isoindolo[1,2-b]quinazolin-10(12H)-one**

The product was purified by column chromatography on silica gel (eluent: 5:1 petroleum ether: ethyl acetate) as a white solid (50 mg, 71%).

**<sup>1</sup>H NMR (400 MHz, CDCl<sub>3</sub>)** δ 8.38 (d, *J* = 7.9 Hz, 1H), 8.21 (d, *J* = 7.3 Hz, 1H), 7.85 (d, *J* = 8.0 Hz, 1H), 7.79 (t, *J* = 7.5 Hz, 1H), 7.67 – 7.58 (m, 3H), 7.50 (t, *J* = 7.4 Hz, 1H), 5.16 (s, 2H).

**<sup>13</sup>C NMR (100 MHz, CDCl<sub>3</sub>)** δ 160.65, 155.08, 149.34, 139.75, 134.40, 132.66, 132.51, 129.03, 127.36, 126.60, 126.55, 123.78, 123.58, 120.65, 49.94.

(Known compound: *J. Org. Chem.*, 2024, **89**, 4395-4405).

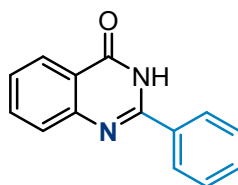

30

**2-phenylquinazolin-4(3H)-one**

The product was purified by column chromatography on silica gel (eluent: 5:1 petroleum ether: ethyl acetate) as a white solid (27 mg, 41%).

**<sup>1</sup>H NMR (400 MHz, DMSO-*d*<sub>6</sub>)** δ 12.55 (s, 1H), 8.17 (t, *J* = 8.7 Hz, 3H), 7.84 (t, *J* = 7.4 Hz, 1H), 7.75 (d, *J* = 8.0 Hz, 1H), 7.59 – 7.51 (m, 4H).

$^{13}\text{C}$  NMR (100 MHz, DMSO-*d*6)  $\delta$  162.32, 152.39, 148.82, 134.71, 132.80, 131.49, 128.70, 127.85, 127.60, 126.69, 125.94, 121.07.

(Known compound: *Chem. Commun.*, 2024, **60**, 6043-6046).

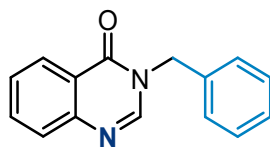

**31**

**3-benzylquinazolin-4(3H)-one**

The product was purified by column chromatography on silica gel (eluent: 5:1 petroleum ether: ethyl acetate) as a white solid (61 mg, 86%).

$^1\text{H}$  NMR (400 MHz,  $\text{CDCl}_3$ )  $\delta$  8.33 (d,  $J$  = 8.0 Hz, 1H), 8.12 (s, 1H), 7.77 – 7.70 (m, 2H), 7.51 (t,  $J$  = 7.2 Hz, 1H), 7.36 – 7.30 (m, 5H), 5.20 (s, 2H).

$^{13}\text{C}$  NMR (100 MHz,  $\text{CDCl}_3$ )  $\delta$  161.09, 147.97, 146.41, 135.74, 134.40, 129.09, 128.38, 128.07, 127.51, 127.47, 126.95, 122.23, 49.68.

(Known compound: *Org. Biomol. Chem.*, 2020, **18**, 5726-5733).

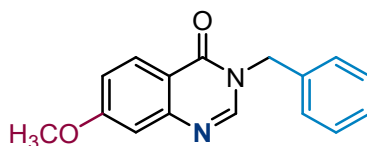

**32**

**3-benzyl-7-methoxyquinazolin-4(3H)-one**

The product was purified by column chromatography on silica gel (eluent: 5:1 petroleum ether: ethyl acetate) as a white solid (66 mg, 83%).

$^1\text{H}$  NMR (400 MHz,  $\text{CDCl}_3$ )  $\delta$  8.03 (s, 1H), 7.69 (d,  $J$  = 2.9 Hz, 1H), 7.64 (d,  $J$  = 8.9 Hz, 1H), 7.36 – 7.33 (m, 5H), 7.32 – 7.30 (m, 1H), 5.21 (s, 2H), 3.91 (s, 3H).

$^{13}\text{C}$  NMR (100 MHz,  $\text{CDCl}_3$ )  $\delta$  160.99, 158.89, 144.26, 142.57, 135.83, 129.07, 129.02, 128.35, 128.06, 124.66, 123.07, 106.27, 55.90, 49.78.

(Known compound: *J. Org. Chem.*, 2022, **87**, 9864-9874).

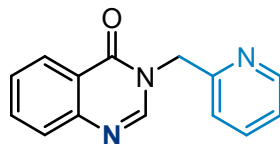

**33**

**3-(pyridin-2-ylmethyl)quinazolin-4(3H)-one**

The product was purified by column chromatography on silica gel (eluent: 4:1 petroleum ether: ethyl acetate) as a yellow solid (60 mg, 85%).

$^1\text{H}$  NMR (400 MHz,  $\text{CDCl}_3$ )  $\delta$  8.54 (d,  $J$  = 4.1 Hz, 1H), 8.33 (s, 1H), 8.29 (d,  $J$  = 8.0 Hz, 1H), 7.77 – 7.71 (m, 2H), 7.67 (t,  $J$  = 7.6 Hz, 1H), 7.49 (t,  $J$  = 7.1 Hz, 1H), 7.42 (d,  $J$  = 7.7 Hz, 1H), 7.22 – 7.19 (m, 1H), 5.28 (s, 2H).

$^{13}\text{C}$  NMR (100 MHz,  $\text{CDCl}_3$ )  $\delta$  161.13, 154.98, 149.80, 148.30, 147.08, 137.11, 134.37, 127.64, 127.30, 126.84, 123.18, 123.02, 122.23, 51.24.

(Known compound: *J. Org. Chem.*, 2020, **85**, 7378-7385).

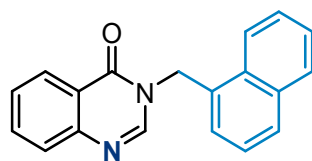

34

**3-(naphthalen-1-ylmethyl)quinazolin-4(3H)-one**

The product was purified by column chromatography on silica gel (eluent: 4:1 petroleum ether: ethyl acetate) as a white solid (72 mg, 84%).

$^1\text{H}$  NMR (400 MHz,  $\text{CDCl}_3$ )  $\delta$  8.41 (d,  $J = 8.0$  Hz, 1H), 8.02 (d,  $J = 9.7$  Hz, 2H), 7.89 (t,  $J = 9.4$  Hz, 2H), 7.77 (t,  $J = 7.0$  Hz, 1H), 7.70 (d,  $J = 8.0$  Hz, 1H), 7.59 – 7.52 (m, 3H), 7.46 (t,  $J = 7.6$  Hz, 1H), 7.39 (d,  $J = 6.9$  Hz, 1H), 5.70 (s, 2H).

$^{13}\text{C}$  NMR (100 MHz,  $\text{CDCl}_3$ )  $\delta$  161.09, 147.67, 145.97, 134.51, 134.02, 131.07, 130.78, 129.58, 129.07, 127.56, 127.46, 127.26, 127.22, 127.12, 126.43, 125.43, 123.01, 121.99, 46.84.

(Known compound: *Org. Lett.*, 2020, **22**, 2522-2526).

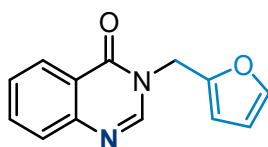

35

**3-(furan-2-ylmethyl)quinazolin-4(3H)-one**

The product was purified by column chromatography on silica gel (eluent: 4:1 petroleum ether: ethyl acetate) as a white solid (54 mg, 79%).

$^1\text{H}$  NMR (400 MHz,  $\text{CDCl}_3$ )  $\delta$  8.30 (d,  $J = 8.0$  Hz, 1H), 8.17 (s, 1H), 7.76 – 7.68 (m, 2H), 7.49 (t,  $J = 7.4$  Hz, 1H), 7.37 (s, 1H), 6.46 (d,  $J = 3.2$  Hz, 1H), 6.35 – 6.33 (m, 1H), 5.18 (s, 2H).

$^{13}\text{C}$  NMR (100 MHz,  $\text{CDCl}_3$ )  $\delta$  160.71, 148.46, 147.96, 146.08, 143.24, 134.41, 127.53, 127.43, 126.88, 122.17, 110.84, 110.05, 42.18.

(Known compound: *J. Org. Chem.*, 2022, **87**, 9864-9874).

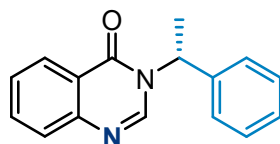

36

**(R)-3-(1-phenylethyl)quinazolin-4(3H)-one**

The product was purified by column chromatography on silica gel (eluent: 5:1 petroleum ether: ethyl acetate) as a white solid (60 mg, 80%).



**<sup>1</sup>H NMR (400 MHz, CDCl<sub>3</sub>)** δ 8.35 (d, *J* = 8.0 Hz, 1H), 7.94 (s, 1H), 7.77 – 7.73 (m, 1H), 7.68 (d, *J* = 7.7 Hz, 1H), 7.53 – 7.49 (m, 1H), 7.39 – 7.37 (m, 4H), 7.34 – 7.30 (m, 1H), 6.37 (q, *J* = 7.2 Hz, 1H), 1.85 (d, *J* = 7.2 Hz, 3H).

**<sup>13</sup>C NMR (100 MHz, CDCl<sub>3</sub>)** δ 160.86, 147.57, 144.55, 139.48, 134.35, 129.14, 128.40, 127.44, 127.38, 127.35, 127.09, 121.93, 51.86, 19.29.

(Known compound: *Tetrahedron Lett.*, 2014, **55**, 6004-6006).

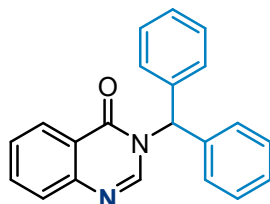

37

### 3-benzhydrylquinazolin-4(3H)-one

The product was purified by column chromatography on silica gel (eluent: 3:1 petroleum ether: ethyl acetate) as a white solid (72 mg, 77%).

**<sup>1</sup>H NMR (400 MHz, CDCl<sub>3</sub>)** δ 8.34 (dd, *J* = 8.0, 1.0 Hz, 1H), 7.99 (s, 1H), 7.78 – 7.74 (m, 1H), 7.72 – 7.70 (m, 1H), 7.53 – 7.49 (m, 1H), 7.47 (s, 1H), 7.40 – 7.34 (m, 6H), 7.24 – 7.22 (m, 4H).

**<sup>13</sup>C NMR (100 MHz, CDCl<sub>3</sub>)** δ 160.92, 147.60, 145.46, 138.05, 134.46, 129.09, 128.60, 128.40, 127.50, 127.42, 127.17, 121.87, 60.78.

(Known compound: *Org. Lett.*, 2020, **22**, 2522-2526).

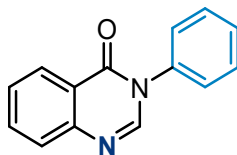

38

### 3-phenylquinazolin-4(3H)-one

The product was purified by column chromatography on silica gel (eluent: 5:1 petroleum ether: ethyl acetate) as a white solid (50 mg, 75%).

**<sup>1</sup>H NMR (400 MHz, CDCl<sub>3</sub>)** δ 8.37 (dd, *J* = 0.8, 0.8 Hz, 1H), 8.13 (s, 1H), 7.83 – 7.76 (m, 2H), 7.57 – 7.53 (m, 3H), 7.51 – 7.47 (m, 1H), 7.44 – 7.42 (m, 2H).

**<sup>13</sup>C NMR (100 MHz, CDCl<sub>3</sub>)** δ 160.80, 147.89, 146.16, 137.55, 134.66, 129.72, 129.19, 127.73, 127.62, 127.26, 127.07, 122.44.

(Known compound: *Angew. Chem. Int. Ed.*, 2014, **53**, 1420-1424).

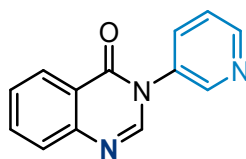

39

### 3-(pyridin-3-yl)quinazolin-4(3H)-one

The product was purified by column chromatography on silica gel (eluent: 5:1 petroleum ether: ethyl acetate) as a yellow solid (52 mg, 78%).

**<sup>1</sup>H NMR (400 MHz, CDCl<sub>3</sub>)** δ 8.72 – 8.69 (m, 2H), 8.32 (d, *J* = 7.9 Hz, 1H), 8.08 (s, 1H), 7.84 – 7.74 (m, 3H), 7.54 (t, *J* = 7.5 Hz, 1H), 7.50 – 7.47 (m, 1H).

**<sup>13</sup>C NMR (100 MHz, CDCl<sub>3</sub>)** δ 160.54, 150.13, 147.75, 147.54, 145.08, 134.94, 134.79, 134.19, 127.99, 127.77, 127.16, 123.99, 122.06.

(Known compound: *Org. Lett.*, 2012, **14**, 1150-1153).

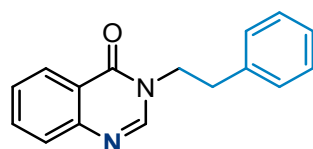

**40**

### 3-phenethylquinazolin-4(3H)-one

The product was purified by column chromatography on silica gel (eluent: 5:1 petroleum ether: ethyl acetate) as a white solid (64 mg, 85%).

**<sup>1</sup>H NMR (400 MHz, CDCl<sub>3</sub>)** δ 8.36 (dd, *J* = 8.0, 1.0 Hz, 1H), 7.77 (t, *J* = 7.6 Hz, 1H), 7.74 – 7.64 (m, 2H), 7.53 (t, *J* = 7.5 Hz, 1H), 7.32 – 7.25 (m, 3H), 7.18 (d, *J* = 6.8 Hz, 2H), 4.23 (t, *J* = 7.1 Hz, 2H), 3.12 (t, *J* = 7.0 Hz, 2H).

**<sup>13</sup>C NMR (100 MHz, CDCl<sub>3</sub>)** δ 161.06, 148.11, 146.50, 137.45, 134.23, 128.93, 128.92, 127.48, 127.26, 127.09, 126.69, 122.11, 48.92, 35.18.

(Known compound: *J. Org. Chem.*, 2020, **85**, 7378-7385).

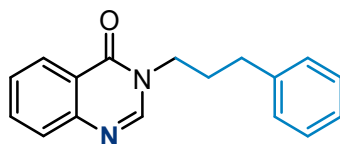

**41**

### 3-(3-phenylpropyl)quinazolin-4(3H)-one

The product was purified by column chromatography on silica gel (eluent: 5:1 petroleum ether: ethyl acetate) as a white solid (66 mg, 83%).

**<sup>1</sup>H NMR (400 MHz, CDCl<sub>3</sub>)** δ 8.30 (d, *J* = 7.9 Hz, 1H), 7.95 (s, 1H), 7.76 – 7.67 (m, 2H), 7.49 (t, *J* = 7.3 Hz, 1H), 7.31 – 7.26 (m, 2H), 7.20 – 7.17 (m, 3H), 4.00 (t, *J* = 7.3 Hz, 2H), 2.72 (t, *J* = 7.6 Hz, 2H), 2.20 – 2.11 (m, 2H).

**<sup>13</sup>C NMR (100 MHz, CDCl<sub>3</sub>)** δ 161.04, 148.06, 146.51, 140.33, 134.15, 128.57, 128.27, 127.39, 127.24, 126.65, 126.25, 122.13, 46.59, 32.71, 30.36.

(Known compound: *J. Org. Chem.*, 2022, **87**, 9864-9874).

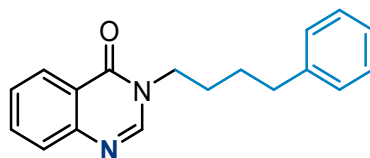

**42**

### 3-(4-phenylbutyl)quinazolin-4(3H)-one

The product was purified by column chromatography on silica gel (eluent: 5:1 petroleum ether: ethyl acetate) as a white solid (69 mg, 83%).

**<sup>1</sup>H NMR (400 MHz, CDCl<sub>3</sub>)** δ 8.31 (d, *J* = 9.0 Hz, 1H), 8.00 (s, 1H), 7.77 – 7.69 (m, 2H), 7.52 – 7.48 (m, 1H), 7.27 (t, *J* = 7.3 Hz, 2H), 7.22 – 7.13 (m, 3H), 4.00 (t, *J* = 7.2 Hz, 2H), 2.67 (t, *J* = 7.5 Hz, 2H), 1.88 – 1.80 (m, 2H), 1.75 – 1.68 (m, 2H).

**<sup>13</sup>C NMR (100 MHz, CDCl<sub>3</sub>)** δ 161.05, 148.05, 146.55, 141.63, 134.22, 128.46, 128.43, 127.40, 127.31, 126.75, 126.03, 122.19, 46.90, 35.45, 29.02, 28.46.

**HRMS:** C<sub>18</sub>H<sub>17</sub>N<sub>2</sub>O [M-H]<sup>-</sup>; calculated: 277.1341, found: 277.1342.

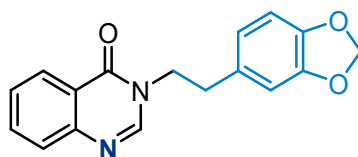

43

### 3-(2-(benzo[d][1,3]dioxol-5-yl)ethyl)quinazolin-4(3H)-one

The product was purified by column chromatography on silica gel (eluent: 5:1 petroleum ether: ethyl acetate) as a white solid (76 mg, 86%).

**<sup>1</sup>H NMR (400 MHz, CDCl<sub>3</sub>)** δ 8.33 (dd, *J* = 8.0, 1.1 Hz, 1H), 7.77 – 7.73 (m, 1H), 7.67 (d, *J* = 8.3 Hz, 2H), 7.51 (t, *J* = 7.5 Hz, 1H), 6.70 (d, *J* = 7.9 Hz, 1H), 6.66 (d, *J* = 1.4 Hz, 1H), 6.56 (dd, *J* = 7.9, 1.5 Hz, 1H), 5.93 (s, 2H), 4.17 (t, *J* = 6.9 Hz, 2H), 3.01 (t, *J* = 6.9 Hz, 2H).

**<sup>13</sup>C NMR (100 MHz, CDCl<sub>3</sub>)** δ 161.06, 148.08, 148.07, 146.65, 146.55, 134.30, 131.07, 127.47, 127.31, 126.72, 122.09, 122.02, 109.13, 108.67, 101.09, 49.12, 34.85.

(Known compound: *Synthetic Commun.*, 2011, **42**, 341-349).

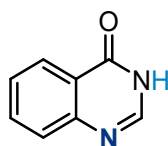

44

### quinazolin-4(3H)-one

The product was purified by column chromatography on silica gel (eluent: 3:1 petroleum ether: ethyl acetate) as a white solid (25 mg, 57%).

**<sup>1</sup>H NMR (400 MHz, DMSO-*d*<sub>6</sub>)** δ 12.23 (s, 1H), 8.12 (dd, *J* = 1.6, 1.2 Hz, 1H), 8.09 (s, 1H), 7.79 (t, *J* = 8.0 Hz, 1H), 7.65 (d, *J* = 8.4 Hz, 1H), 7.51 (t, *J* = 7.6, 1H).

**<sup>13</sup>C NMR (100 MHz, DMSO-*d*<sub>6</sub>)** δ 160.85, 148.80, 145.48, 134.36, 127.25, 126.79, 125.91, 122.71.

(Known compound: *Org. Biomol. Chem.*, 2020, **18**, 5726-5733).

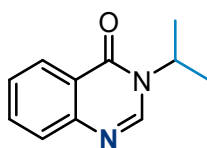

45

### 3-isopropylquinazolin-4(3H)-one

The product was purified by column chromatography on silica gel (eluent: 5:1 petroleum ether: ethyl acetate) as a white solid (42 mg, 73%).

**<sup>1</sup>H NMR (400 MHz, CDCl<sub>3</sub>)** δ 8.28 (d, *J* = 8.0 Hz, 1H), 8.10 (s, 1H), 7.74 – 7.66 (m, 2H), 7.46 (t, *J* = 7.4 Hz, 1H), 5.20 – 5.14 (m, 1H), 1.47 (d, *J* = 6.9 Hz, 6H).

**<sup>13</sup>C NMR (100 MHz, CDCl<sub>3</sub>)** δ 160.66, 147.53, 143.60, 134.13, 127.26, 127.17, 126.89, 121.96, 46.08, 22.01.

(Known compound: *Tetrahedron Lett.*, 2013, **54**, 3518-3521).

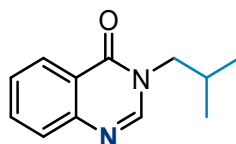

46

### 3-isobutylquinazolin-4(3H)-one

The product was purified by column chromatography on silica gel (eluent: 5:1 petroleum ether: ethyl acetate) as a yellow solid (46 mg, 76%).

**<sup>1</sup>H NMR (400 MHz, CDCl<sub>3</sub>)** δ 8.31 (d, *J* = 8.0 Hz, 1H), 8.00 (s, 1H), 7.77 – 7.70 (m, 2H), 7.50 (t, *J* = 7.4 Hz, 1H), 3.81 (d, *J* = 7.4 Hz, 2H), 2.26 – 2.16 (m, 1H), 0.98 (d, *J* = 6.7 Hz, 6H).

**<sup>13</sup>C NMR (100 MHz, CDCl<sub>3</sub>)** δ 161.28, 148.08, 147.00, 134.23, 127.44, 127.30, 126.86, 122.24, 54.22, 28.23, 19.99.

(Known compound: *Tetrahedron.*, 2013, **69**, 1705-1711).

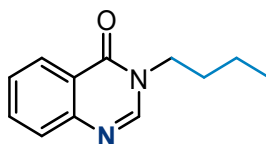

47

### 3-butylquinazolin-4(3H)-one

The product was purified by column chromatography on silica gel (eluent: 5:1 petroleum ether: ethyl acetate) as a yellow solid (45 mg, 74%).

**<sup>1</sup>H NMR (400 MHz, CDCl<sub>3</sub>)** δ 8.29 (d, *J* = 7.9 Hz, 1H), 8.02 (s, 1H), 7.75 – 7.68 (m, 2H), 7.48 (t, *J* = 8.0 Hz, 1H), 3.99 (t, *J* = 7.3 Hz, 2H), 1.80 – 1.73 (m, 2H), 1.45 – 1.35 (m, 2H), 0.96 (t, *J* = 7.3 Hz, 3H).

**<sup>13</sup>C NMR (100 MHz, CDCl<sub>3</sub>)** δ 161.08, 148.09, 146.65, 134.17, 127.39, 127.26, 126.74, 122.23, 46.86, 31.47, 19.94, 13.68.

(Known compound: *Tetrahedron Lett.*, 2014, **55**, 6004-6006).

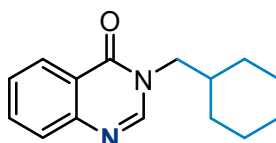

48

### 3-(cyclohexylmethyl)quinazolin-4(3H)-one

The product was purified by column chromatography on silica gel (eluent: 5:1 petroleum ether: ethyl acetate) as a yellow solid (58 mg, 80%).

**<sup>1</sup>H NMR (400 MHz, CDCl<sub>3</sub>)** δ 8.29 (d, *J* = 8.0 Hz, 1H), 7.96 (s, 1H), 7.75 – 7.67 (m, 2H), 7.47 (t, *J* = 7.4 Hz, 1H), 3.80 (d, *J* = 7.2 Hz, 2H), 1.88 – 1.83 (m, 1H), 1.71 – 1.69 (m, 5H), 1.21 – 1.13 (m, 3H), 1.04 – 0.96 (m, 2H).

**<sup>13</sup>C NMR (100 MHz, CDCl<sub>3</sub>)** δ 161.26, 148.08, 147.02, 134.14, 127.39, 127.20, 126.78, 122.21, 53.10, 37.25, 30.64, 26.22, 25.61.

(Known compound: *J. Org. Chem.*, 2022, **87**, 9864-9874).

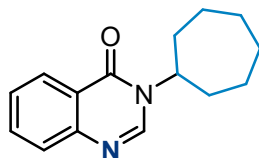

**49**

### 3-cycloheptylquinazolin-4(3H)-one

The product was purified by column chromatography on silica gel (eluent: 3:1 petroleum ether: ethyl acetate) as a yellow solid (61 mg, 84%).

**<sup>1</sup>H NMR (400 MHz, CDCl<sub>3</sub>)** δ 8.30 (d, *J* = 8.0 Hz, 1H), 8.11 (s, 1H), 7.76 – 7.68 (m, 2H), 7.51 – 7.47 (m, 1H), 4.96 – 4.89 (m, 1H), 2.08 – 2.01 (m, 2H), 1.93 – 1.81 (m, 4H), 1.74 – 1.71 (m, 2H), 1.66 – 1.58 (m, 4H).

**<sup>13</sup>C NMR (100 MHz, CDCl<sub>3</sub>)** δ 160.40, 147.49, 144.48, 134.14, 127.24, 127.20, 127.00, 122.03, 55.72, 35.15, 27.36, 25.34.

(Known compound: *Tetrahedron Lett.*, 2014, **55**, 6004-6006).

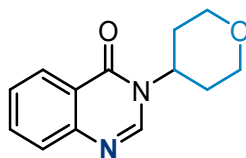

**50**

### 3-(tetrahydro-2H-pyran-4-yl)quinazolin-4(3H)-one

The product was purified by column chromatography on silica gel (eluent: 3:1 petroleum ether: ethyl acetate) as a white solid (57 mg, 83%).

**<sup>1</sup>H NMR (400 MHz, CDCl<sub>3</sub>)** δ 8.31 (dd, *J* = 8.0, 1.2 Hz, 1H), 8.13 (s, 1H), 7.68 – 7.70 (m, 2H), 7.52 – 7.48 (m, 1H), 5.13 – 5.05 (m, 1H), 4.15 (dd, *J* = 11.7, 4.4 Hz, 2H), 3.64 – 3.57 (m, 2H), 2.08 – 1.97 (m, 2H), 1.95 – 1.91 (m, 2H).

**<sup>13</sup>C NMR (100 MHz, CDCl<sub>3</sub>)** δ 160.68, 147.36, 143.45, 134.44, 127.44, 127.39, 127.03, 121.71, 67.44, 50.49, 32.40.

(Known compound: *Org. Lett.*, 2009, **11**, 1421-1424).

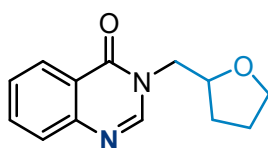

S35

### 3-((tetrahydrofuran-2-yl)methyl)quinazolin-4(3H)-one

The product was purified by column chromatography on silica gel (eluent: 5:1 petroleum ether: ethyl acetate) as a white solid (52 mg, 75%).

**<sup>1</sup>H NMR (400 MHz, CDCl<sub>3</sub>)** δ 8.30 (dd, *J* = 7.6, 0.8 Hz, 1H), 8.15 (s, 1H), 7.76 – 7.70 (m, 2H), 7.51 – 7.47 (m, 1H), 4.34 (dd, *J* = 13.8, 2.9 Hz, 1H), 4.24 – 4.18 (m, 1H), 3.90 – 3.83 (m, 2H), 3.77 – 3.72 (m, 1H), 2.13 – 2.05 (m, 1H), 1.93 – 1.84 (m, 2H), 1.65 – 1.56 (m, 1H).

**<sup>13</sup>C NMR (100 MHz, CDCl<sub>3</sub>)** δ 161.34, 148.11, 147.57, 134.29, 127.47, 127.16, 126.81, 122.05, 76.89, 68.25, 49.58, 28.85, 25.87.

(Known compound: *Tetrahedron Lett.*, 2014, **55**, 6004-6006).

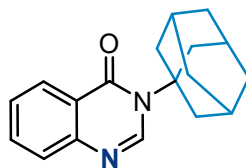

52

### 3-(adamantan-1-yl)quinazolin-4(3H)-one

The product was purified by column chromatography on silica gel (eluent: 5:1 petroleum ether: ethyl acetate) as a white solid (58 mg, 69%).

**<sup>1</sup>H NMR (400 MHz, CDCl<sub>3</sub>)** δ 8.27 (d, *J* = 9.5 Hz, 2H), 7.72 (t, *J* = 7.0 Hz, 1H), 7.66 (d, *J* = 8.0 Hz, 1H), 7.46 (t, *J* = 7.4 Hz, 1H), 2.45 (s, 6H), 2.27 (s, 3H), 1.83 – 1.75 (m, 6H).

**<sup>13</sup>C NMR (100 MHz, CDCl<sub>3</sub>)** δ 162.04, 146.76, 144.06, 134.03, 126.99, 126.81, 126.61, 123.18, 62.69, 39.96, 36.07, 30.08.

**HRMS:** C<sub>18</sub>H<sub>21</sub>N<sub>2</sub>O [M+H]<sup>+</sup>; calculated: 281.1654, found: 281.1651.

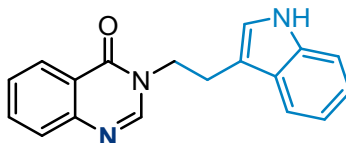

53

### 3-(2-(1H-indol-3-yl)ethyl)quinazolin-4(3H)-one

The product was purified by column chromatography on silica gel (eluent: 5:1 petroleum ether: ethyl acetate) as a white solid (64 mg, 74%).

**<sup>1</sup>H NMR (400 MHz, CDCl<sub>3</sub>)** δ 8.37 (d, *J* = 8.0 Hz, 1H), 8.27 (s, 1H), 7.74 (t, *J* = 7.6 Hz, 1H), 7.65 (d, *J* = 5.9 Hz, 2H), 7.53 – 7.50 (m, 2H), 7.35 (d, *J* = 8.1 Hz, 1H), 7.20 (t, *J* = 7.5 Hz, 1H), 7.13 (t, *J* = 7.4 Hz, 1H), 6.85 (s, 1H), 4.30 (t, *J* = 6.7 Hz, 2H), 3.27 (t, *J* = 6.7 Hz, 2H).

**<sup>13</sup>C NMR (100 MHz, CDCl<sub>3</sub>)** δ 161.17, 148.15, 146.80, 136.52, 134.23, 127.38, 127.21, 126.87, 126.70, 122.86, 122.42, 122.14, 119.79, 118.42, 111.58, 111.29, 47.62, 24.99.

(Known compound: *J. Org. Chem.*, 2020, **85**, 7378-7385).

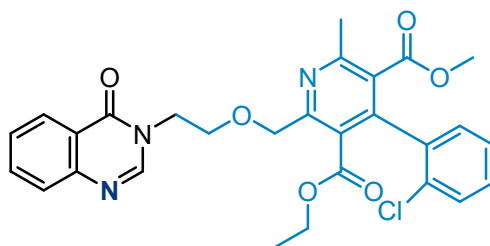

54

**3-ethyl 5-methyl 4-(2-chlorophenyl)-6-methyl-2-((2-(4-oxoquinazolin-3(4H)-yl)ethoxy)methyl)pyridine-3,5-dicarboxylate**

The product was purified by column chromatography on silica gel (eluent: 5:1 petroleum ether: ethyl acetate) as a yellow solid (115 mg, 72%).

**<sup>1</sup>H NMR (400 MHz, CDCl<sub>3</sub>)** δ 8.25 (d, *J* = 8.1 Hz, 1H), 8.05 (s, 1H), 7.73 – 7.65 (m, 2H), 7.47 – 7.43 (m, 1H), 7.38 – 7.36 (m, 1H), 7.31 – 7.27 (m, 1H), 7.25 – 7.22 (m, 1H), 7.14 (dd, *J* = 7.5, 1.7 Hz, 1H), 4.75 (dd, *J* = 33.0, 12.7 Hz, 2H), 4.13 (dd, *J* = 7.8, 4.6 Hz, 2H), 3.93 (q, *J* = 7.1 Hz, 2H), 3.78 (t, *J* = 4.9 Hz, 2H), 3.49 (s, 3H), 2.56 (s, 3H), 0.85 (t, *J* = 7.1 Hz, 3H).

**<sup>13</sup>C NMR (100 MHz, CDCl<sub>3</sub>)** δ 167.23, 166.31, 161.05, 156.36, 155.55, 148.07, 147.48, 145.04, 134.87, 134.17, 132.77, 130.18, 129.87, 129.08, 128.38, 127.35, 127.05, 126.57, 126.28, 126.15, 121.99, 73.04, 68.32, 61.41, 52.23, 46.63, 23.18, 13.44.

**HRMS:** C<sub>28</sub>H<sub>27</sub>ClN<sub>3</sub>O<sub>6</sub> [M+H]<sup>+</sup>; calculated: 536.1588, found: 536.1589.

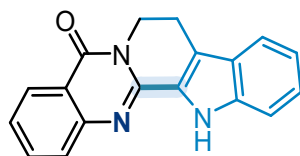

55

**Rutaecarpine**

The product was purified by column chromatography on silica gel (eluent: 1:1 petroleum ether: ethyl acetate) as a white solid (69 mg, 80%).

**<sup>1</sup>H NMR (400 MHz, DMSO-*d*<sub>6</sub>)** δ 11.87 (s, 1H), 8.16 (dd, *J* = 7.9, 1.3 Hz, 1H), 7.83 – 7.79 (m, 1H), 7.69 – 7.63 (m, 2H), 7.50 – 7.45 (m, 2H), 7.28 – 7.24 (m, 1H), 7.09 (t, *J* = 7.8 Hz, 1H), 4.45 (t, *J* = 6.9 Hz, 2H), 3.17 (t, *J* = 6.9 Hz, 2H).

**<sup>13</sup>C NMR (100 MHz, DMSO-*d*<sub>6</sub>)** δ 160.68, 147.45, 145.37, 138.74, 134.49, 127.18, 126.67, 126.52, 126.05, 124.97, 124.81, 120.79, 120.03, 119.81, 117.93, 112.64, 40.90, 19.03.

(Known compound: *Org. Chem. Front.*, 2020, 7, 2499-2504).

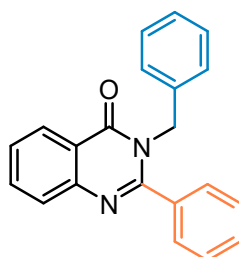

S37

**3-benzyl-2-phenylquinazolin-4(3H)-one**

The product was purified by column chromatography on silica gel (eluent: 5:1 petroleum ether: ethyl acetate) as a white solid (78 mg, 83%).

**<sup>1</sup>H NMR (400 MHz, CDCl<sub>3</sub>)** δ 8.38 (d, *J* = 8.3 Hz, 1H), 7.82 – 7.75 (m, 2H), 7.56 – 7.51 (m, 1H), 7.47 (t, *J* = 7.3 Hz, 1H), 7.40 (t, *J* = 7.5 Hz, 2H), 7.36 – 7.32 (m, 2H), 7.25 – 7.16 (m, 3H), 6.93 (dd, *J* = 6.5, 2.9 Hz, 2H), 5.28 (s, 2H).

**<sup>13</sup>C NMR (100 MHz, CDCl<sub>3</sub>)** δ 162.53, 156.44, 147.32, 136.63, 135.32, 134.63, 129.96, 128.66, 128.58, 128.06, 127.66, 127.50, 127.23, 127.17, 127.03, 120.92, 48.87.

(Known compound: *Green Chem.*, 2024, **26**, 4723-4732)



## VIII. Supplementary References

- 1 J. A. Pollock, *Tetrahedron Letters.*, 2015, **56**, 6097–6099.
- 2 T. B. Nguyen, L. Ermolenko and A. Al-Mourabit, *Green Chem.*, 2016, **18**, 2966–2970.
- 3 Z. Qu, X. Ji, S. Tang, G. J. Deng and H. Huang, *Org. Lett.*, 2022, **24**, 7173–7177.
- 4 C. Lu, Z. Su, D. Jing, S. Jin, L. Xie, L. Li and K. Zheng, *Org. Lett.*, 2019, **21**, 1438–1443.
- 5 Y. Bao, Z. Deng, J. Feng, W. Zhu, J. Li, J. Wan and G. Liu, *Org. Lett.*, 2020, **22**, 6277–6282.
- 6 J. Luo, J. Wan, L. Wu, L. Yang and T. Wang, *J. Org. Chem.*, 2022, **87**, 9864–9874.
- 7 A. K. Wortman and C. R. J. Stephenson, *Chem*, 2023, **9**, 2390–2415.
- 8 T. Song, P. Ren, Z. Ma, J. Xiao and Y. Yang, *ACS Sustainable Chem. Eng.*, 2020, **8**, 267–277.
- 9 K. Chakrabarti, M. Maji and S. Kundu, *Green Chem.*, 2019, **21**, 1999–2004.
- 10 Y. Zhou, F. Chen, Z. Li, J. Dong, J. Li, B. Zhang and Q. Song, *Sci. China Chem.*, 2023, **66**, 1975–1981.
- 11 E. C. Gaudino, S. Tagliapietra, G. Palmisano, K. Martina, D. Carnaroglio and G. Cravotto, *ACS Sustainable Chem. Eng.*, 2017, **5**, 9233–9243.

## IX. NMR Spectra

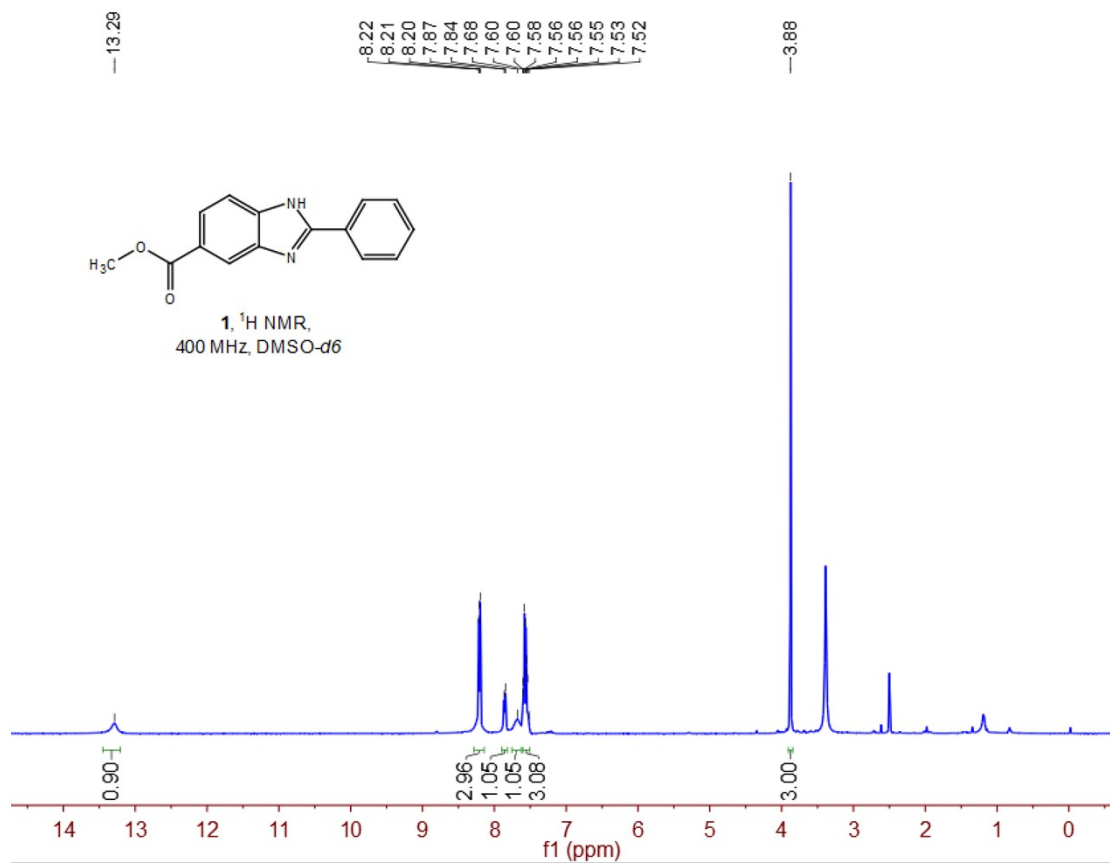

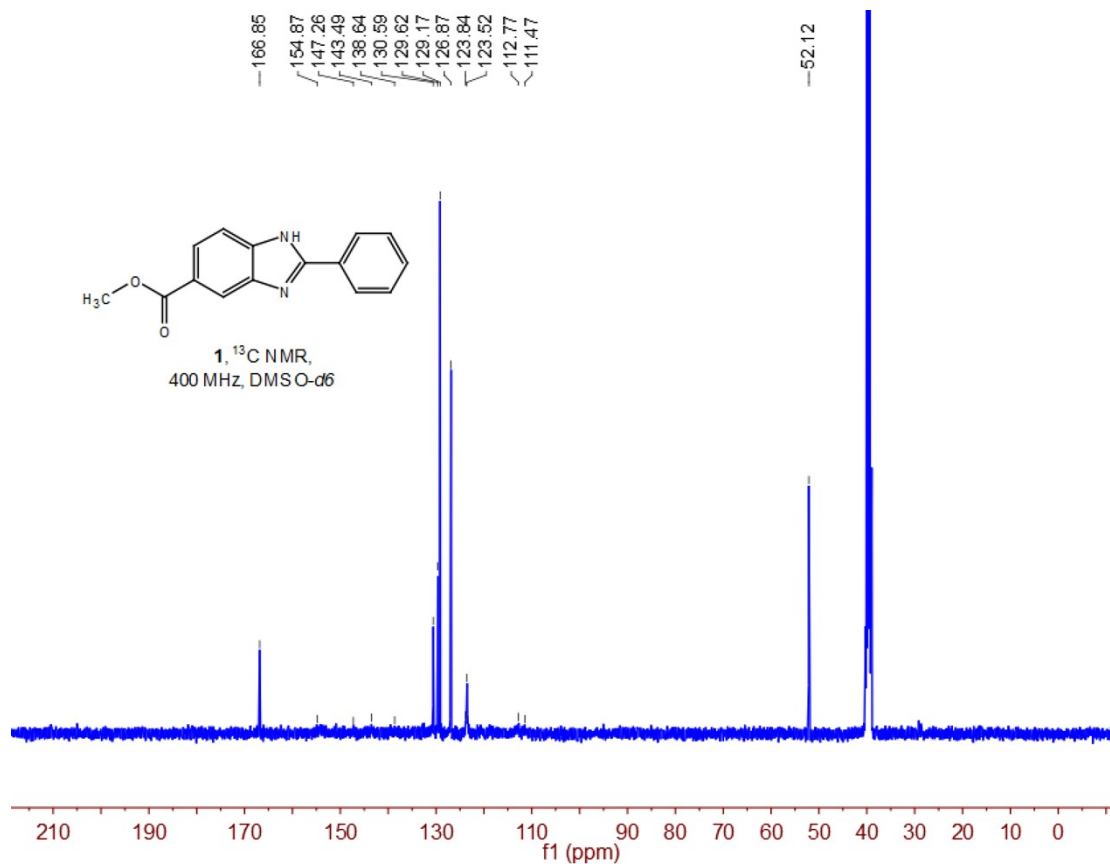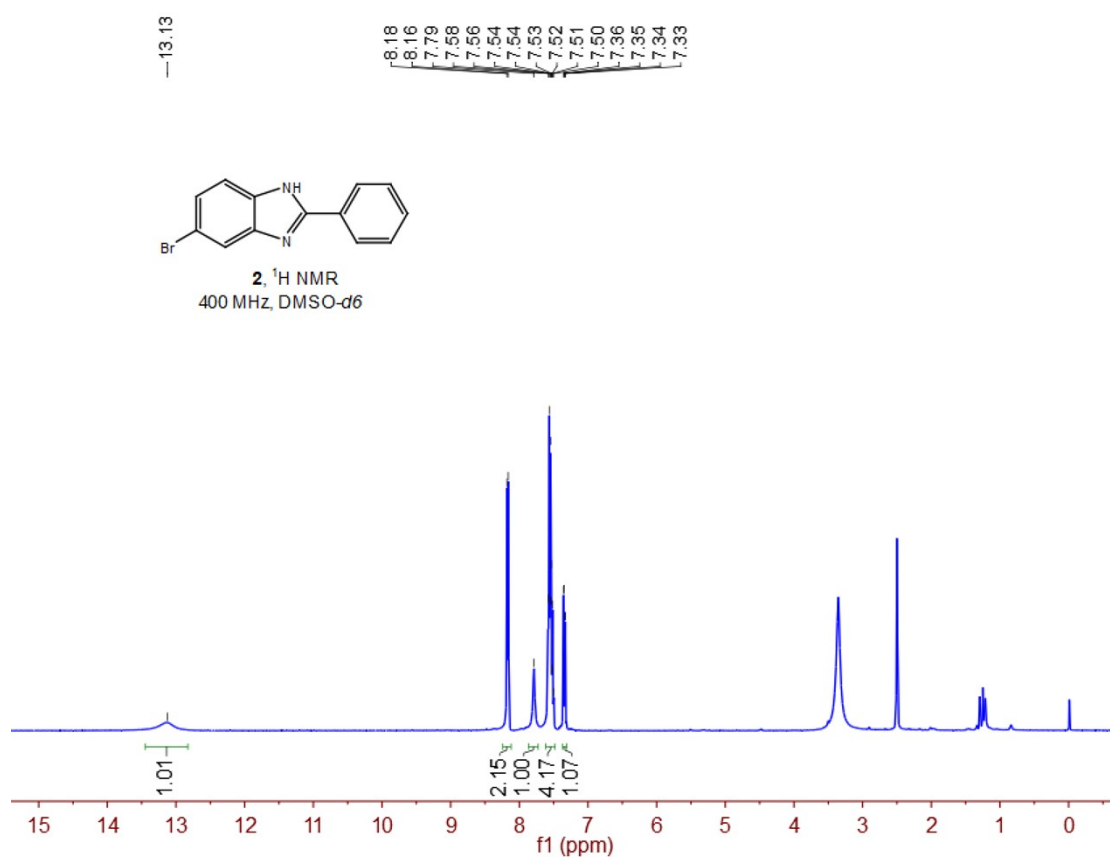

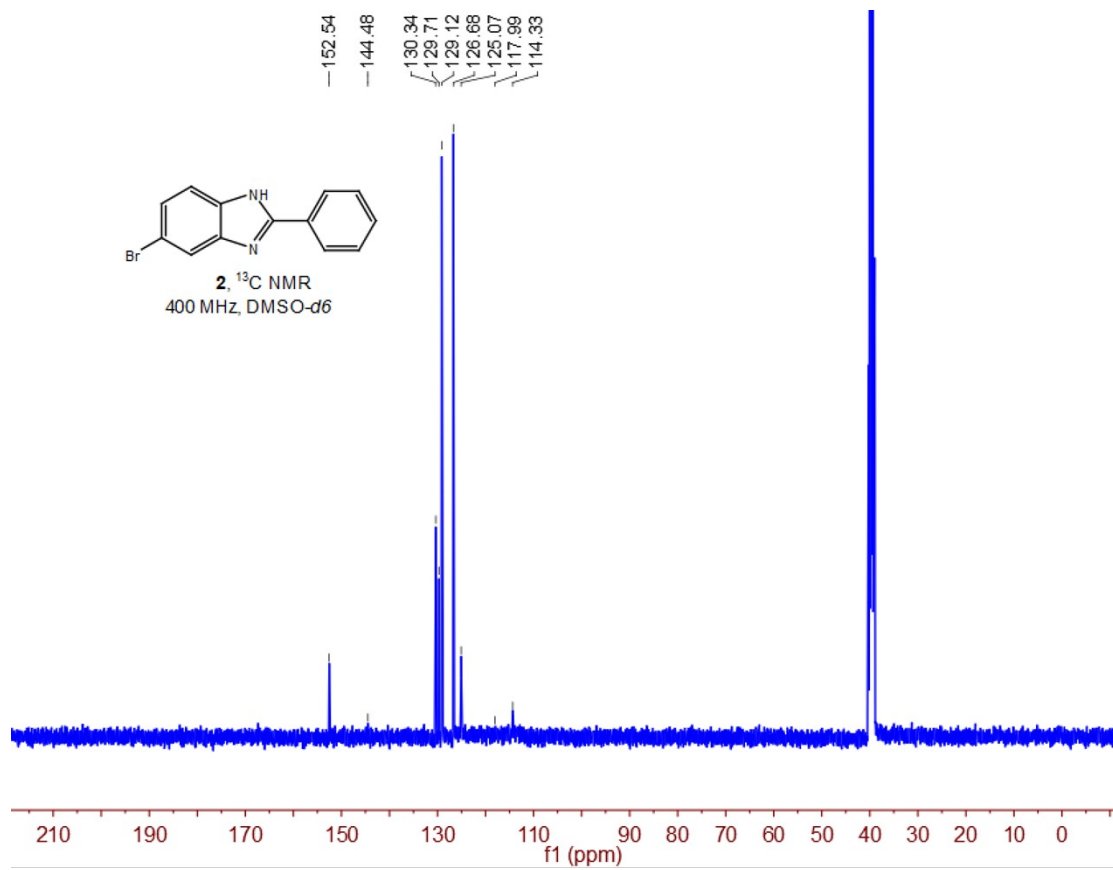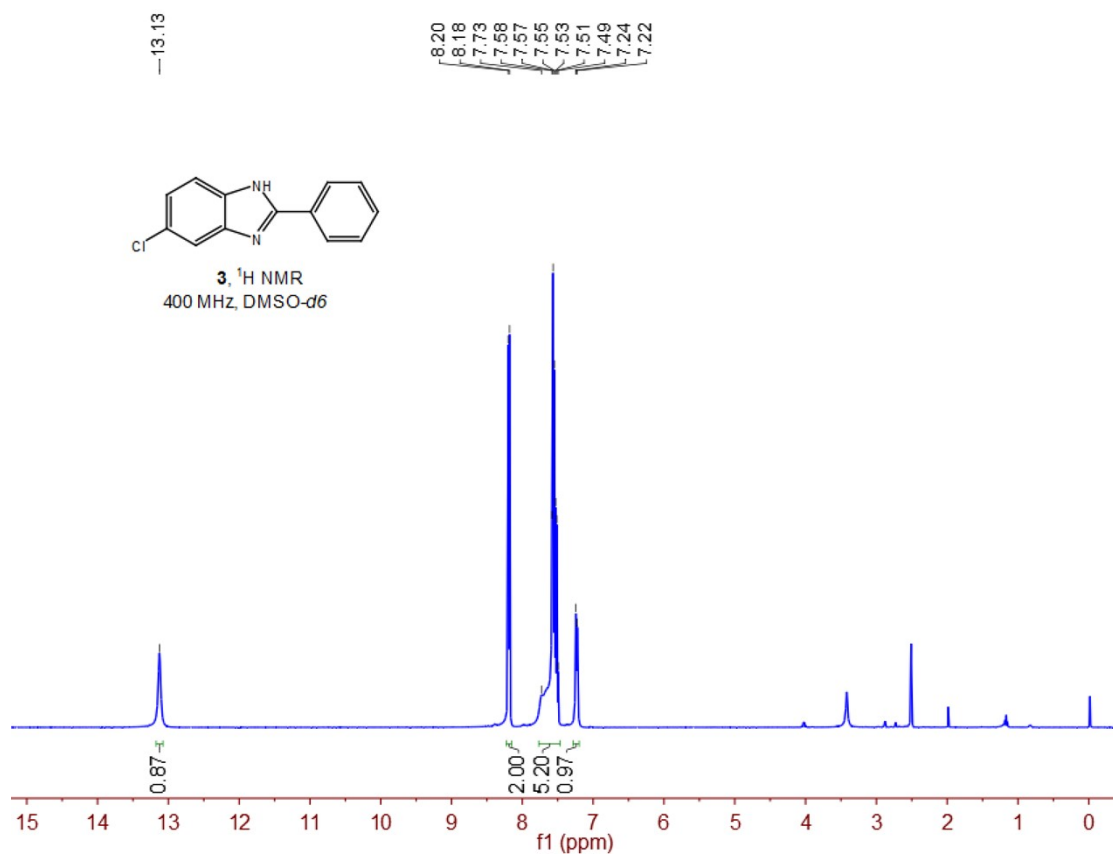

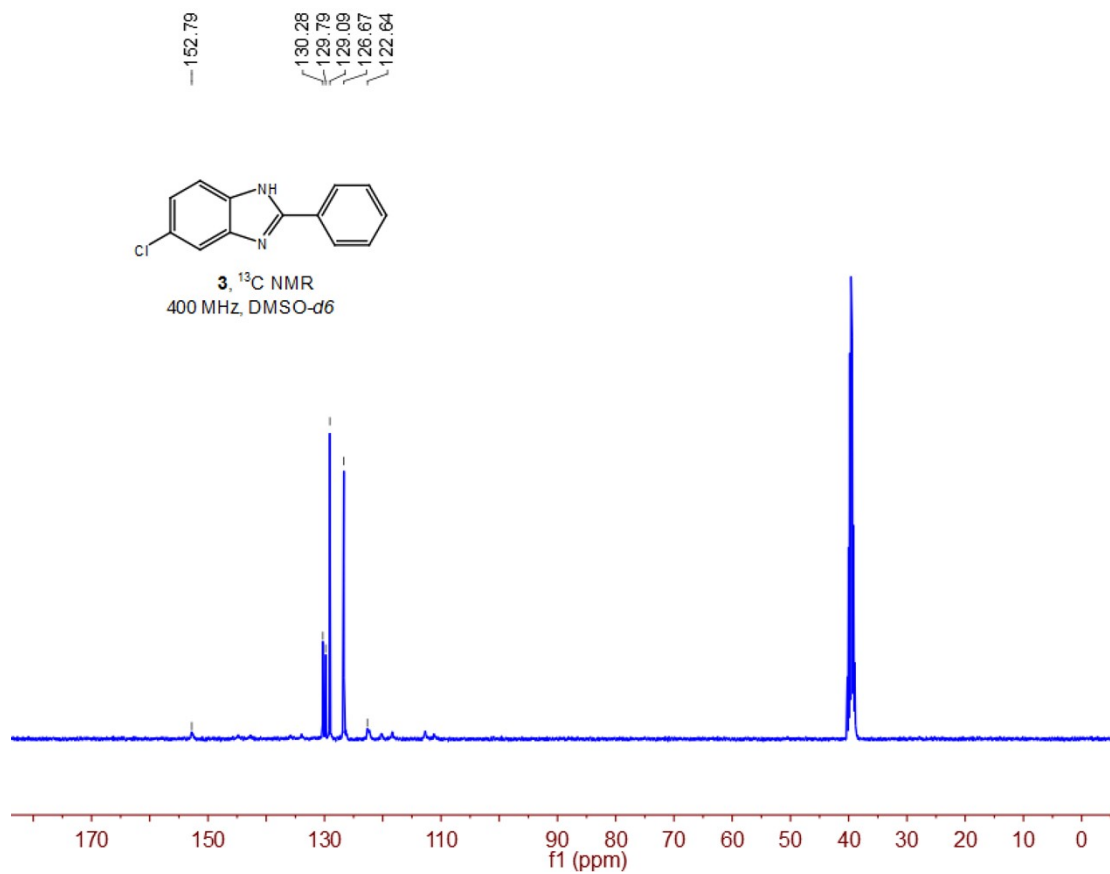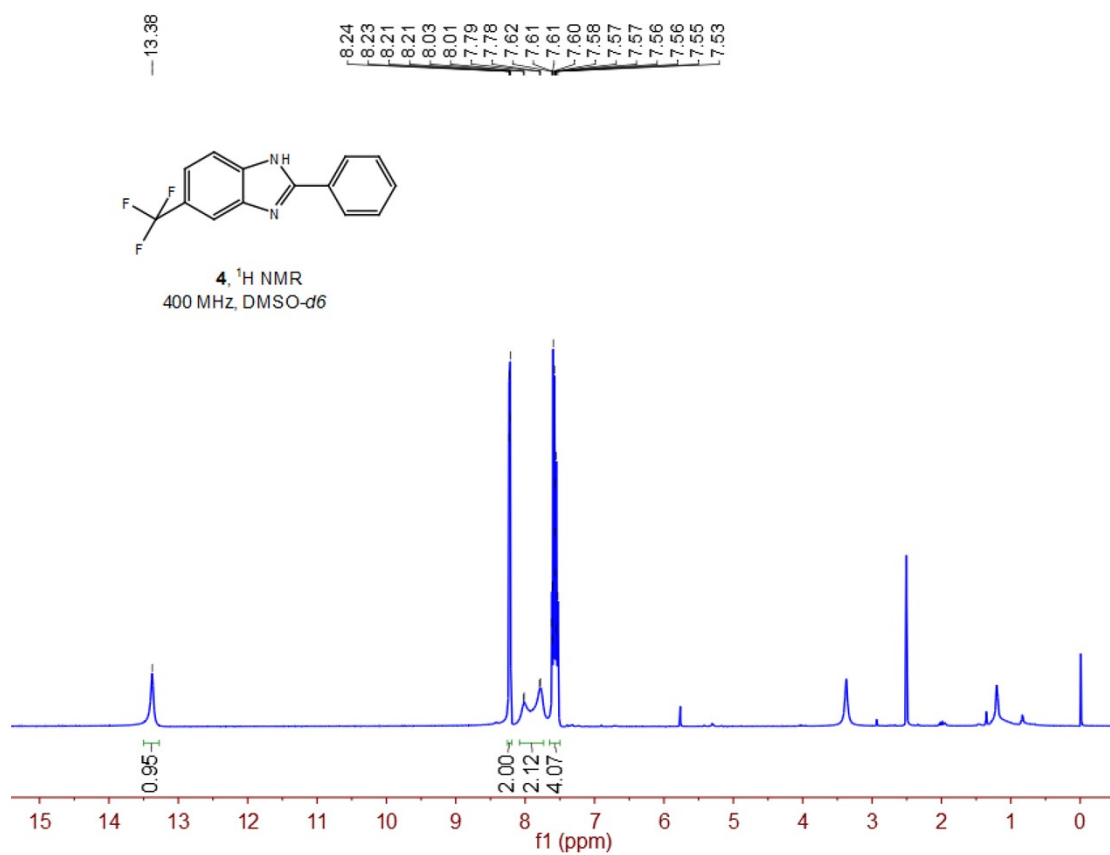

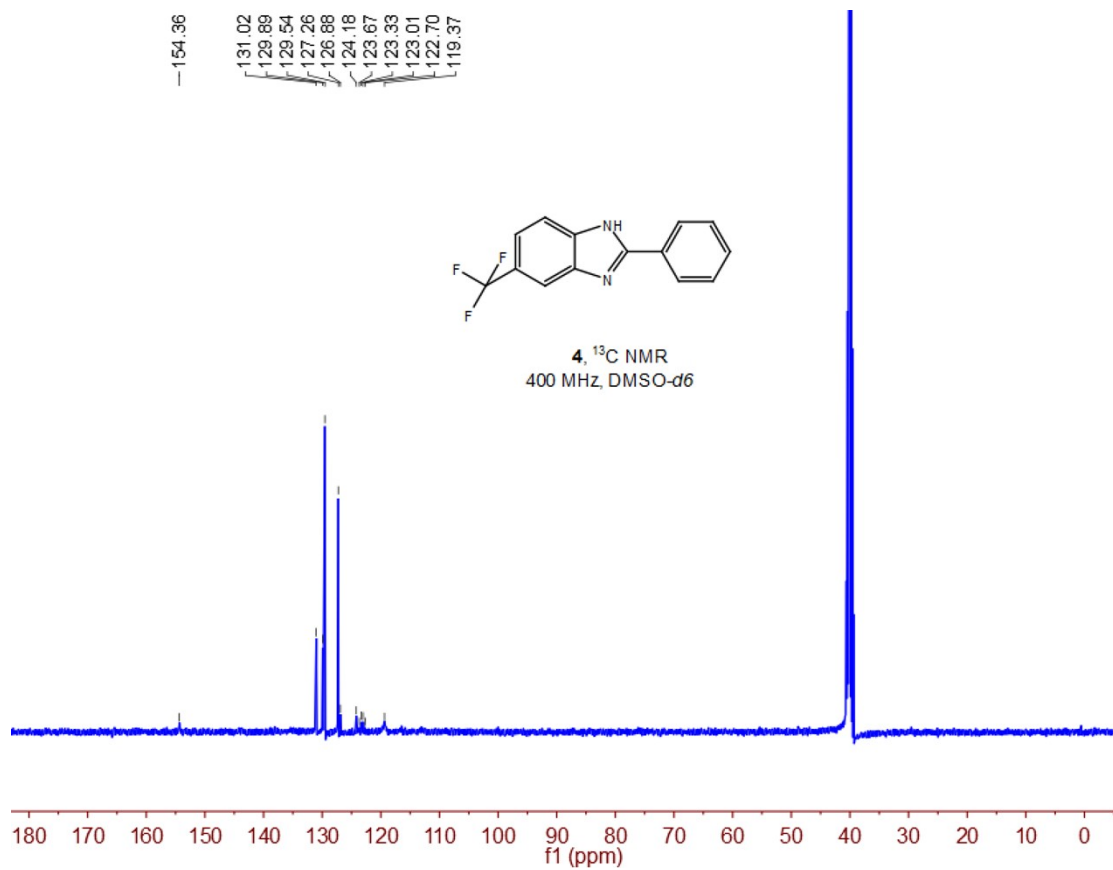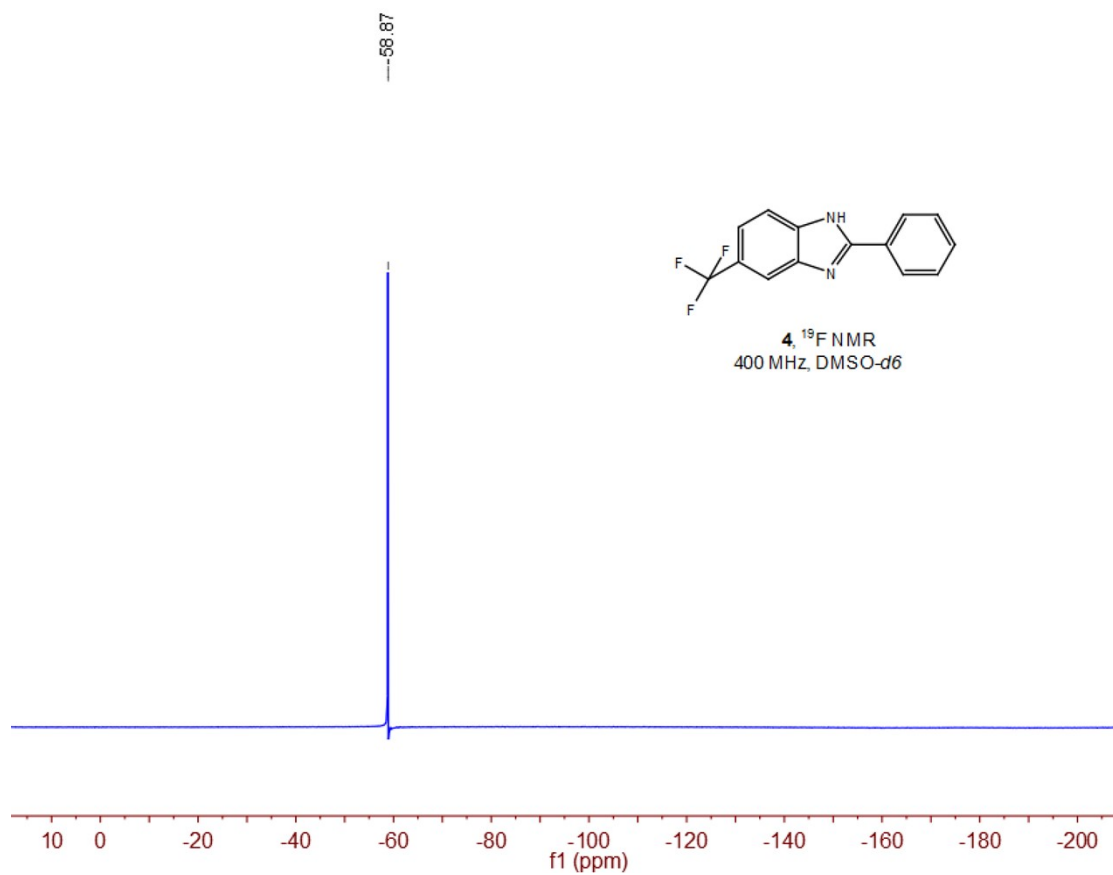

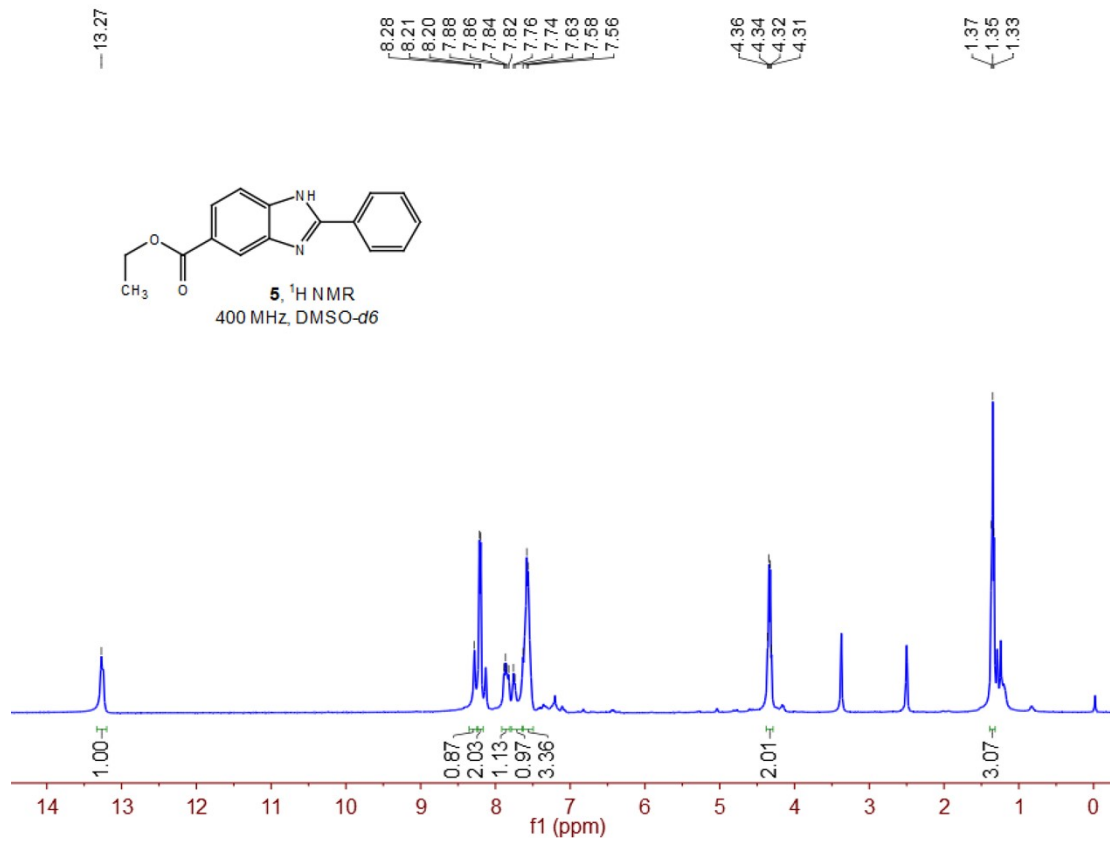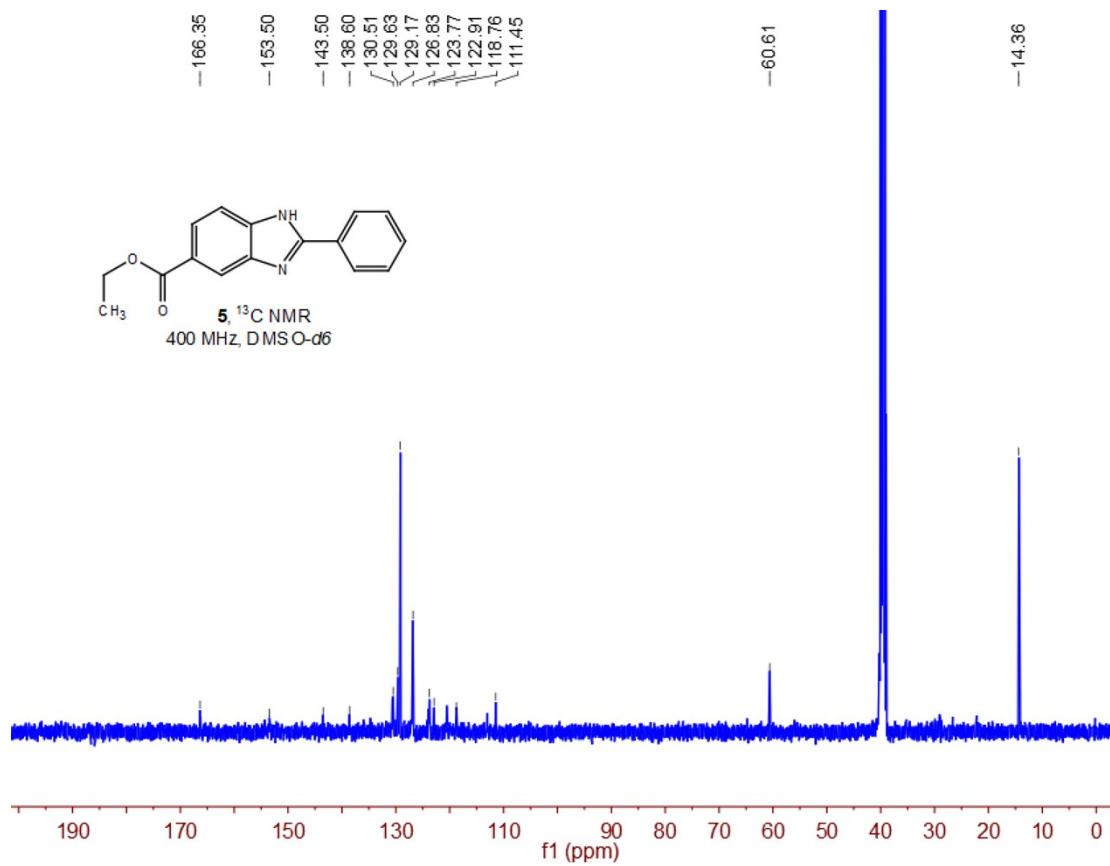

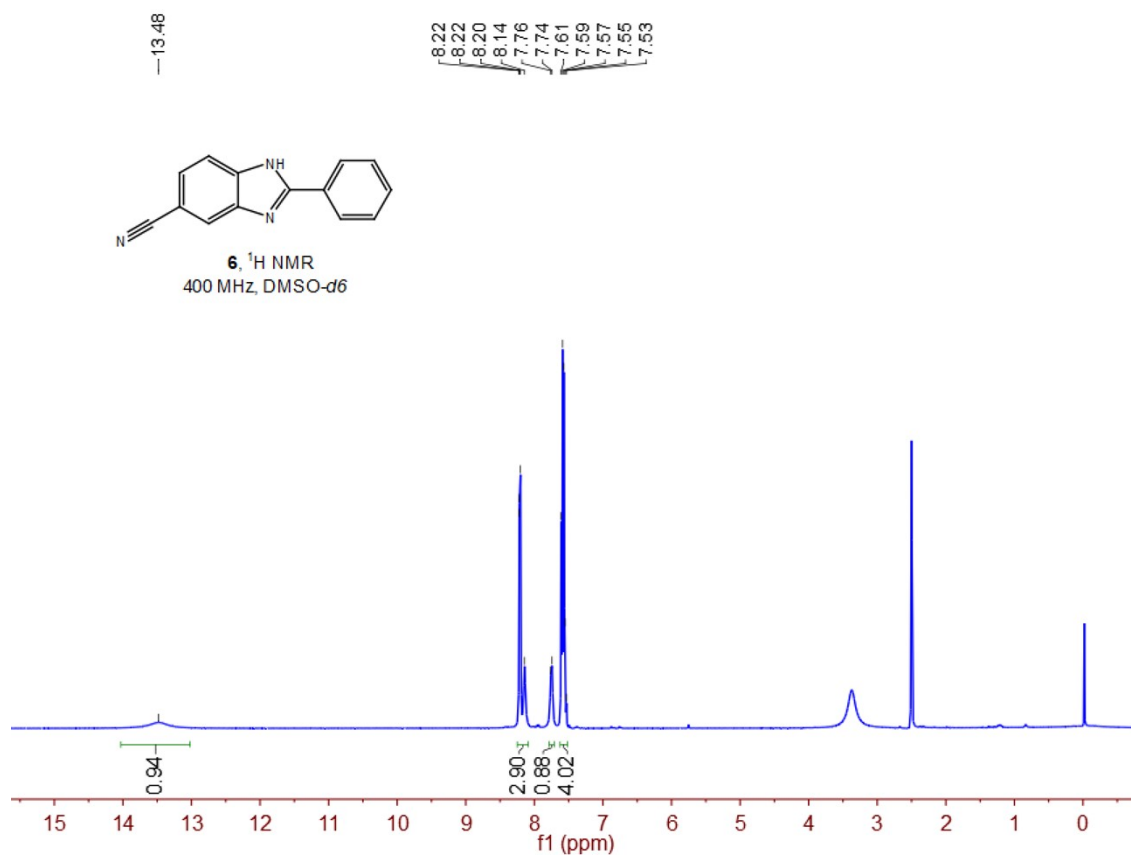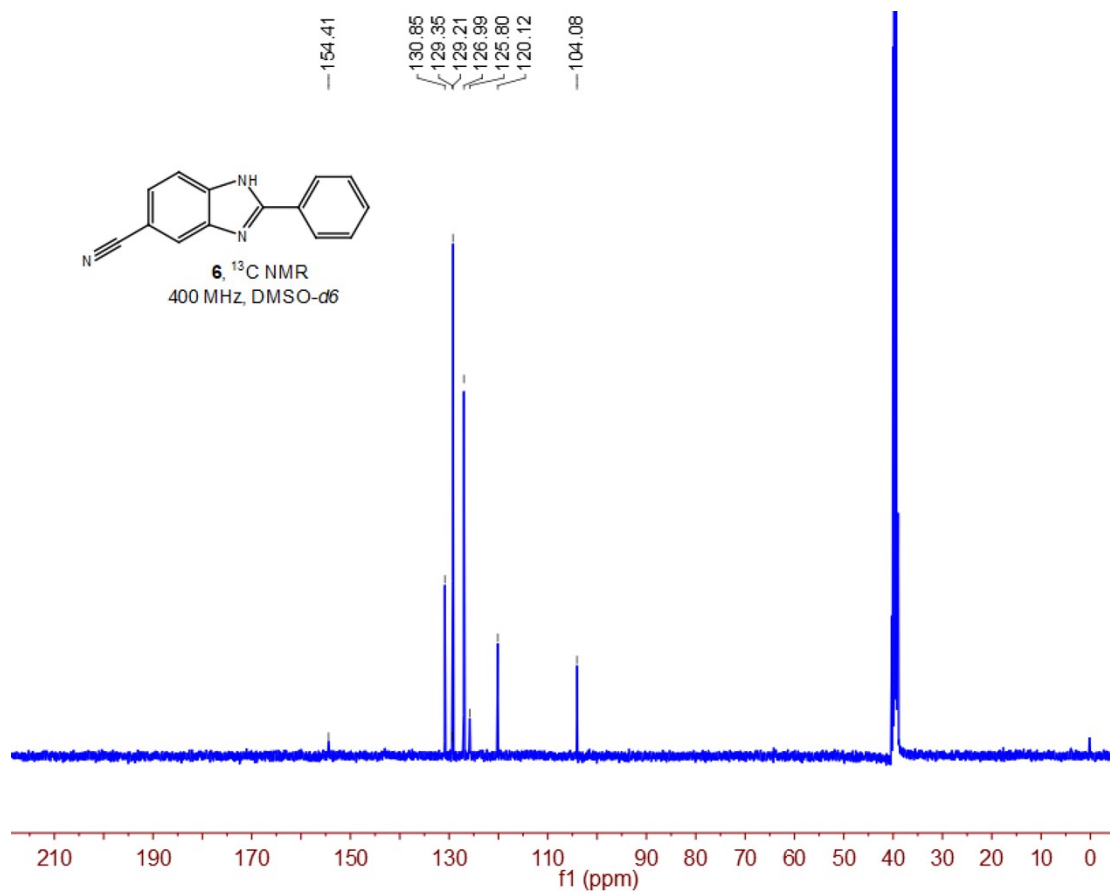



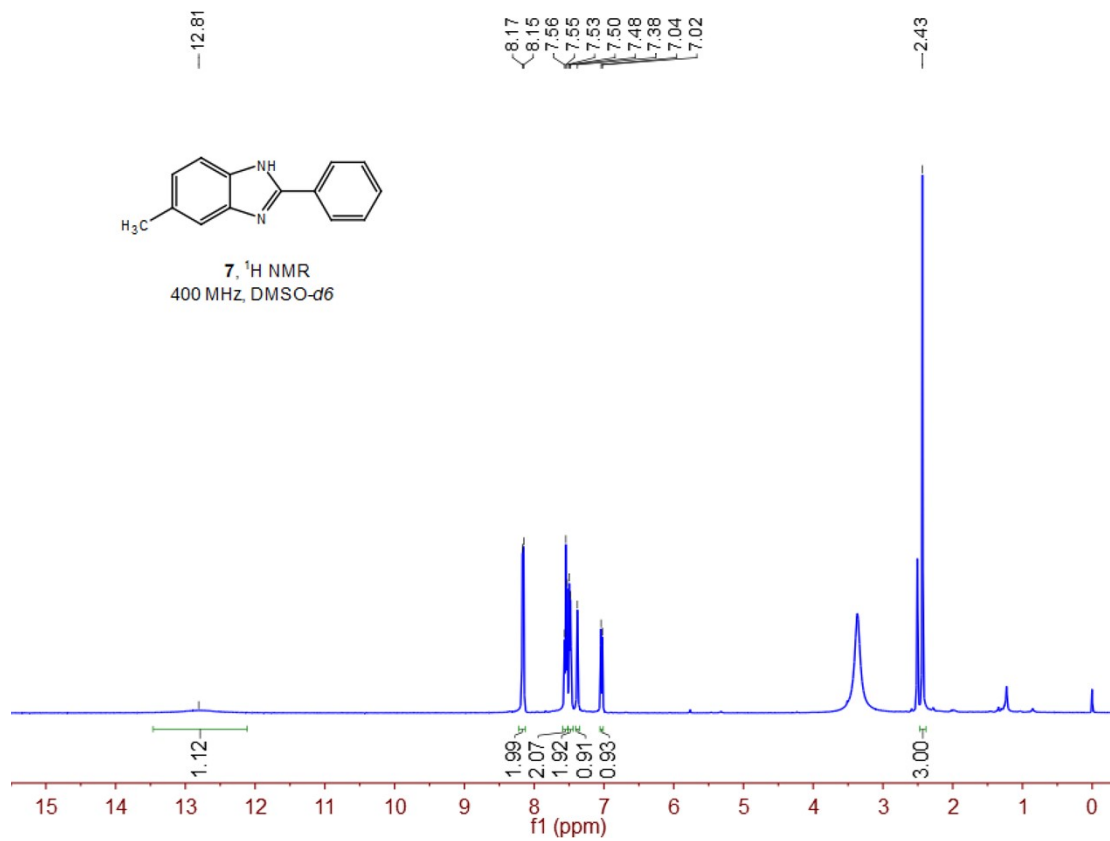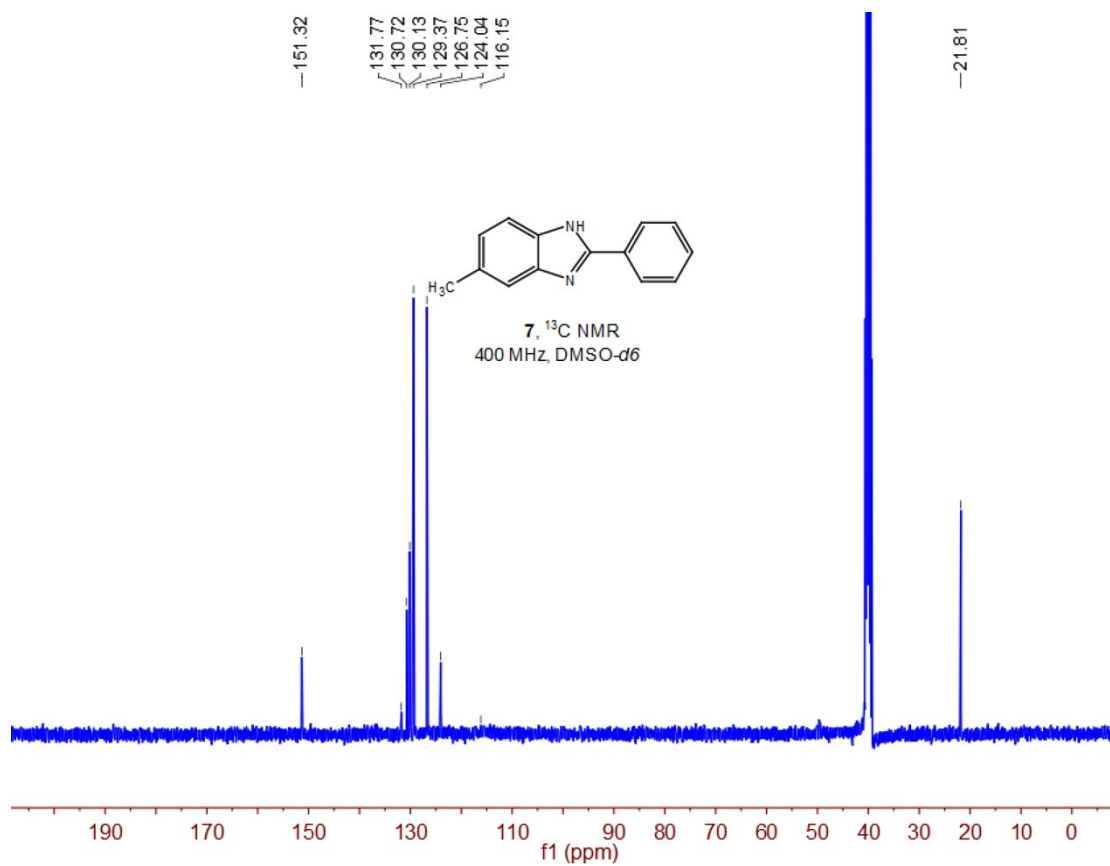

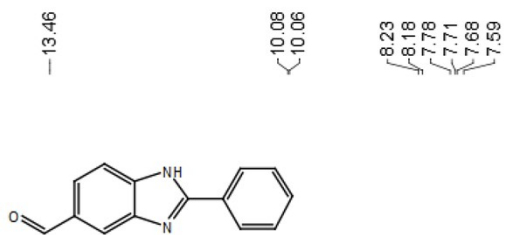

**8**,  $^1\text{H}$  NMR  
400 MHz, DMSO- $d_6$

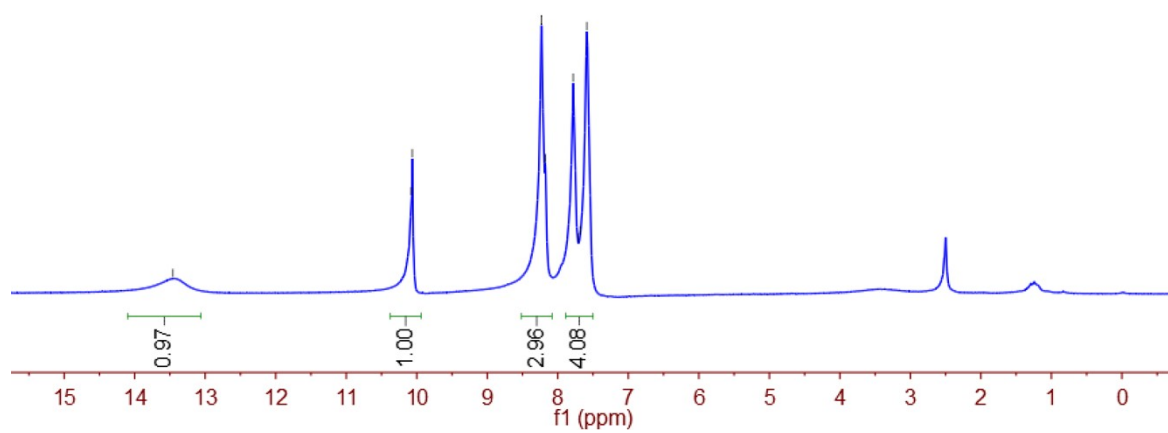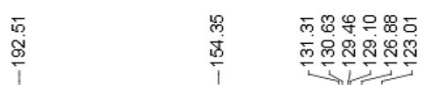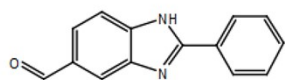

**8**,  $^{13}\text{C}$  NMR  
400 MHz, DMSO- $d_6$

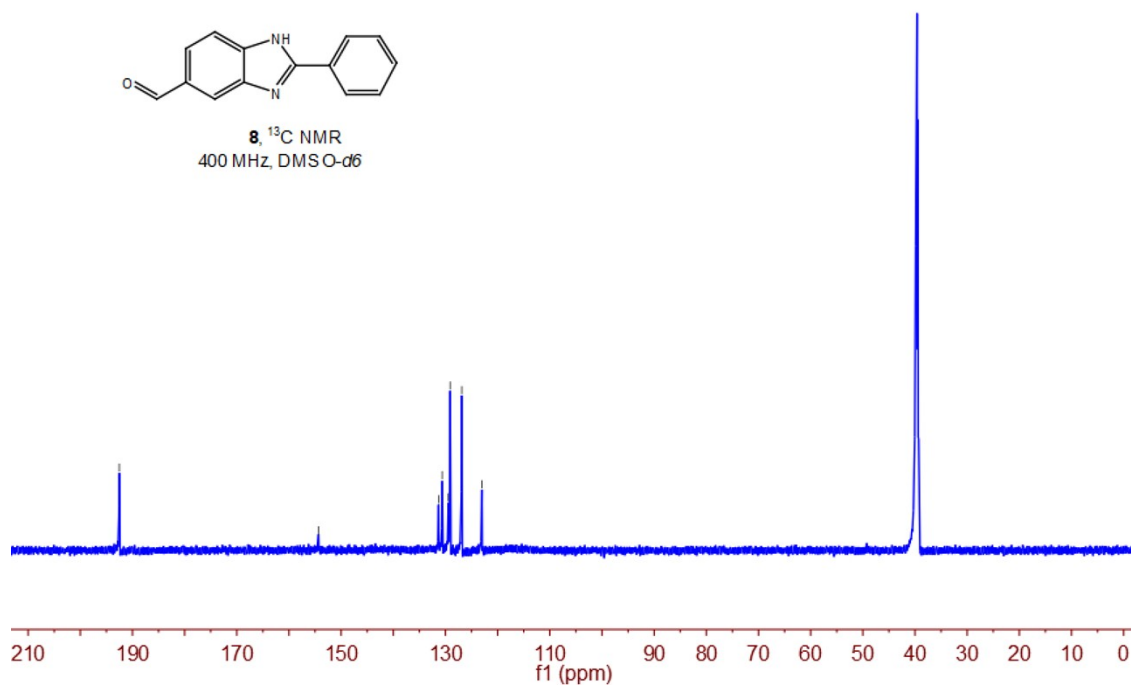

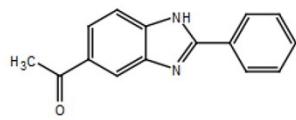

**9** <sup>1</sup>H NMR  
400 MHz, CDCl<sub>3</sub>

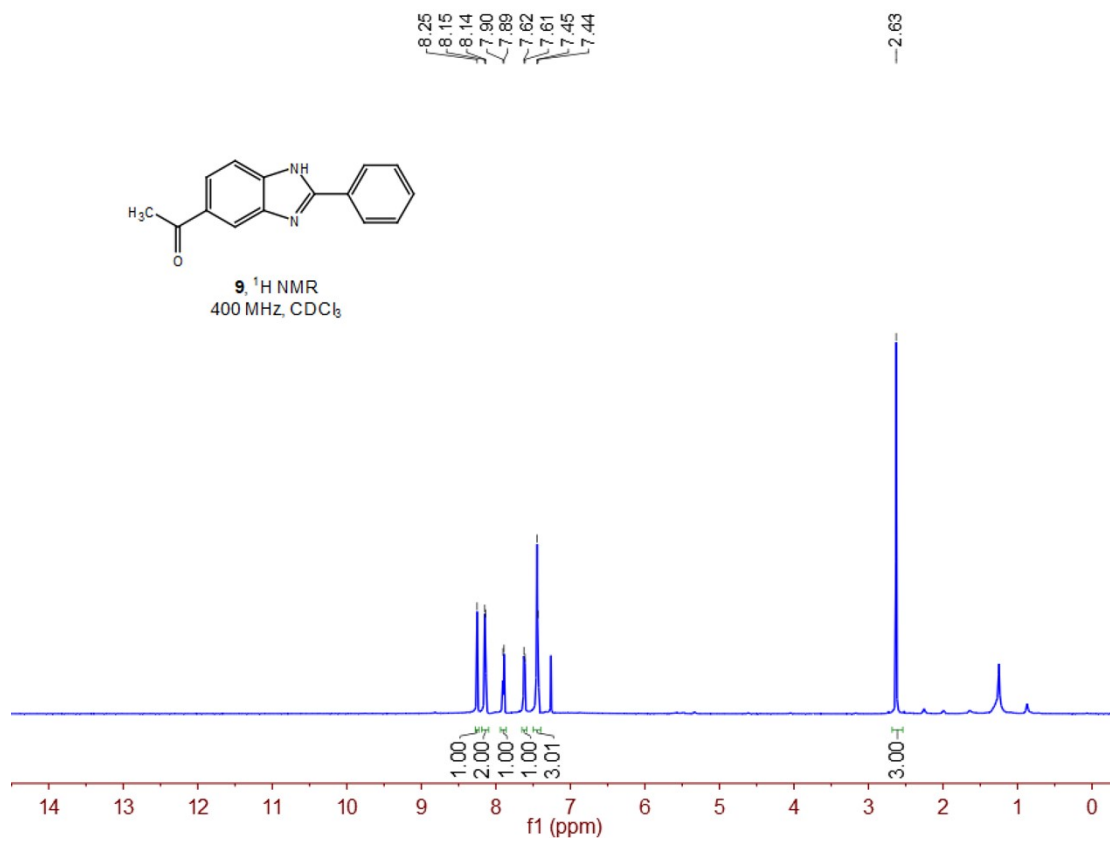

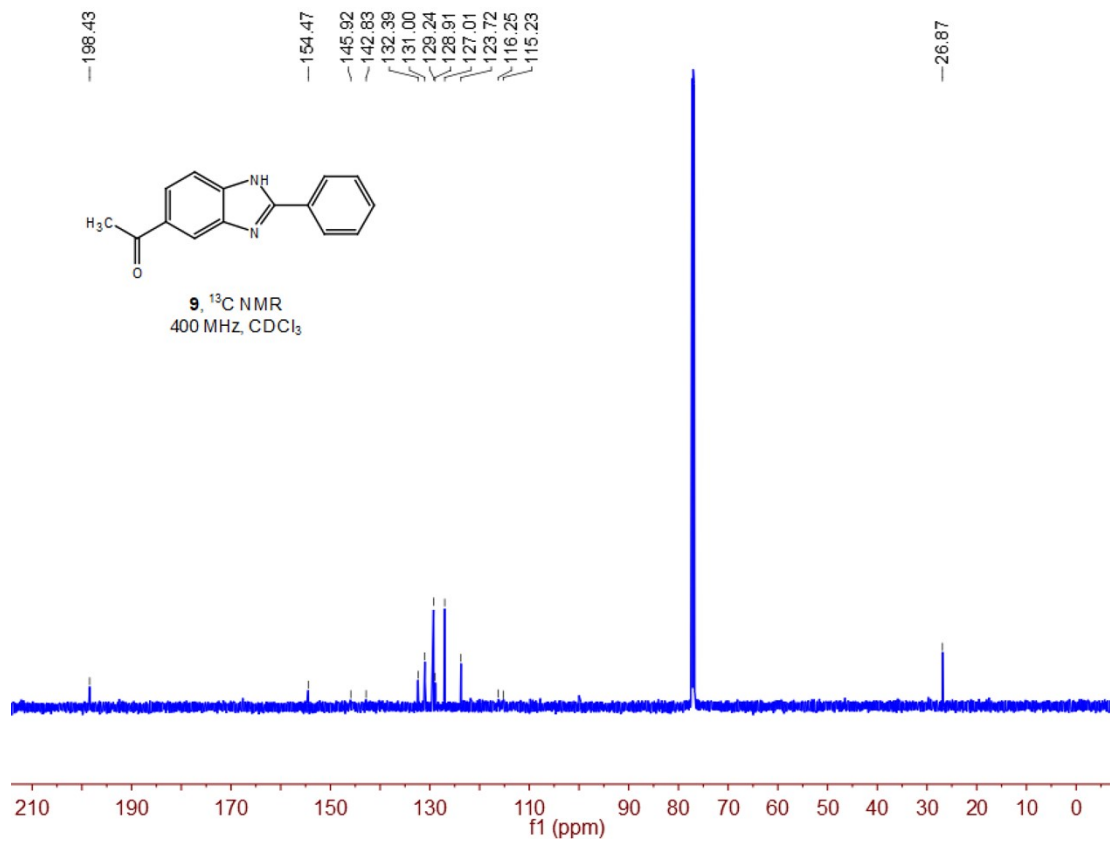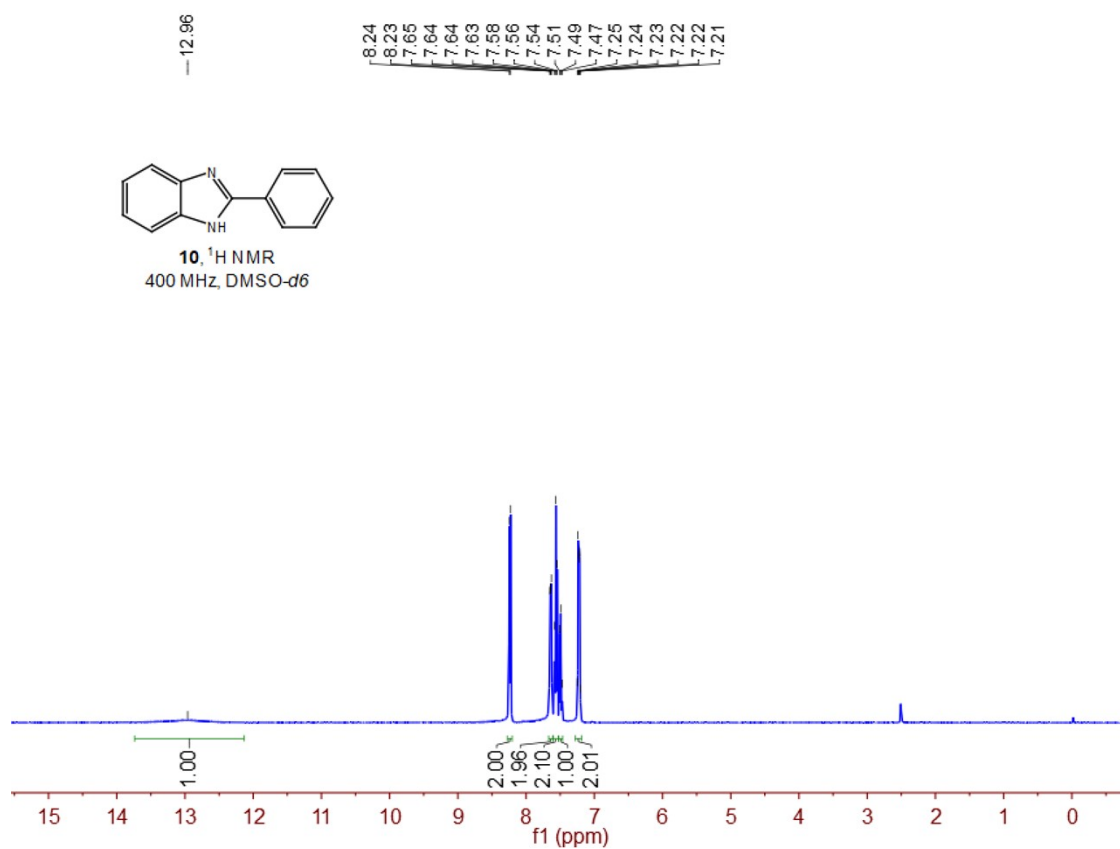

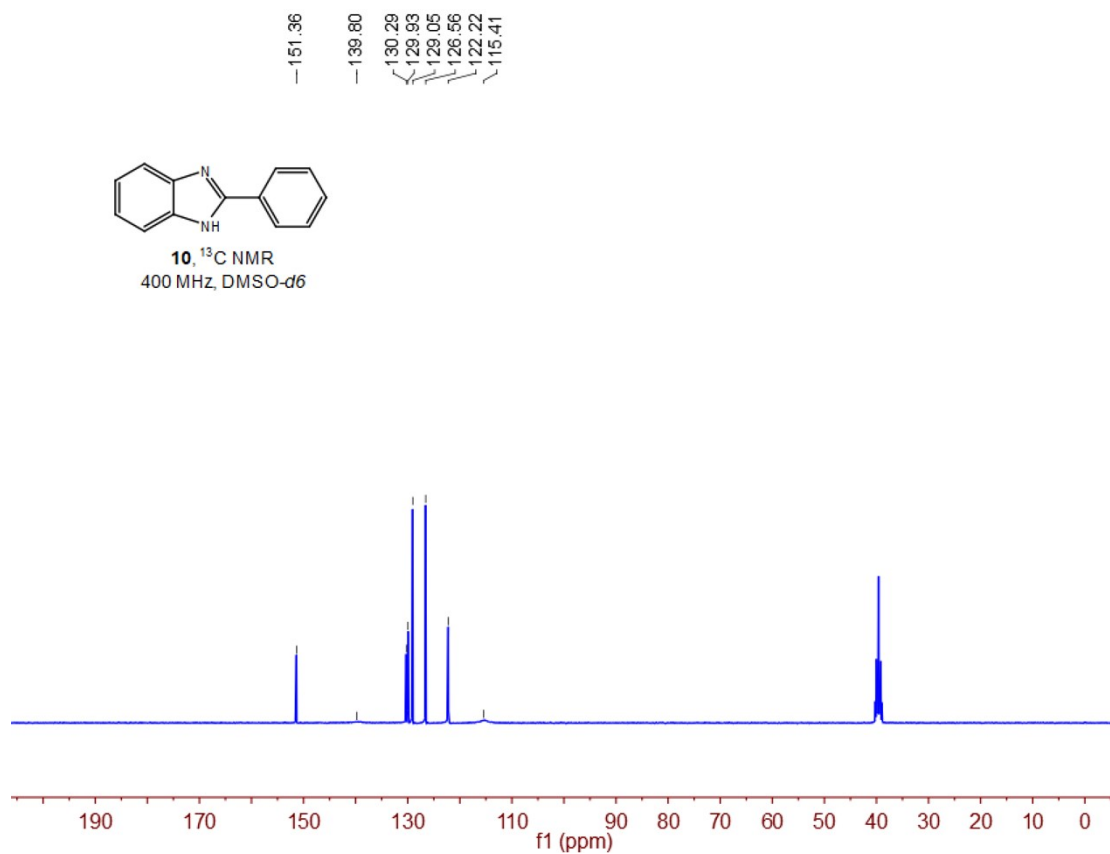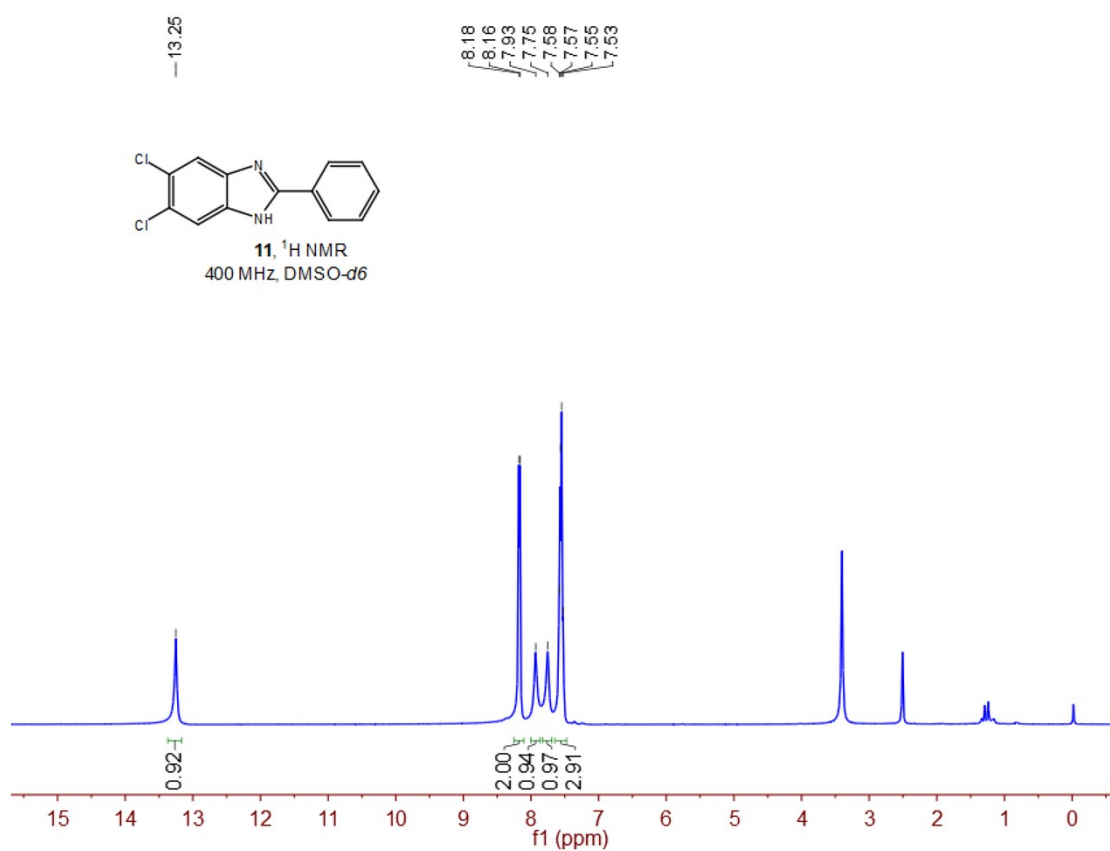

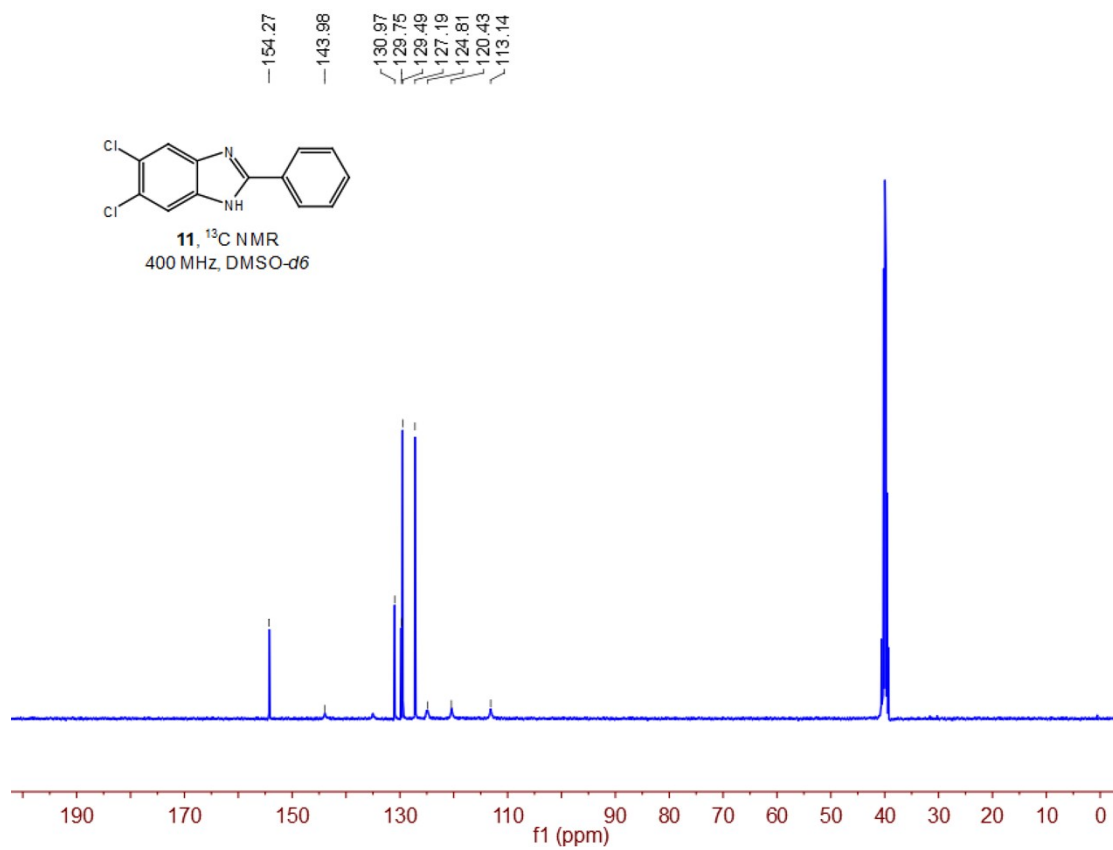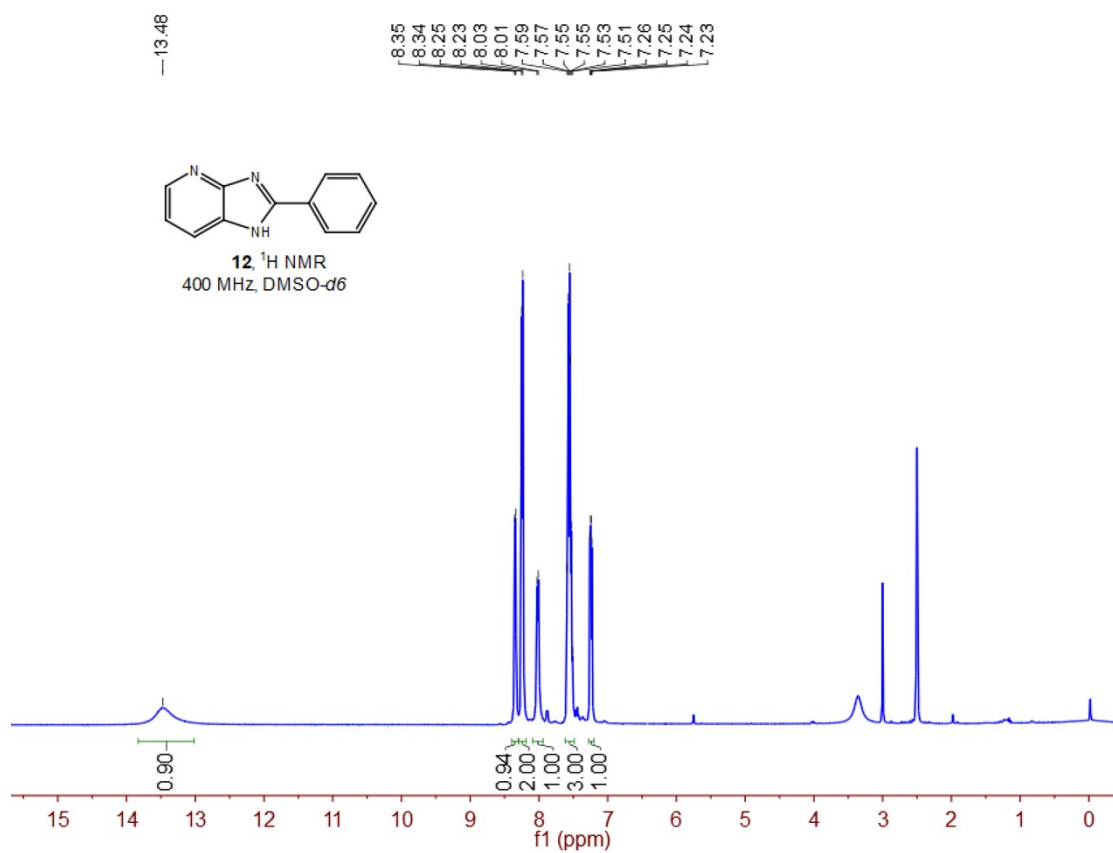

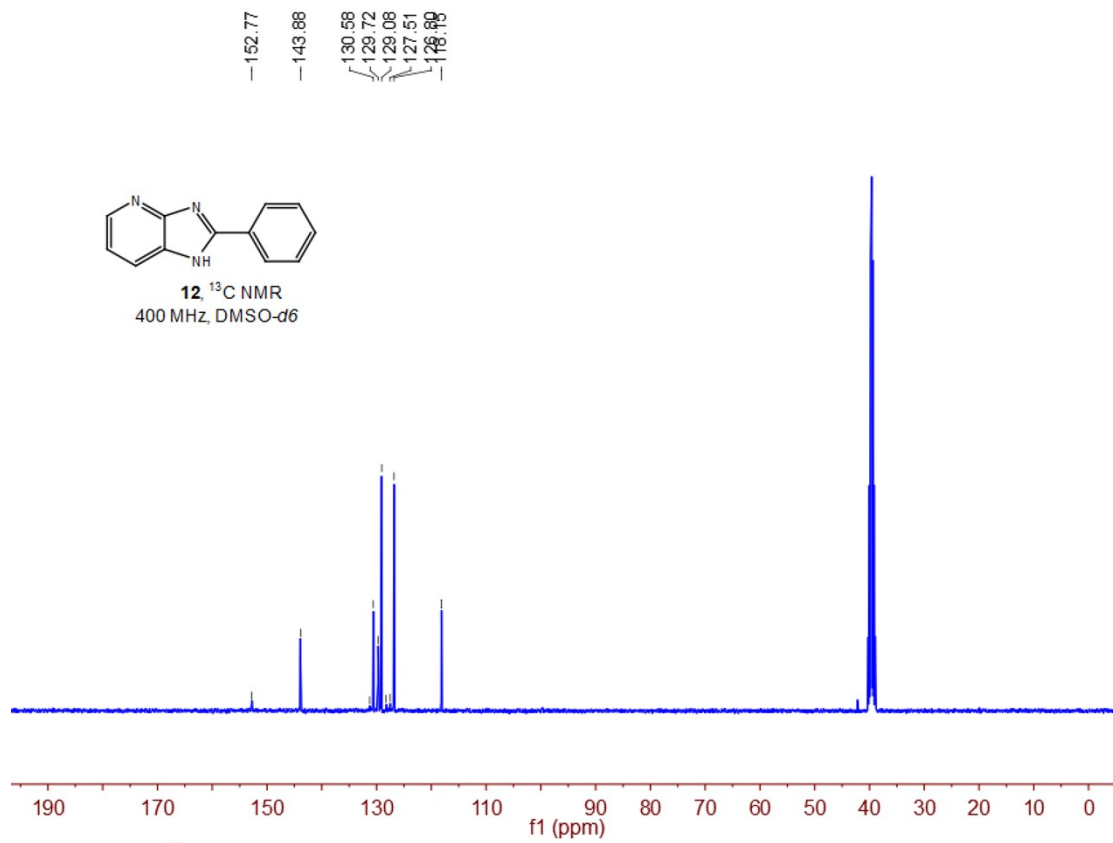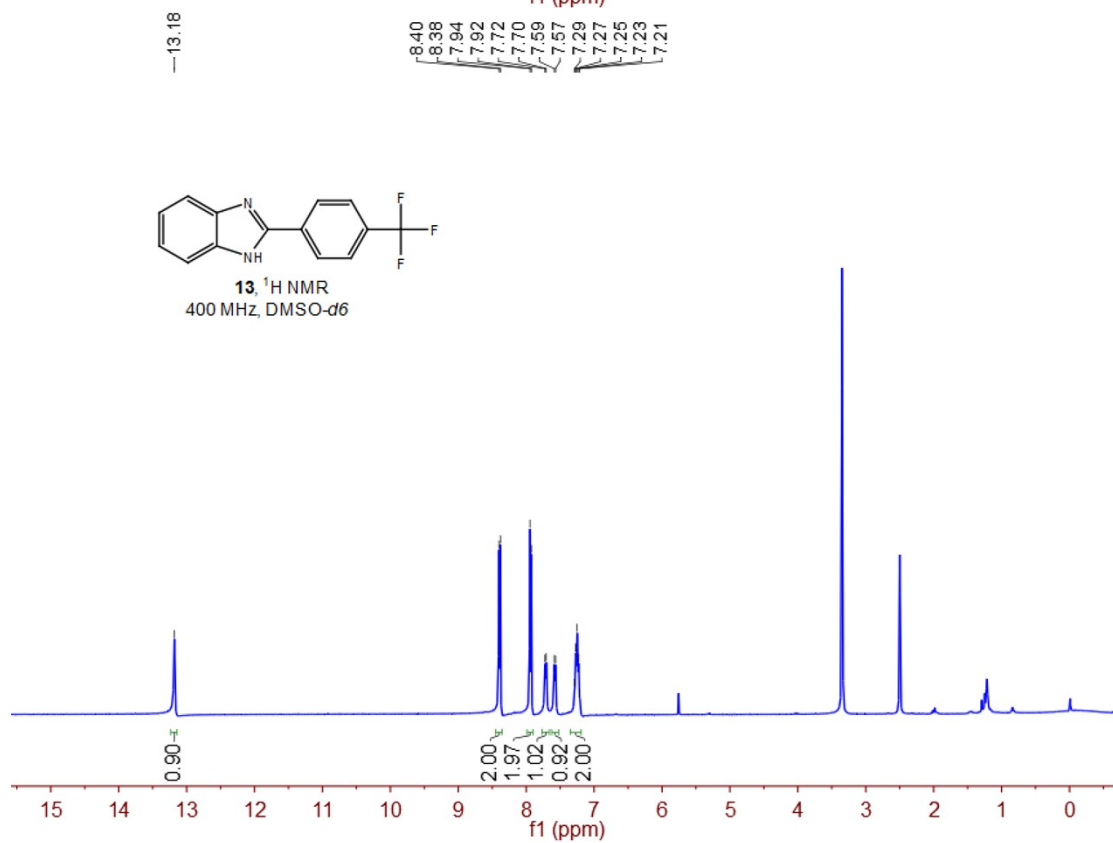

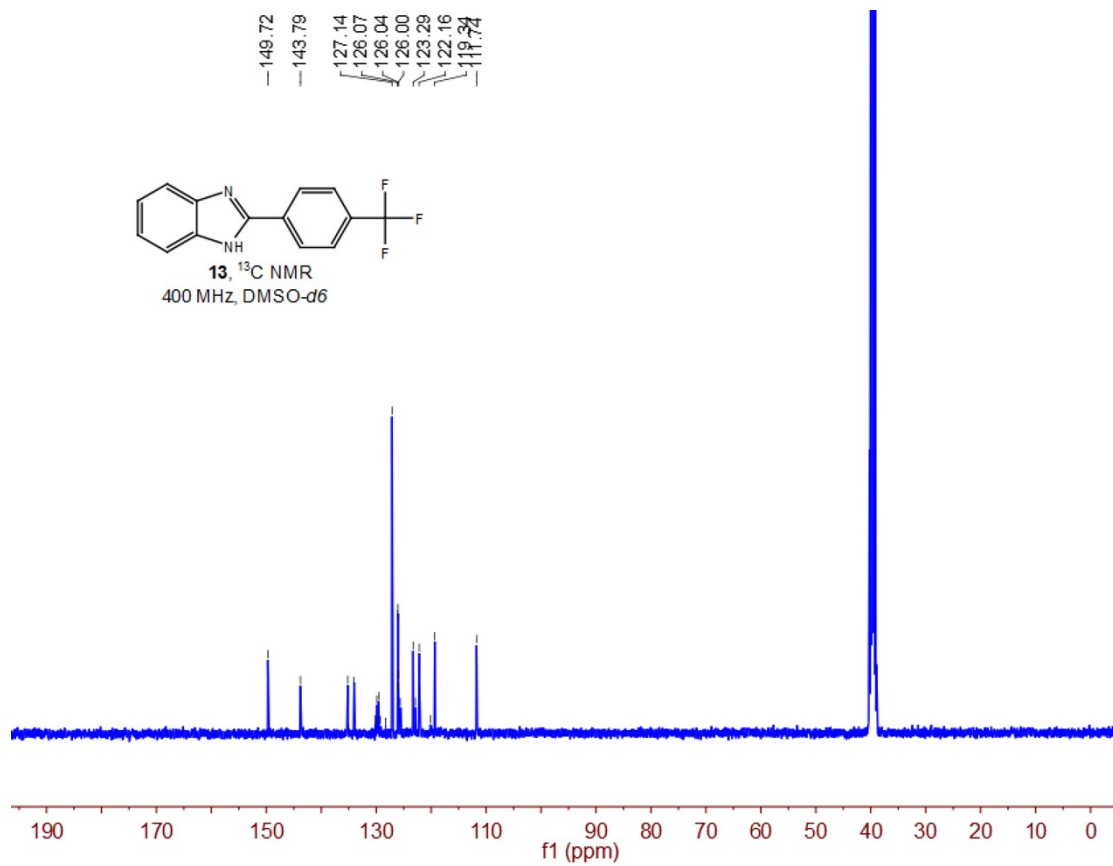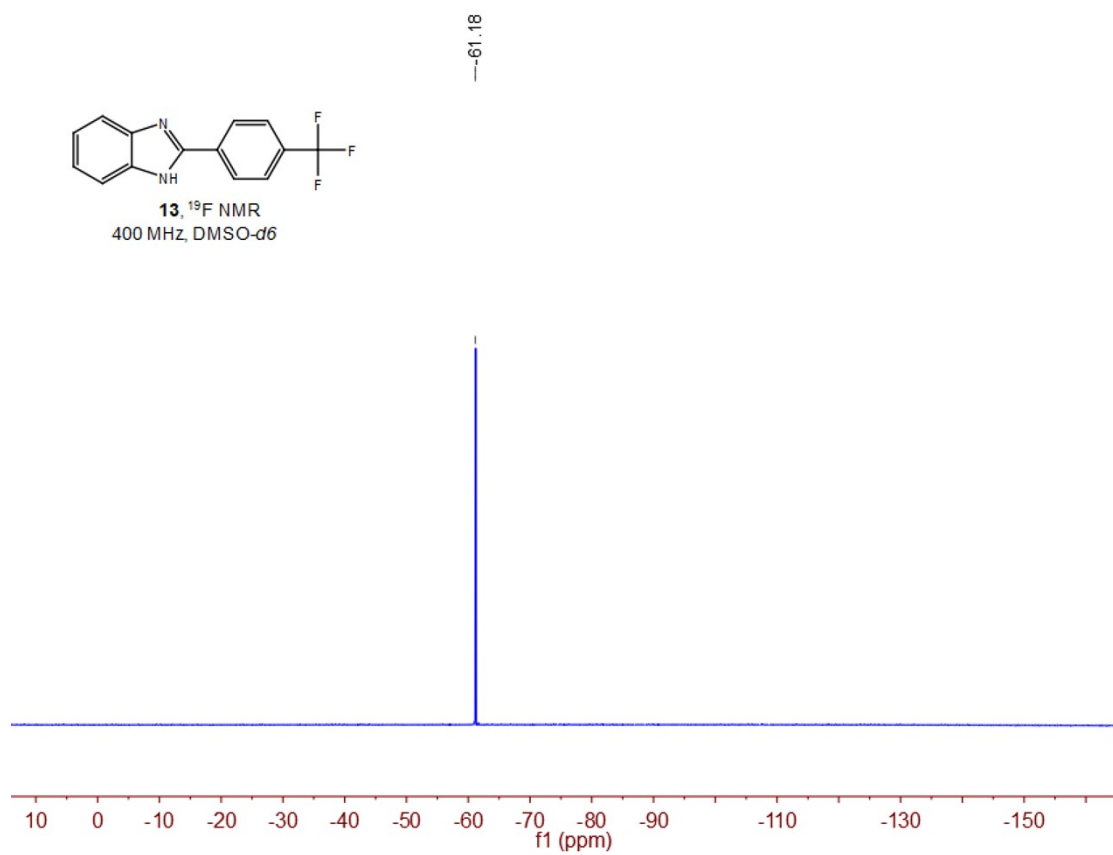



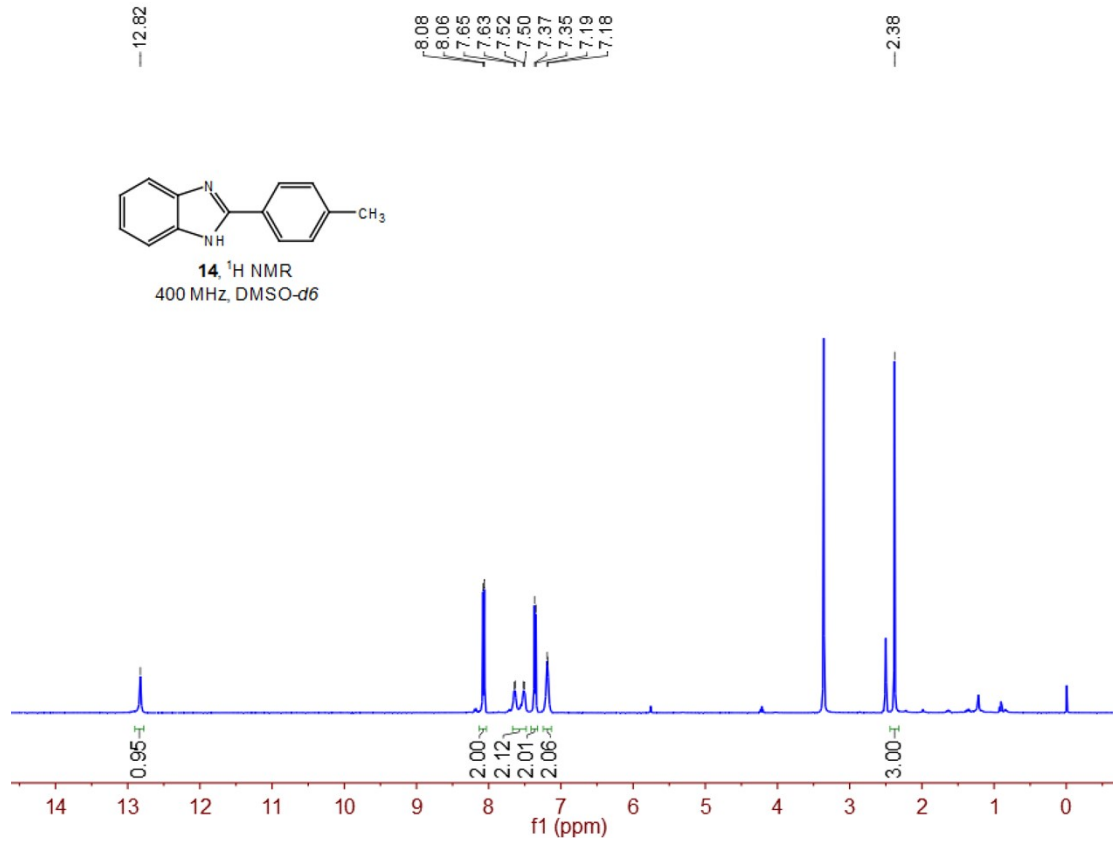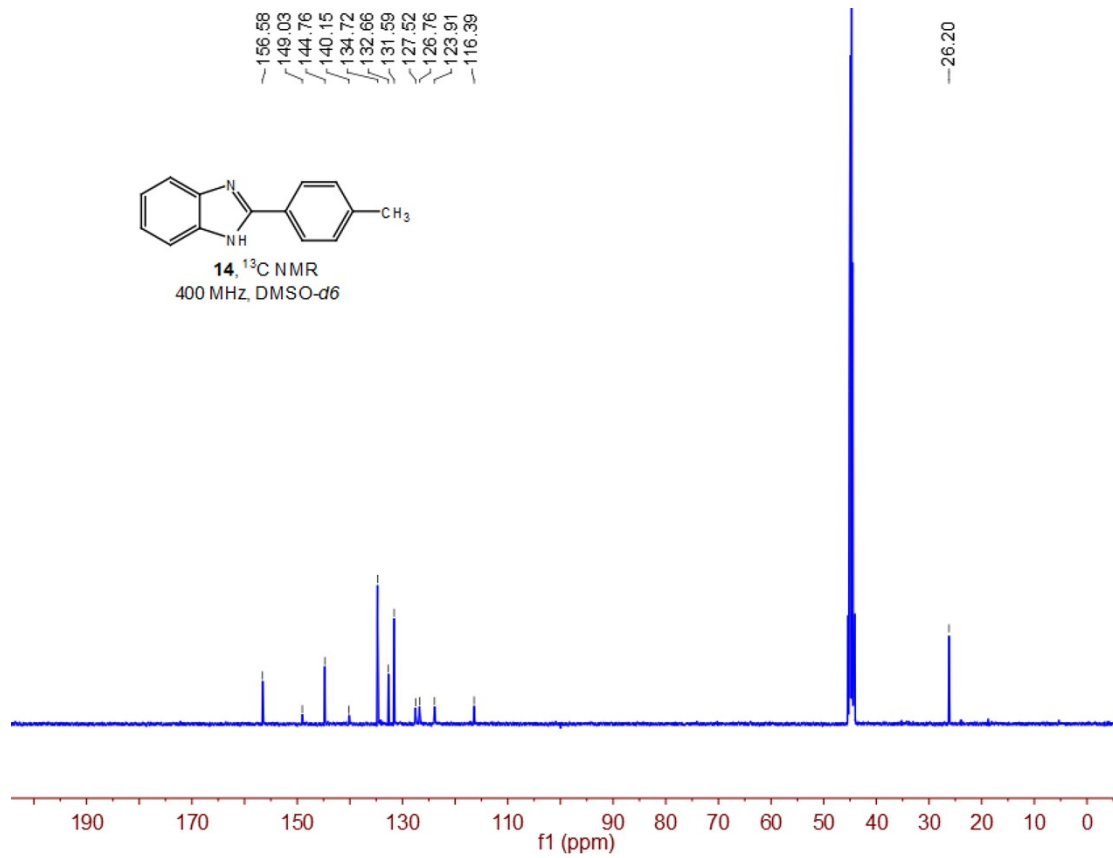

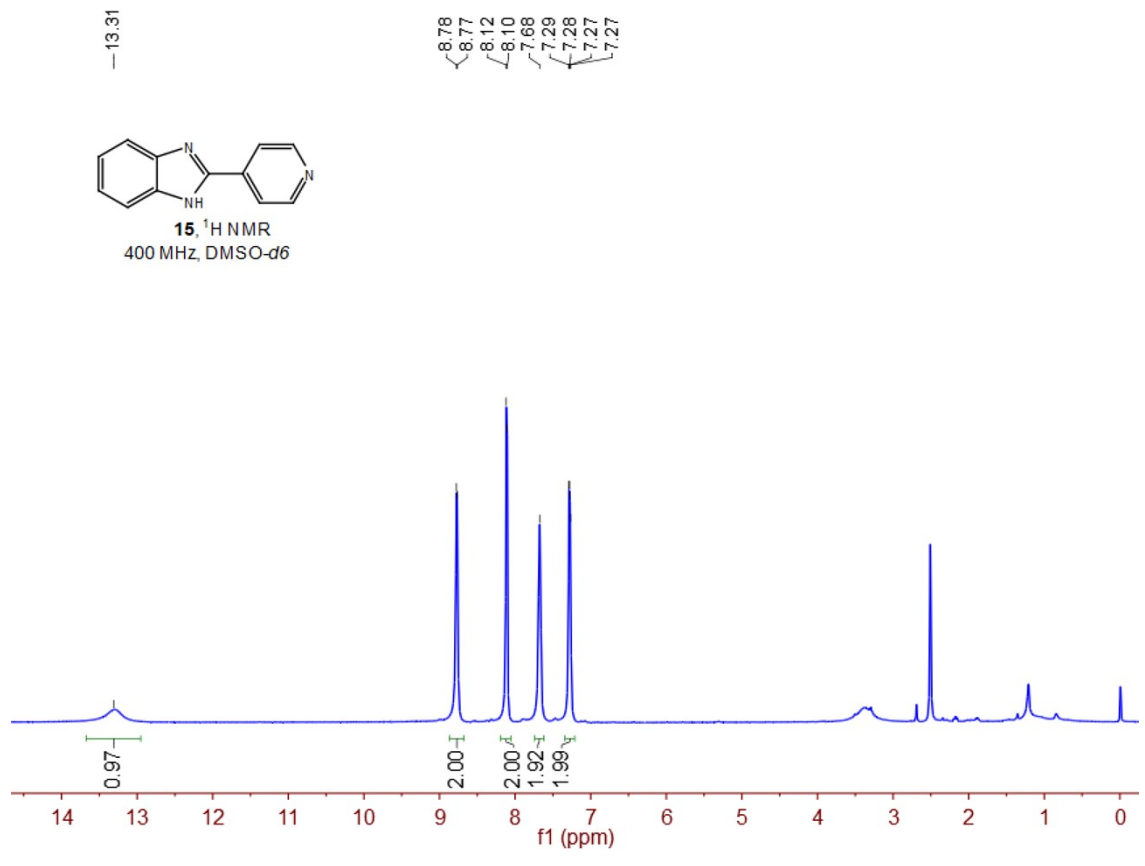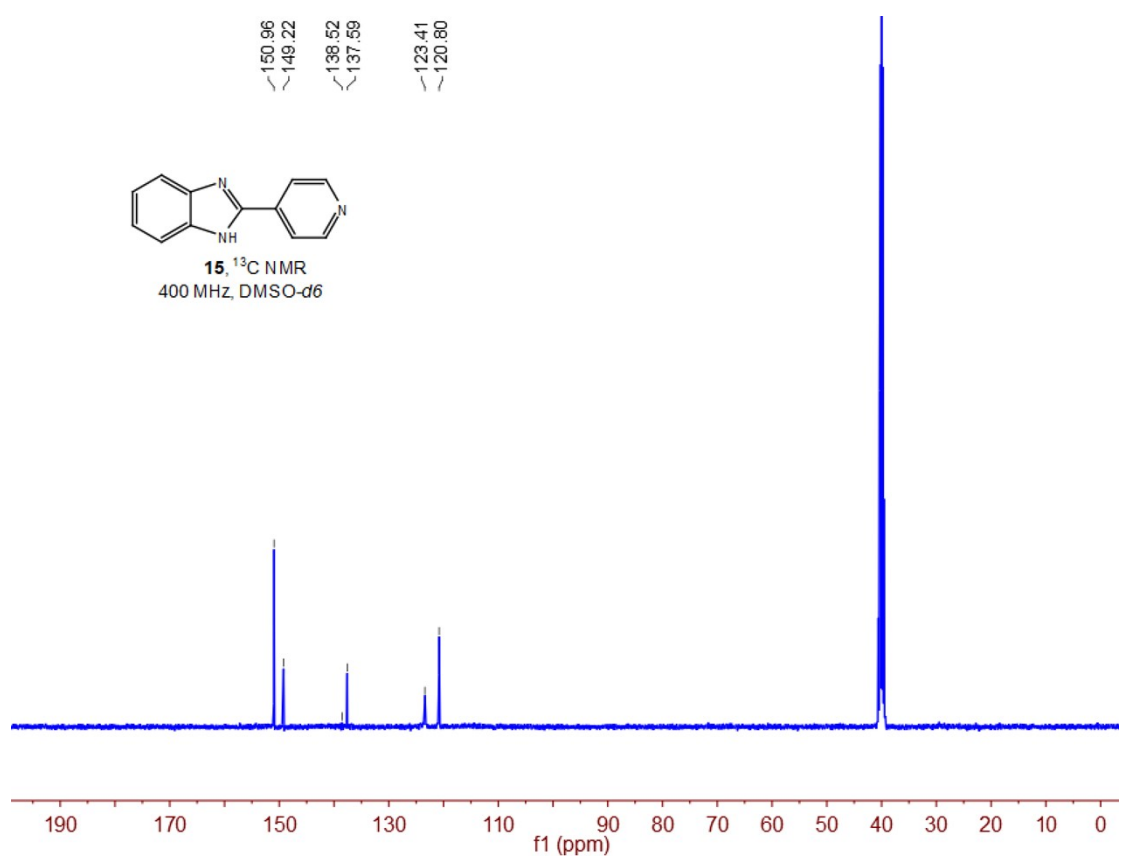

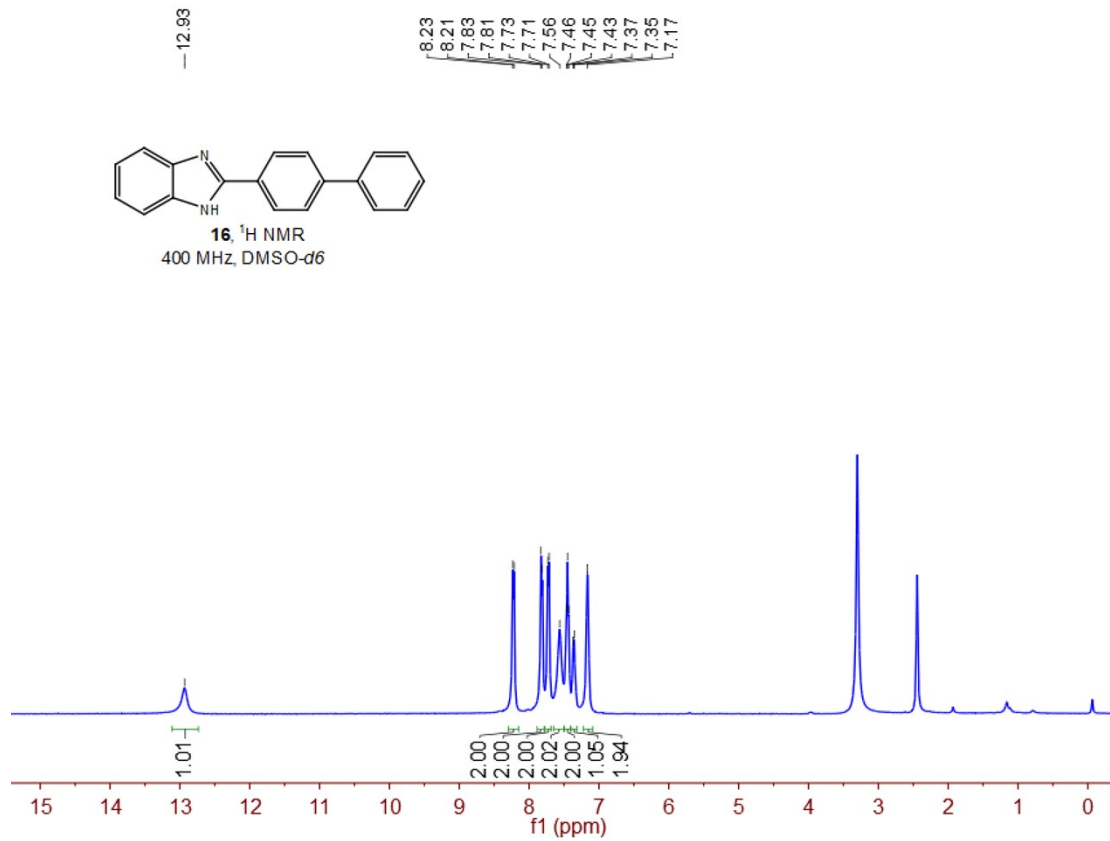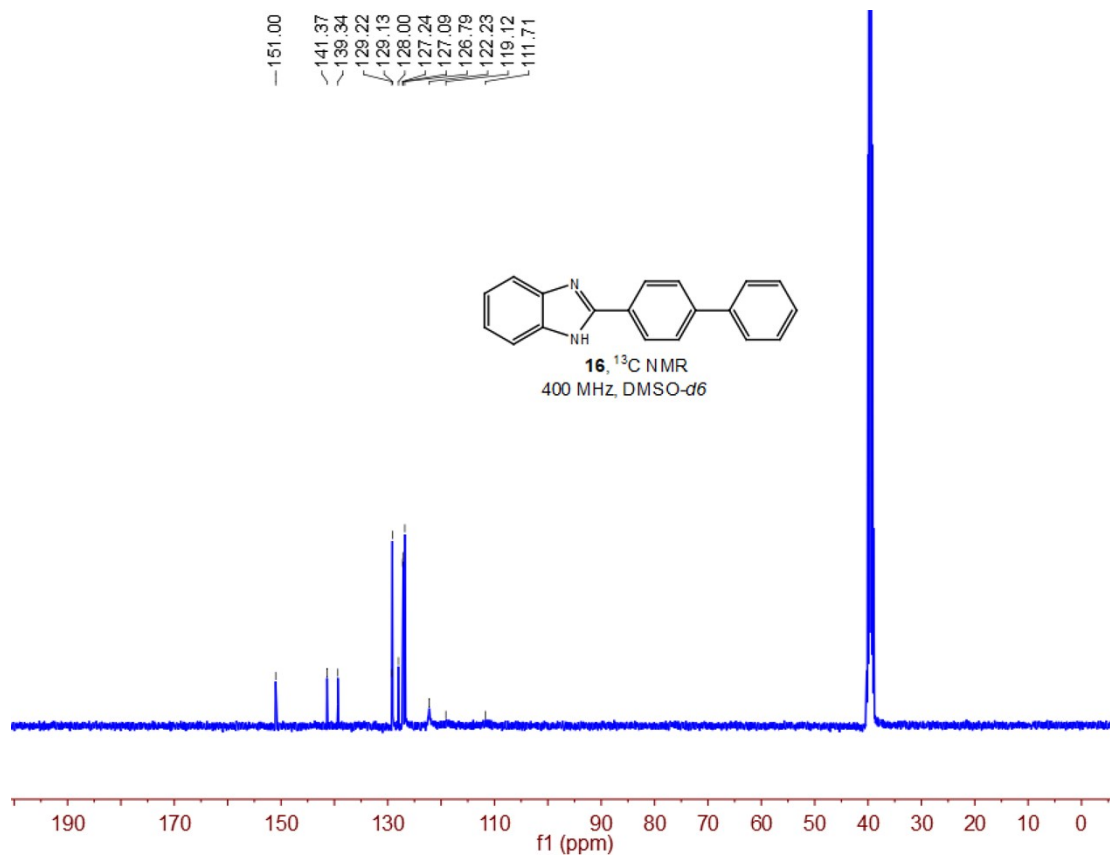

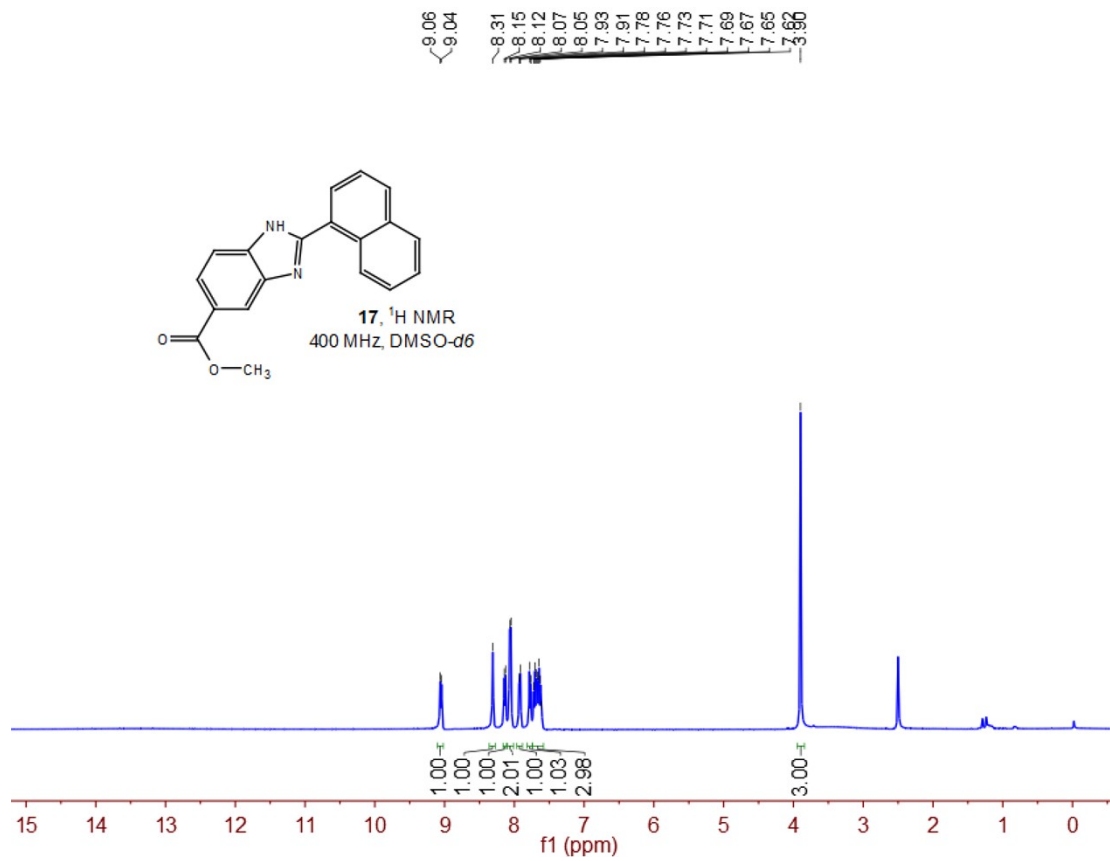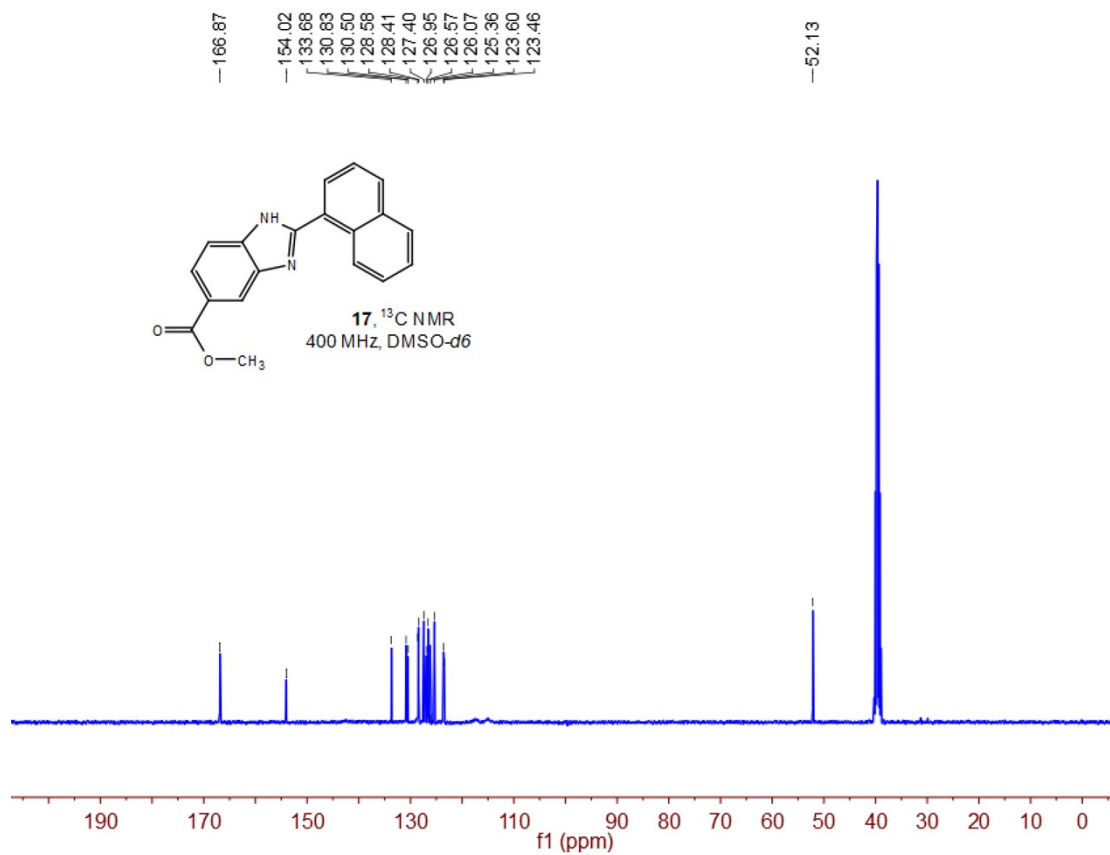

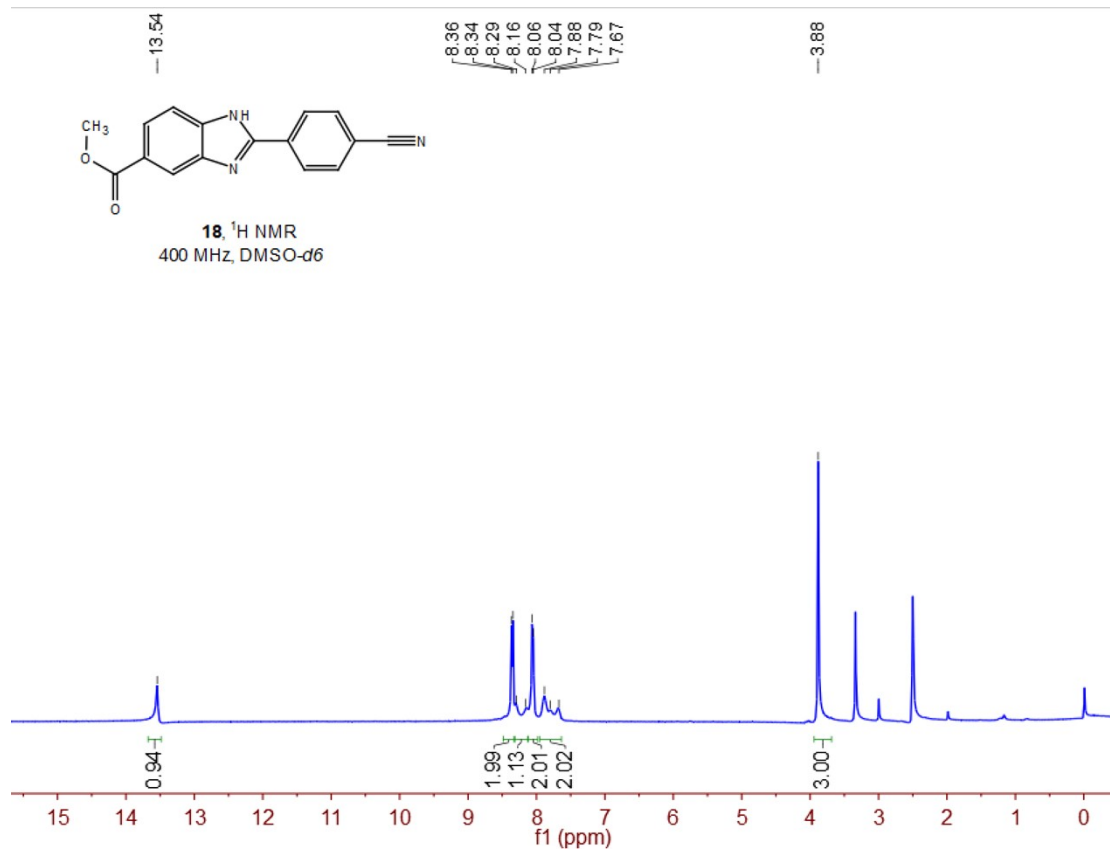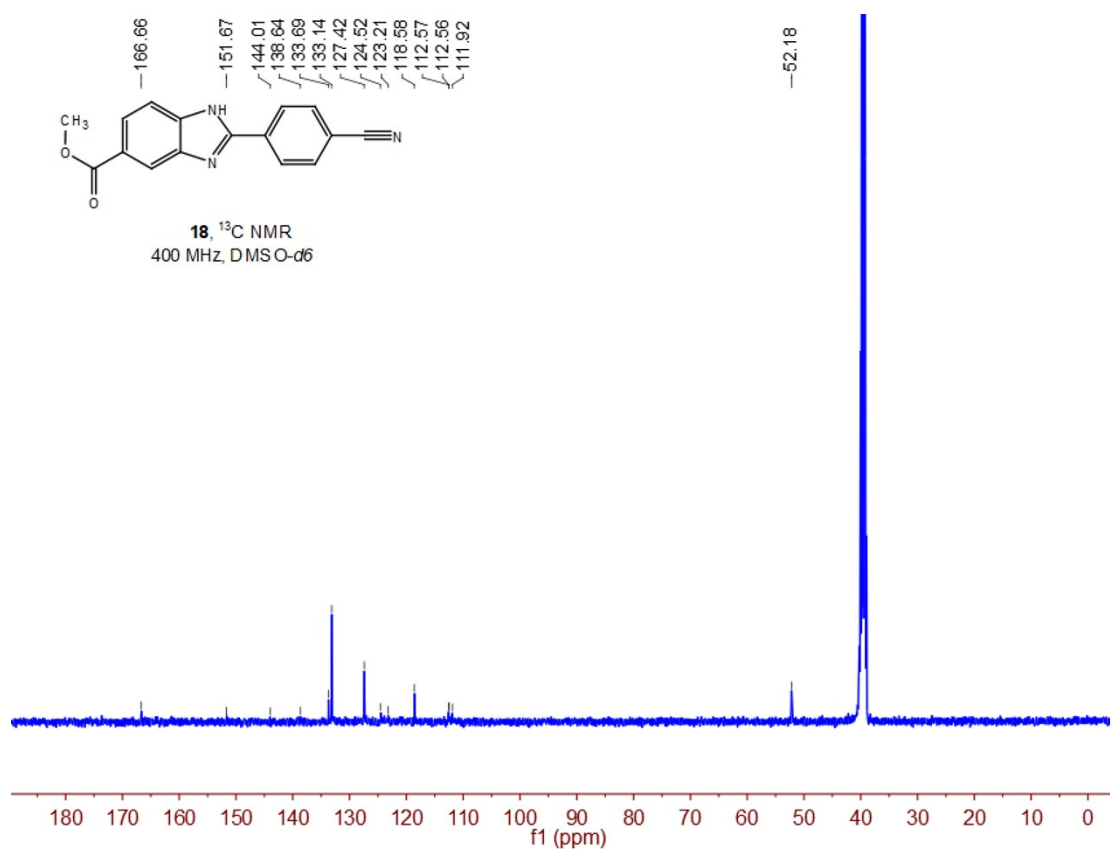

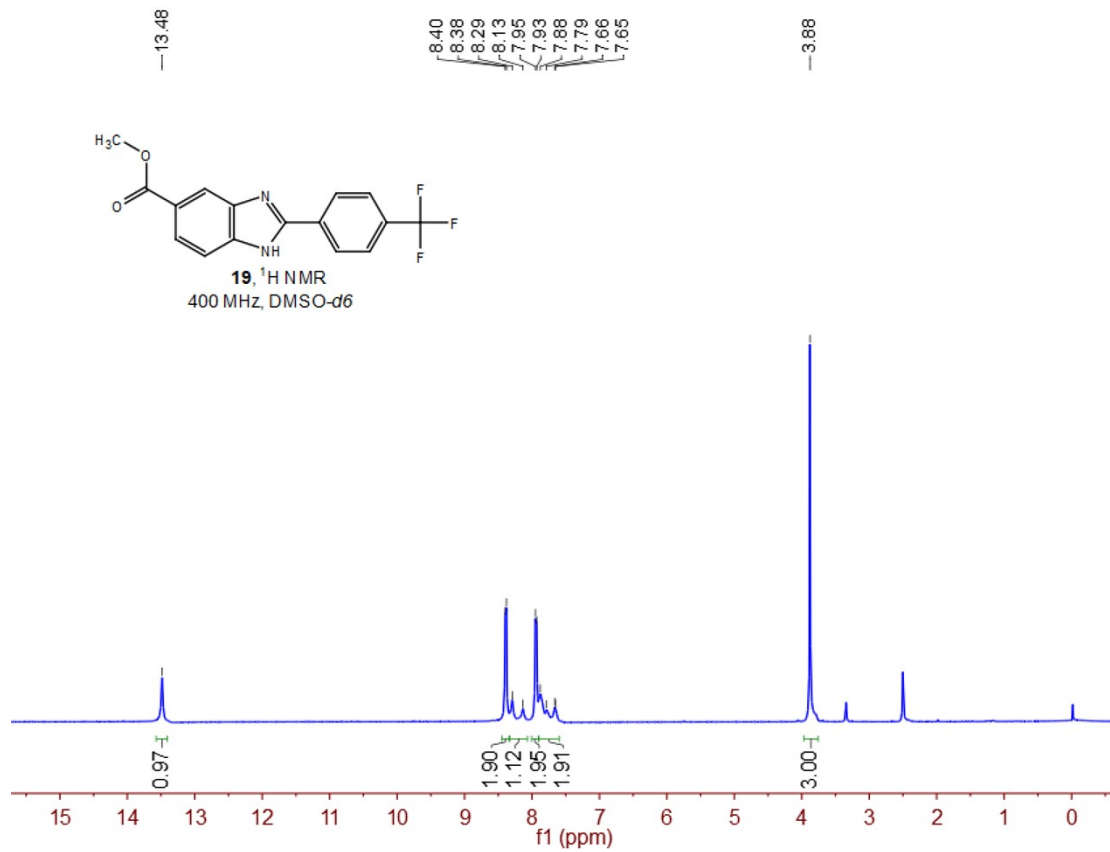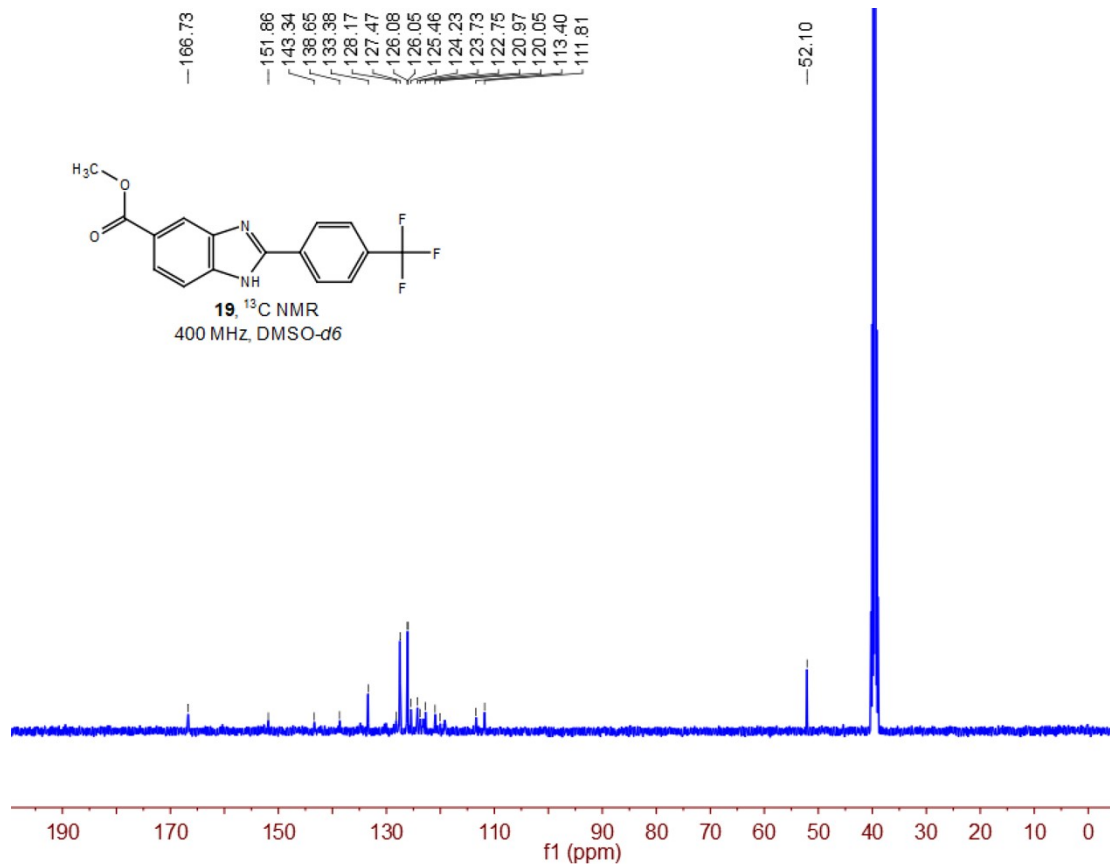

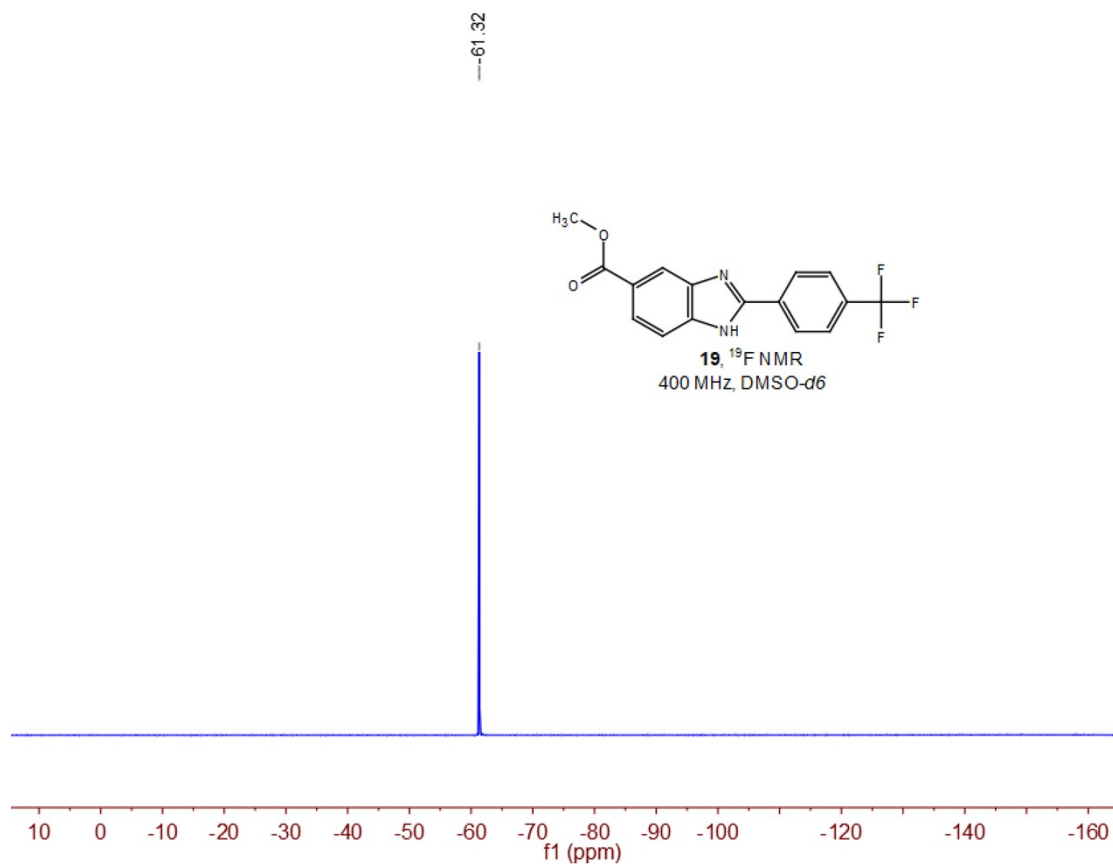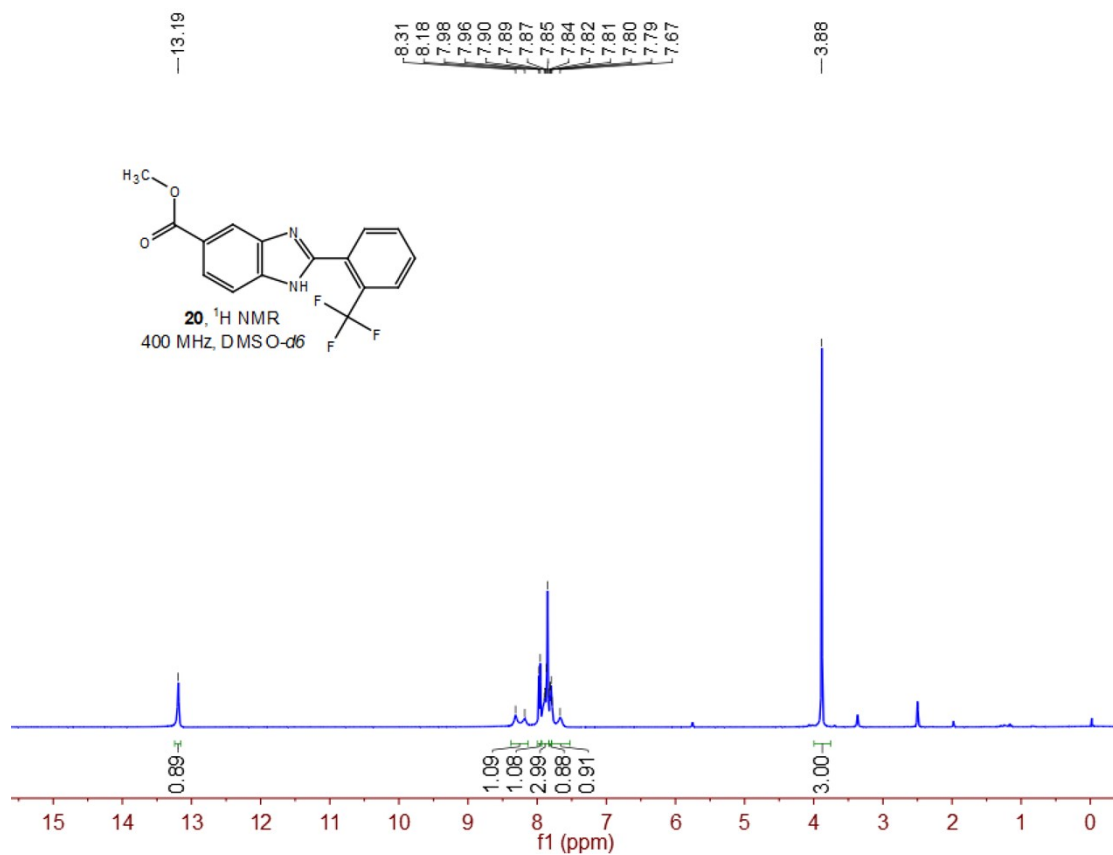

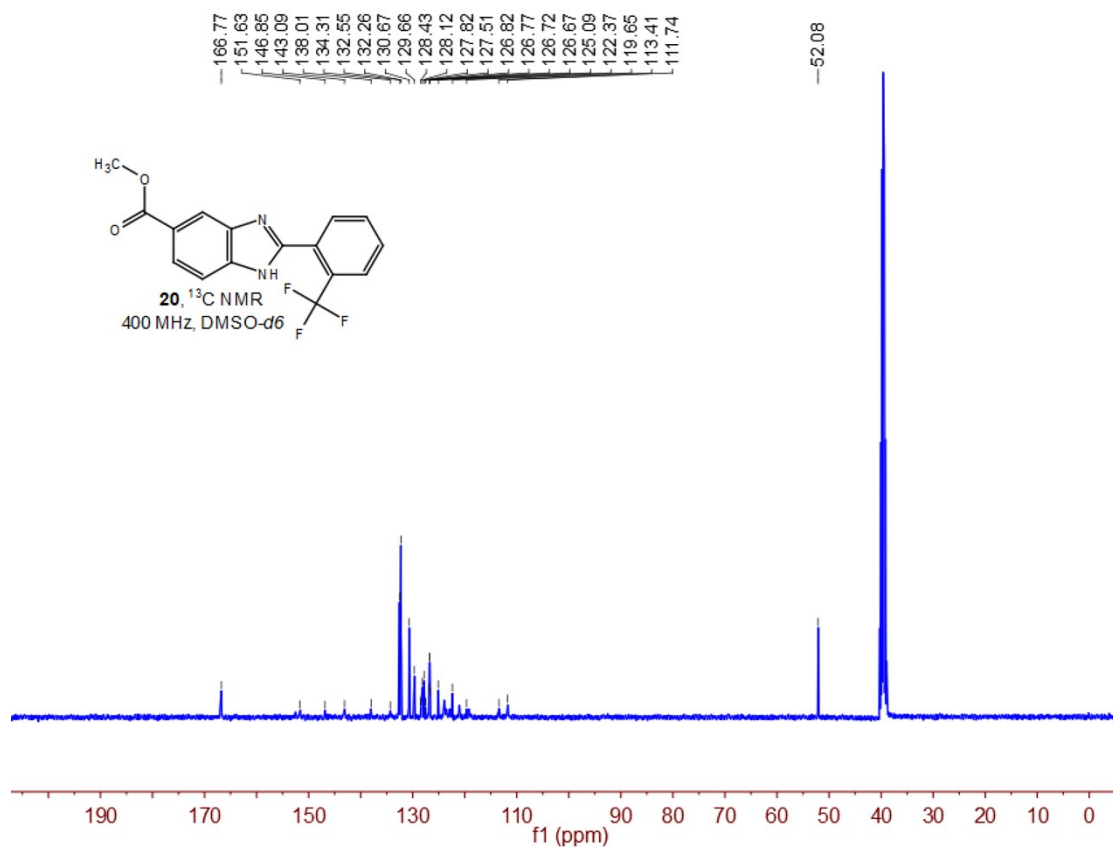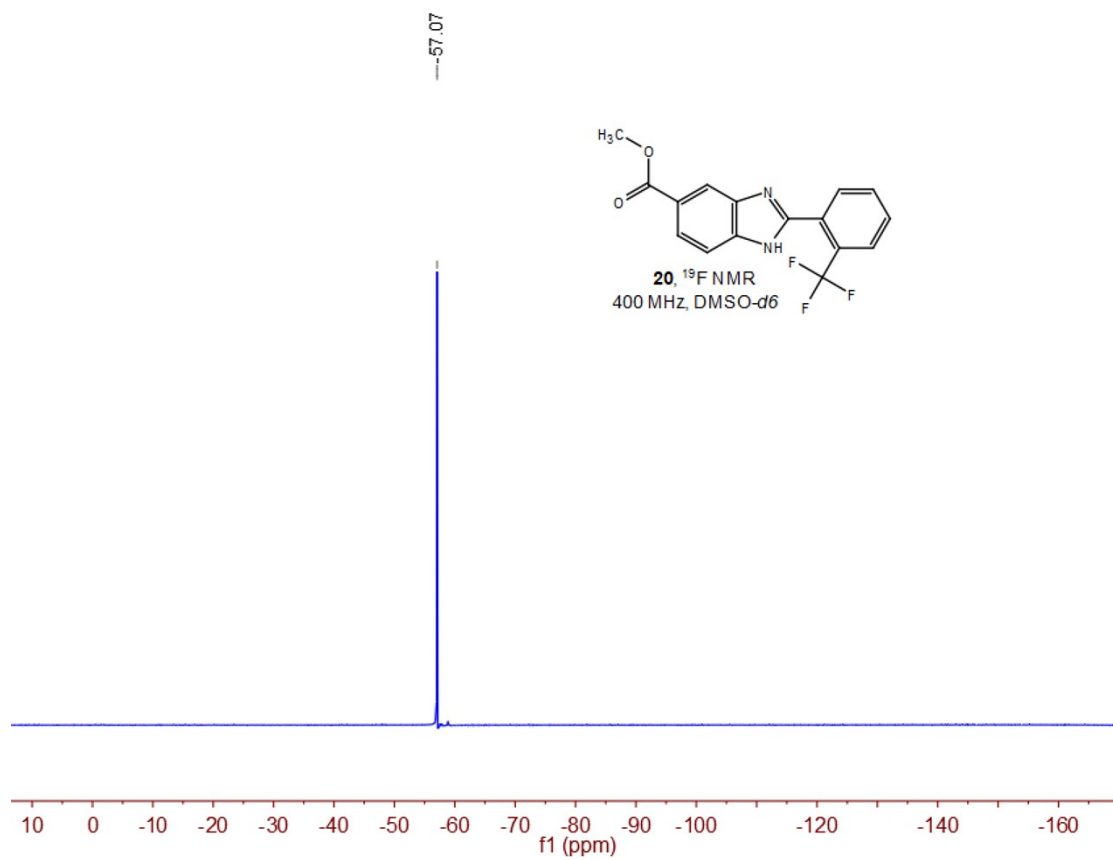



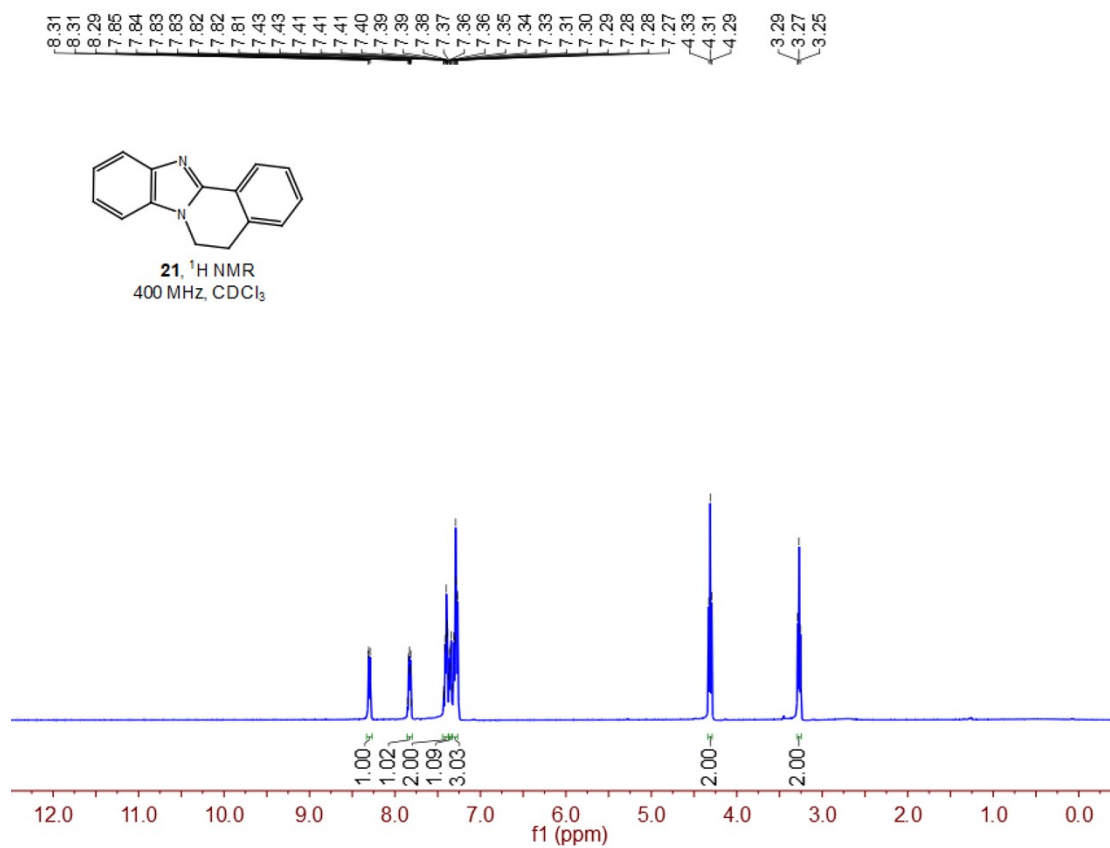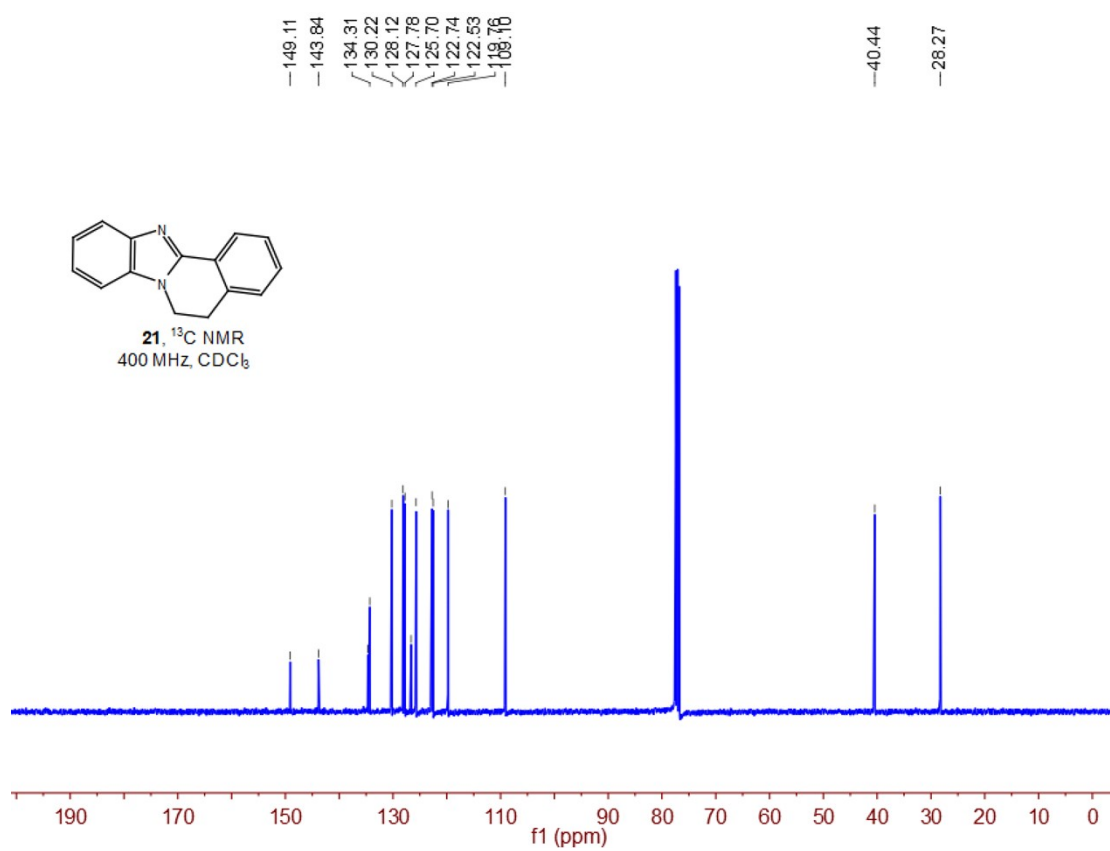

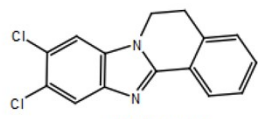

**22**,  $^1\text{H NMR}$   
400 MHz,  $\text{CDCl}_3$

8.23  
8.21  
8.21  
7.84  
7.42  
7.41  
7.40  
7.32  
7.31  
7.30

4.28  
4.26  
4.25  
3.30  
3.28  
3.27

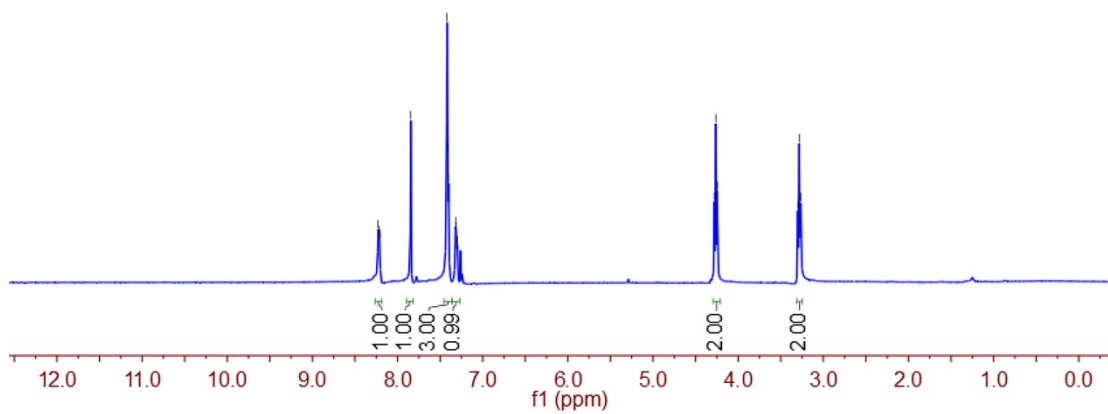

150.98  
143.21  
134.25  
130.91  
128.24  
127.96  
125.93  
125.90  
120.52

40.75  
28.07

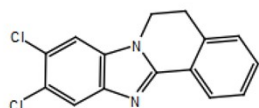

**22**,  $^{13}\text{C NMR}$   
400 MHz,  $\text{CDCl}_3$

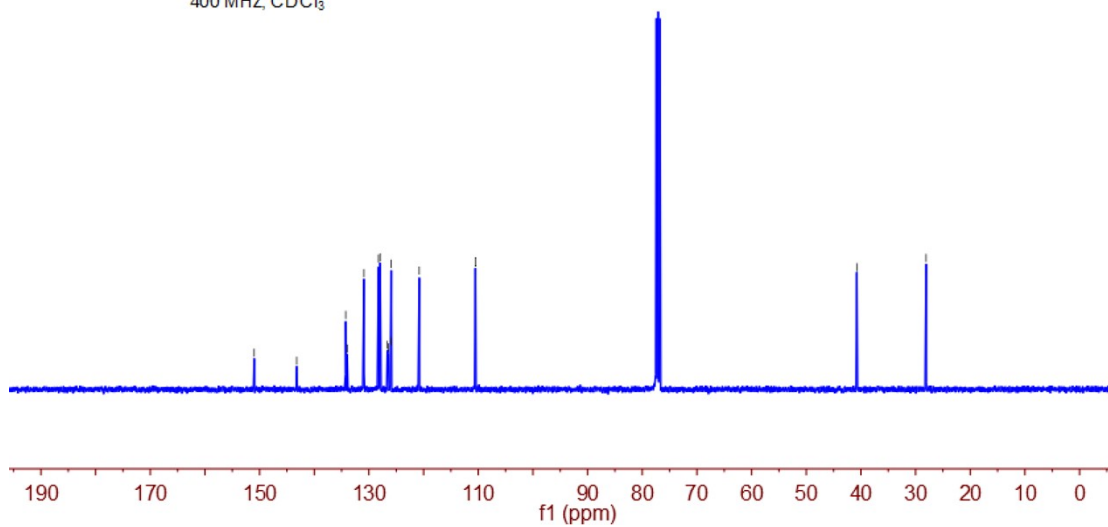

8.09  
8.07  
7.86  
7.85  
7.84  
7.83  
7.58  
7.56  
7.54  
7.52  
7.50  
7.48  
7.47  
7.45  
7.44  
7.43  
7.42  
7.30  
7.29  
7.28  
7.27  
5.05

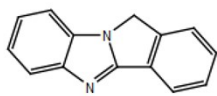

**23**,  $^1\text{H}$  NMR  
400 MHz,  $\text{CDCl}_3$

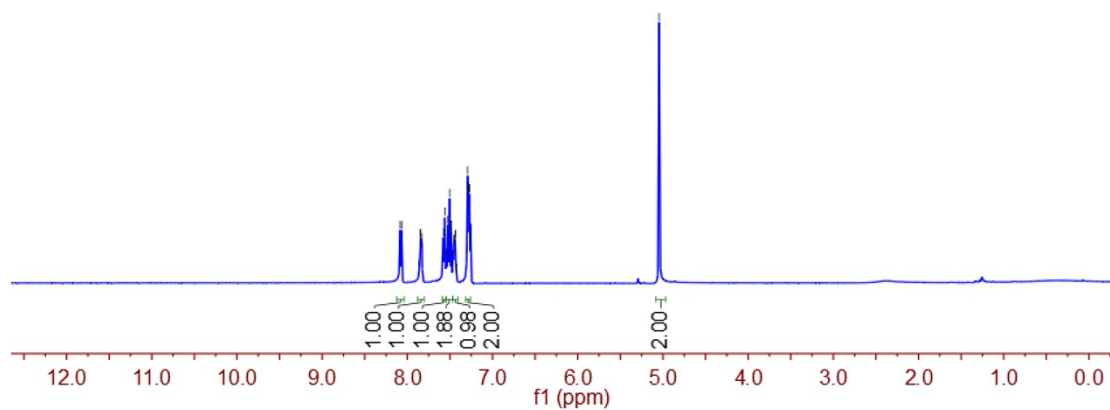

158.51  
148.22  
143.58  
129.67  
129.39  
128.89  
123.93  
122.84  
122.36  
122.27  
109.58  
47.39

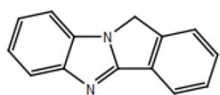

**23**,  $^{13}\text{C}$  NMR  
400 MHz,  $\text{CDCl}_3$

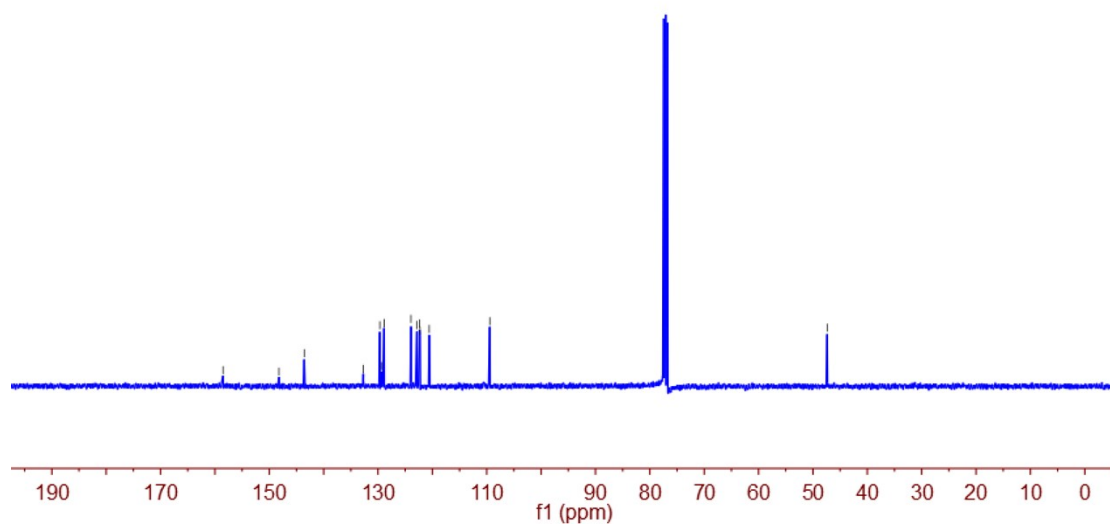

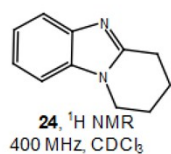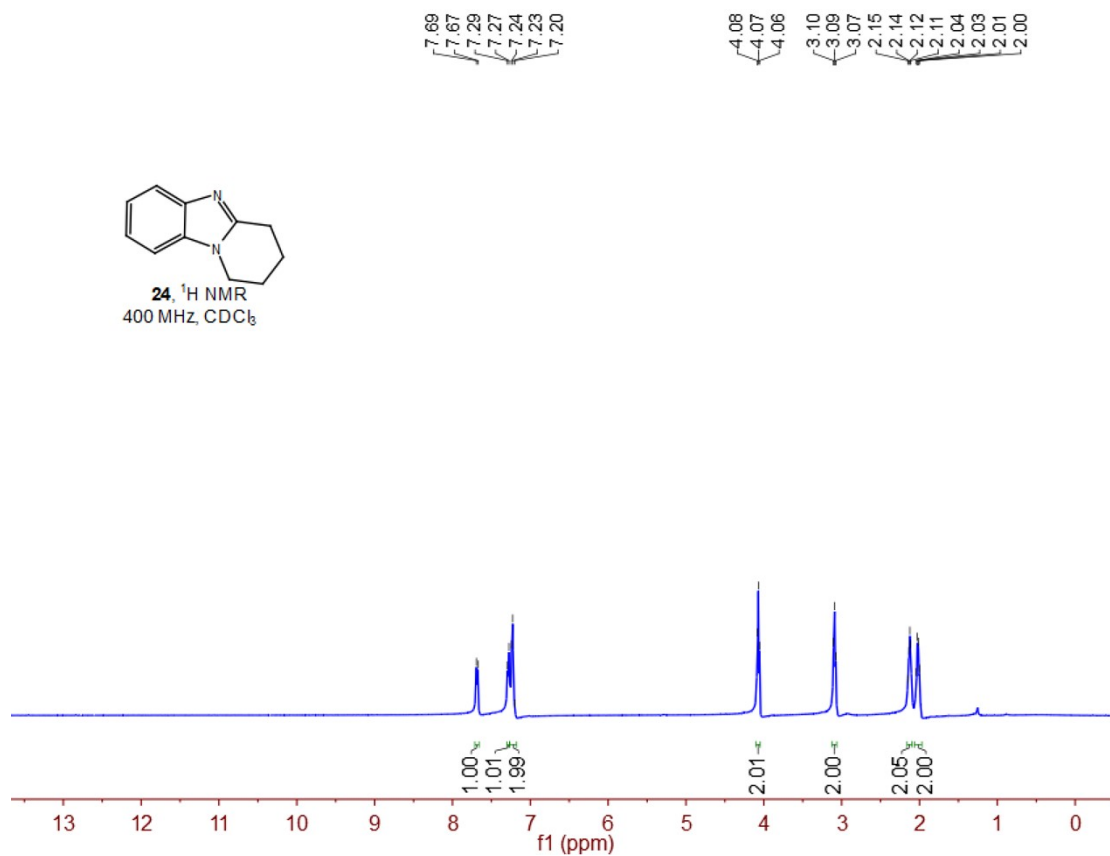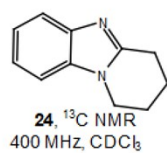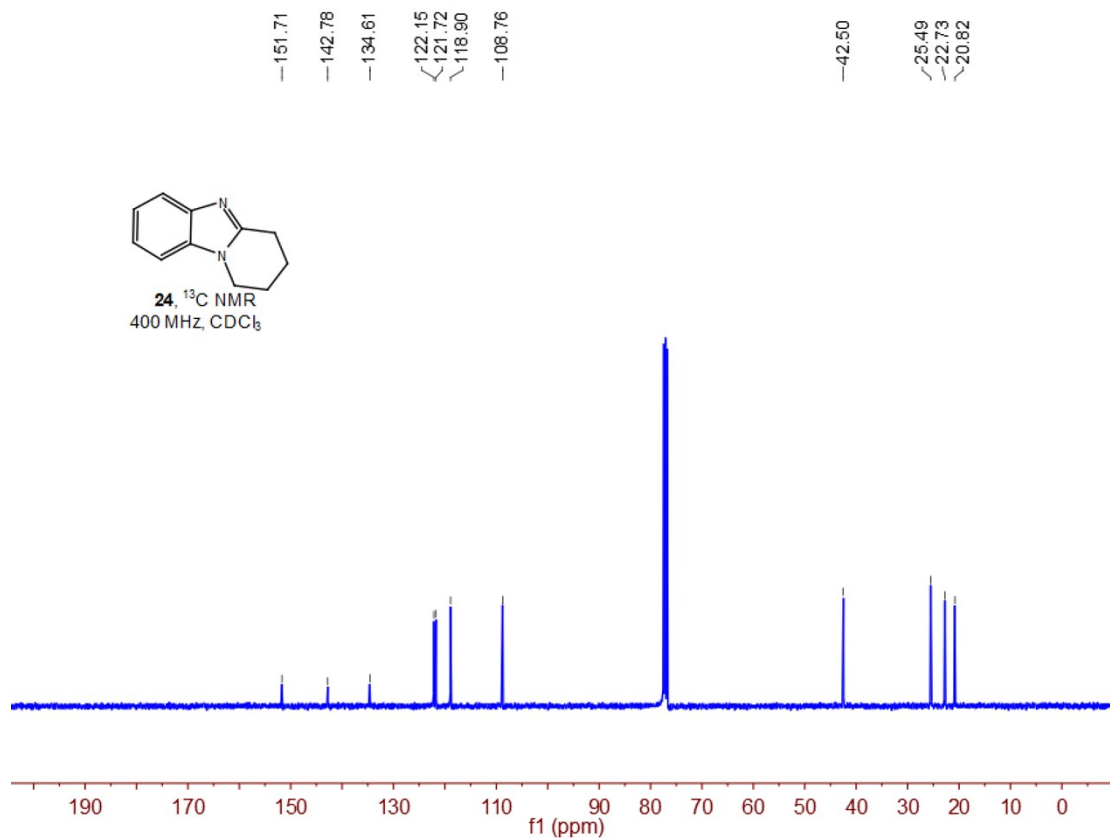

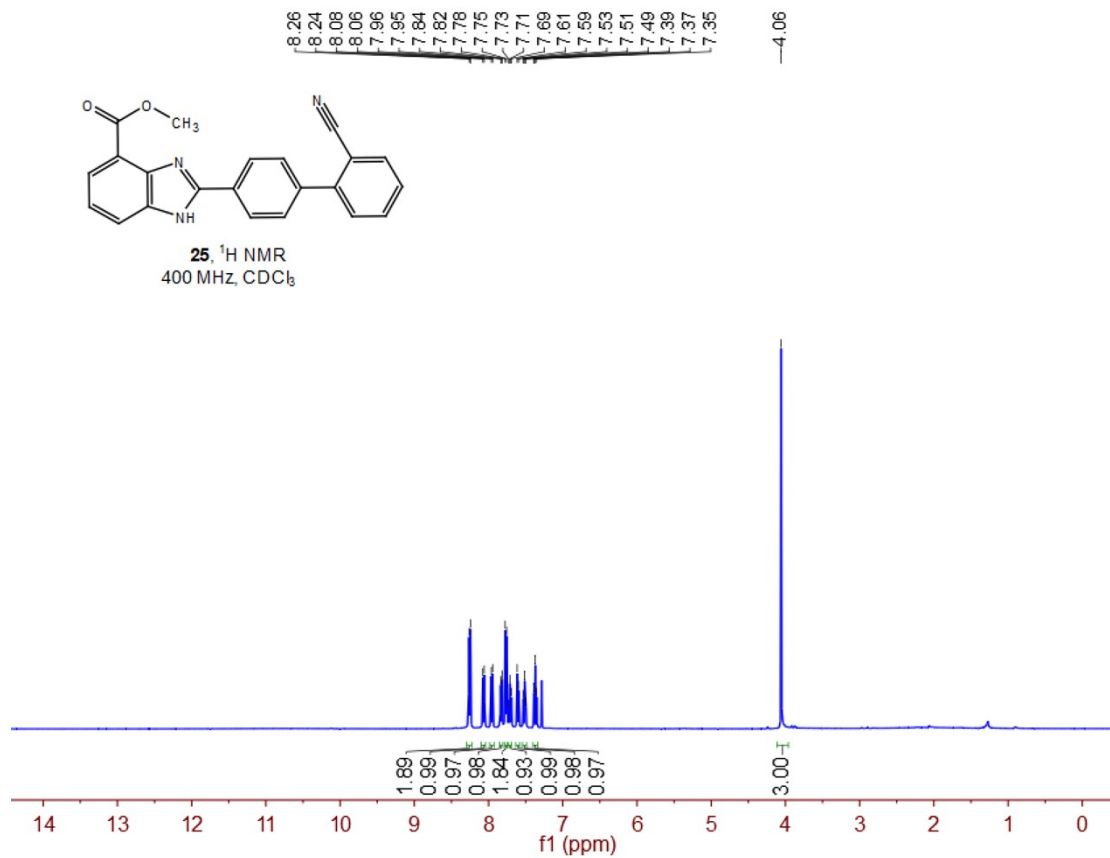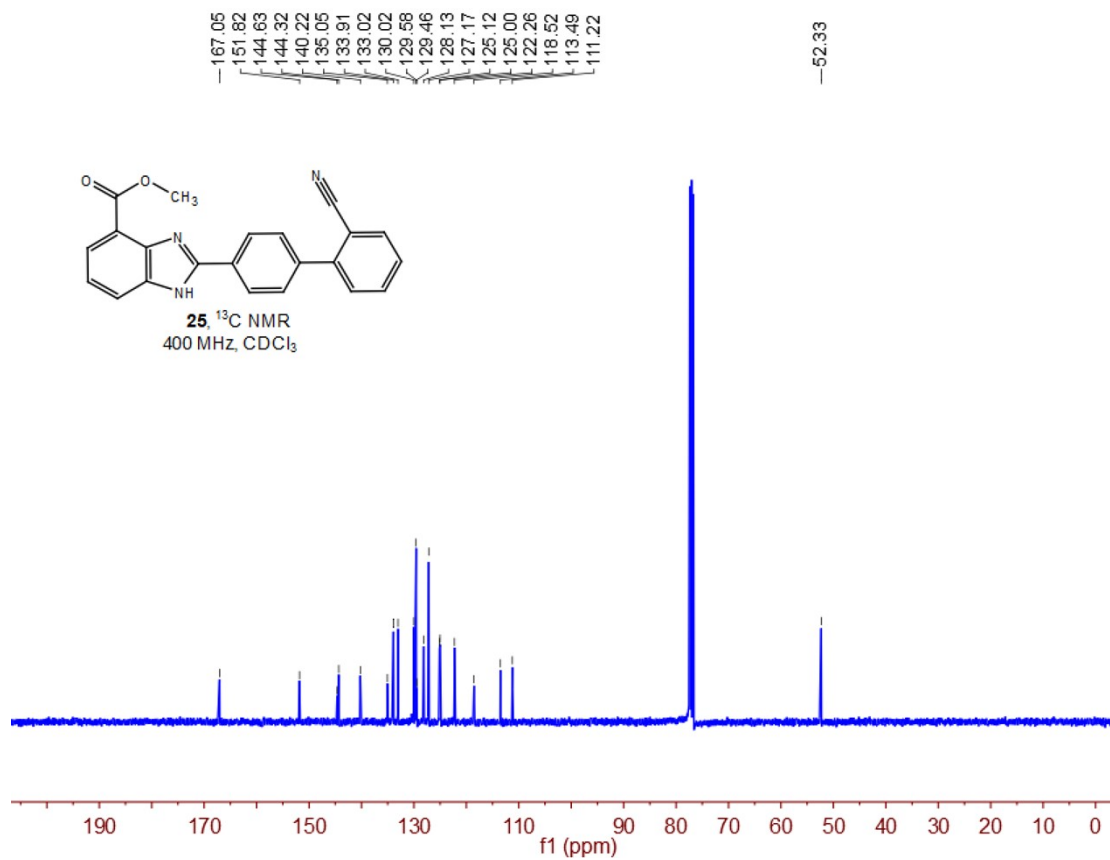

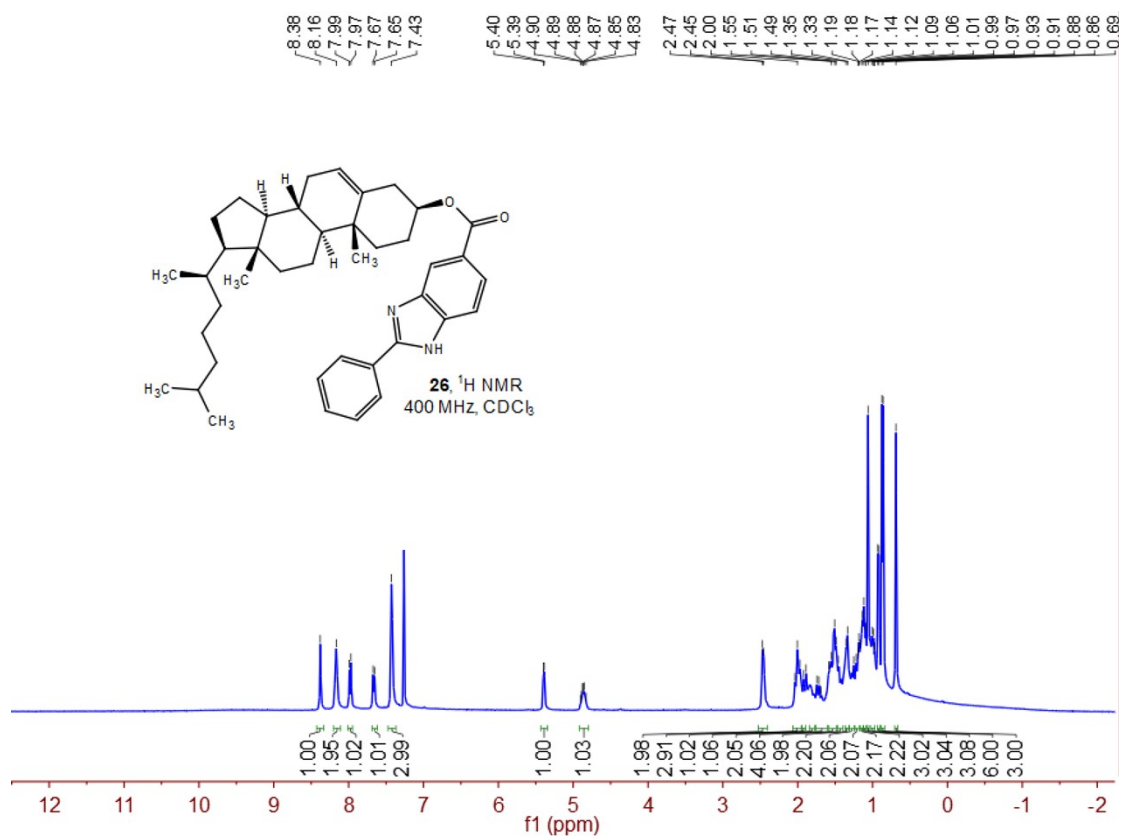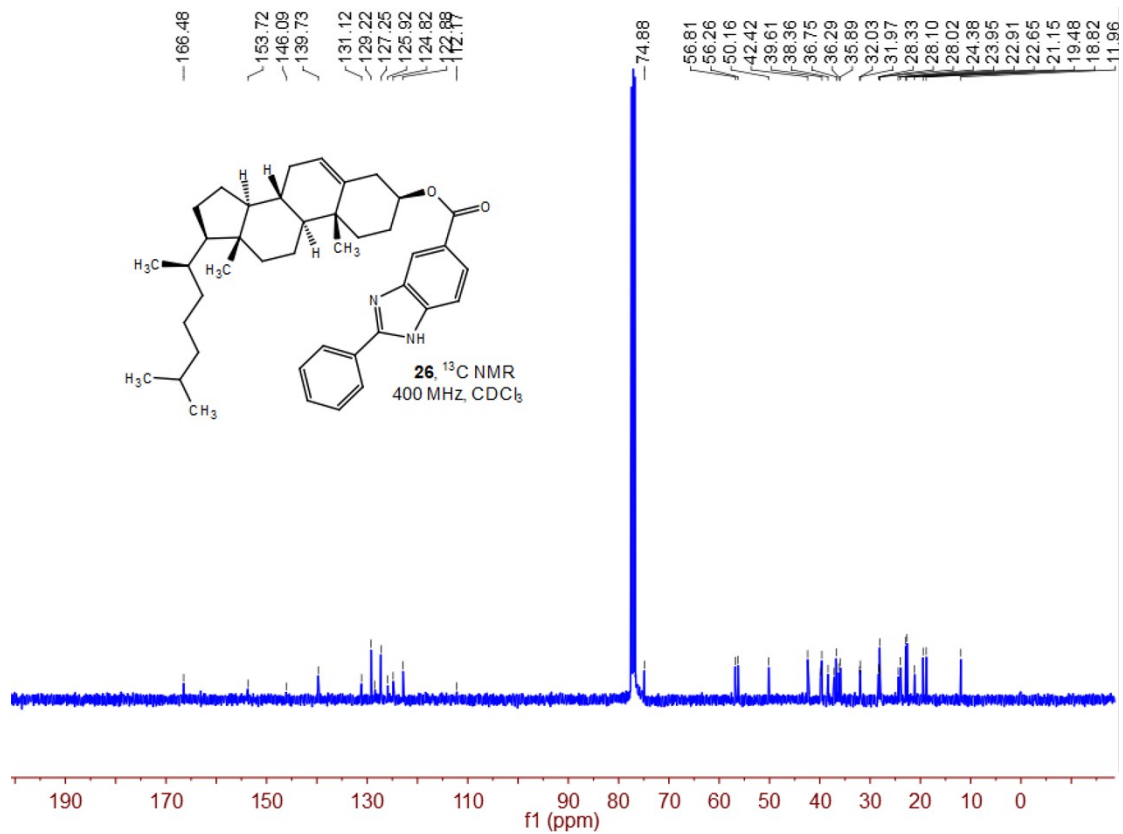

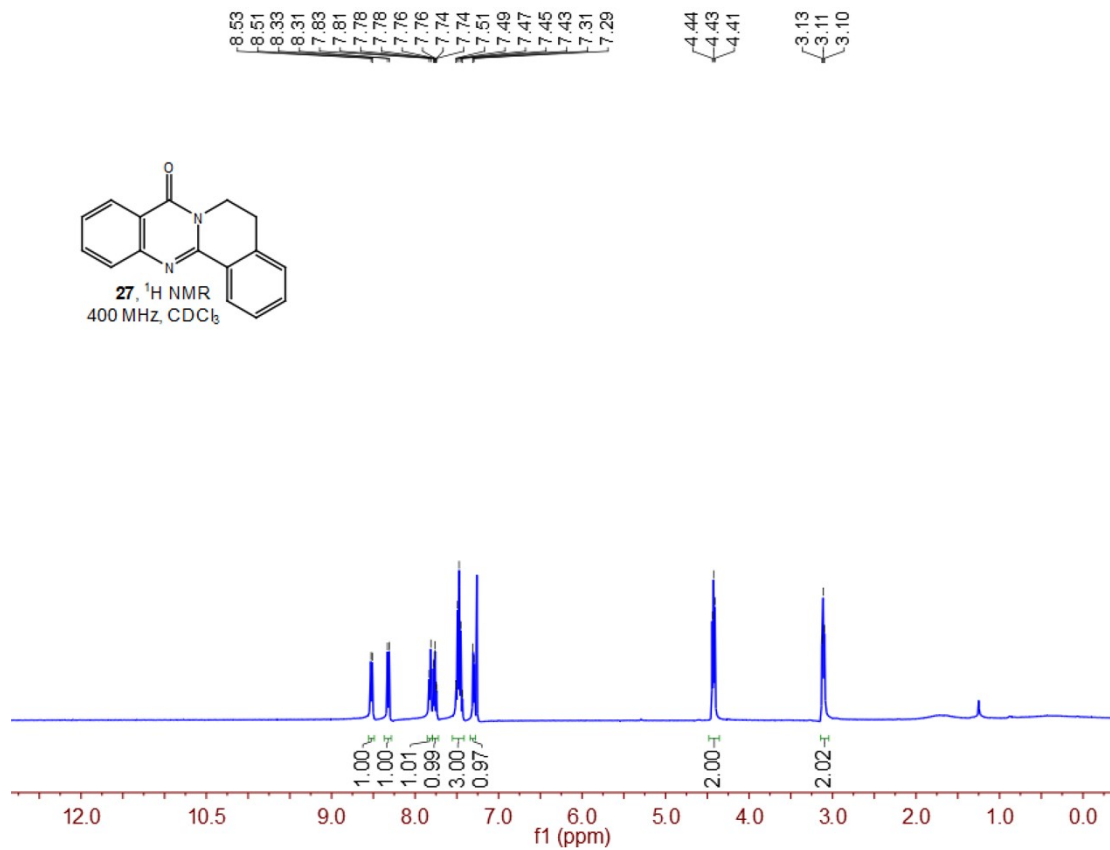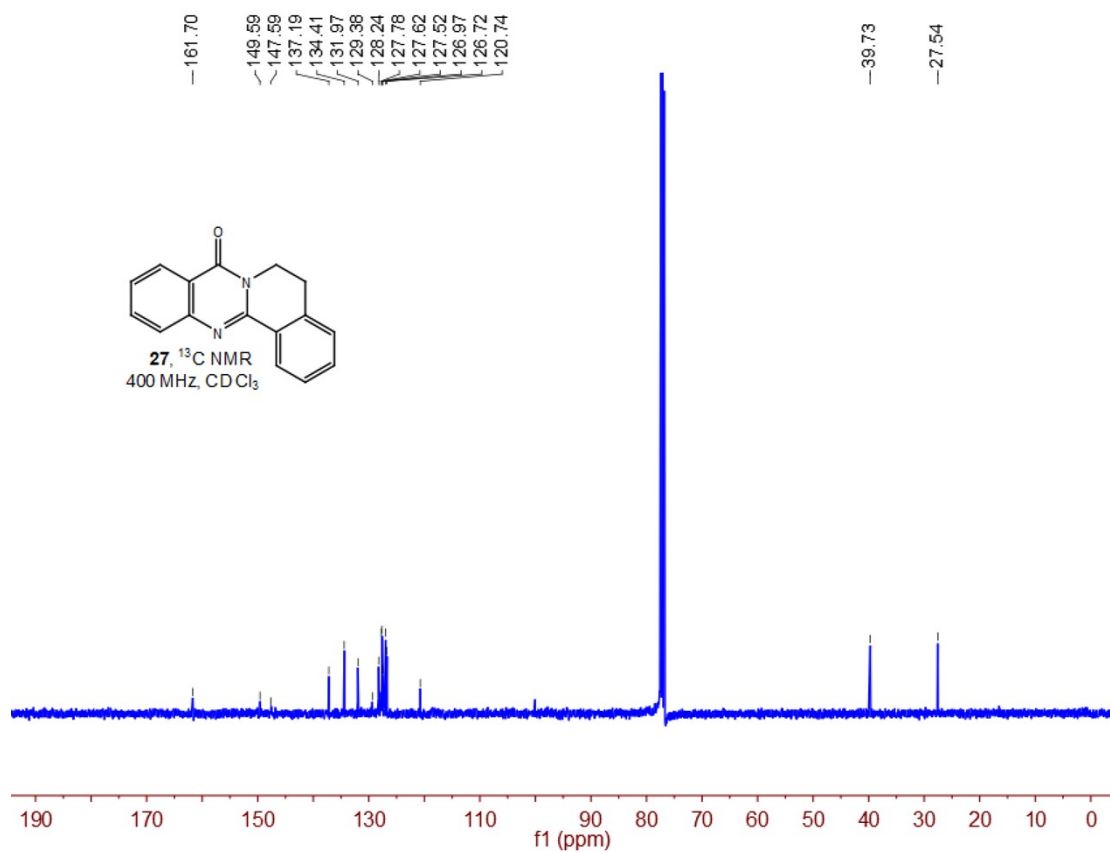

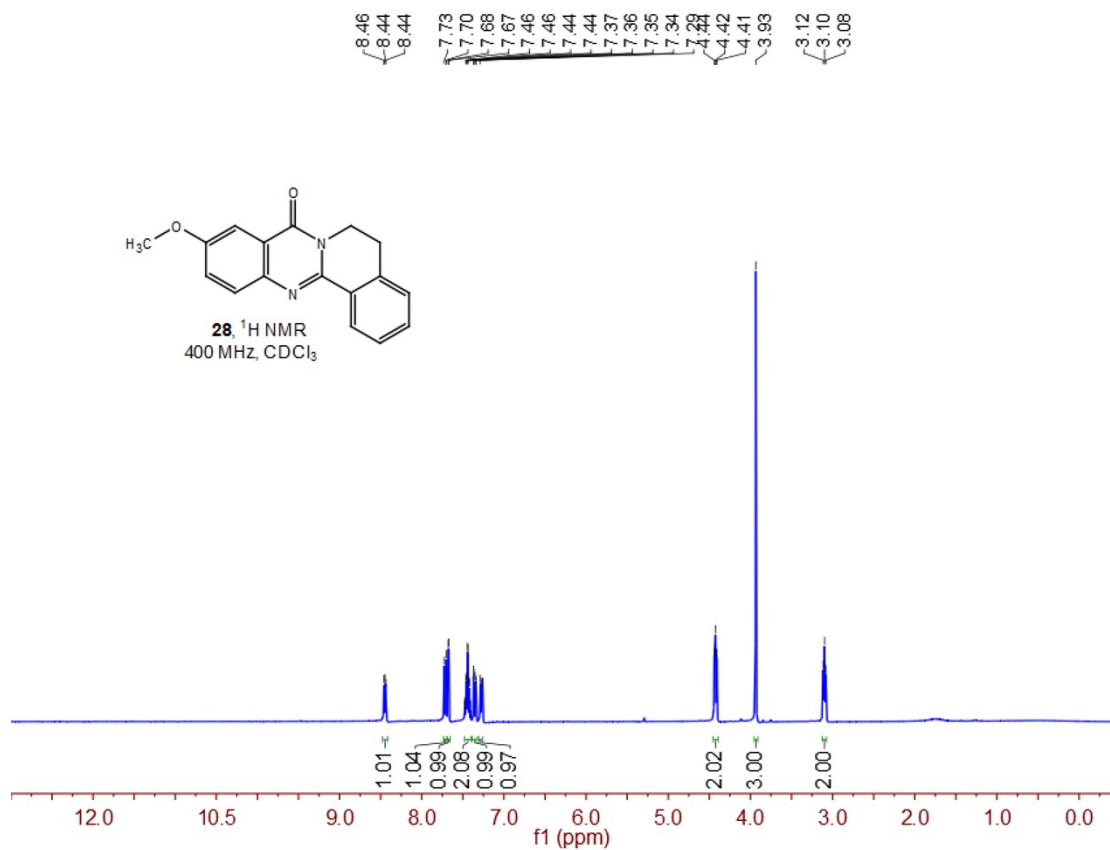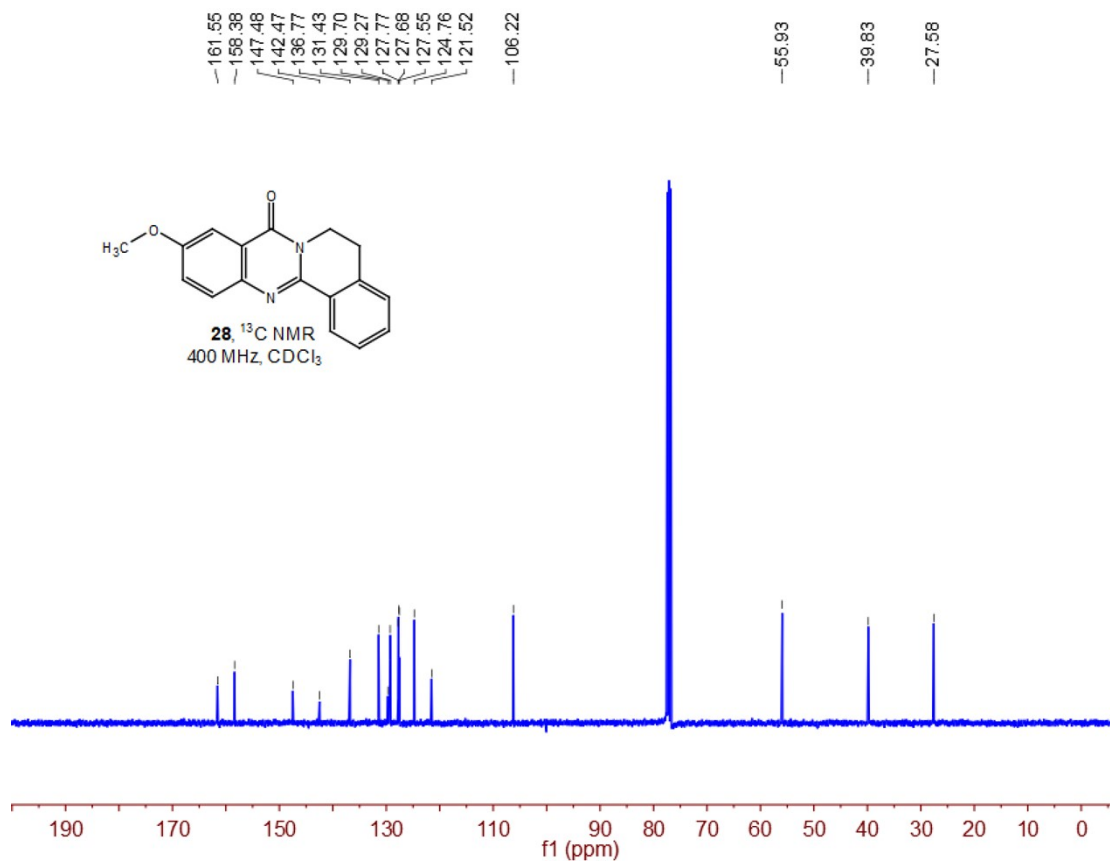



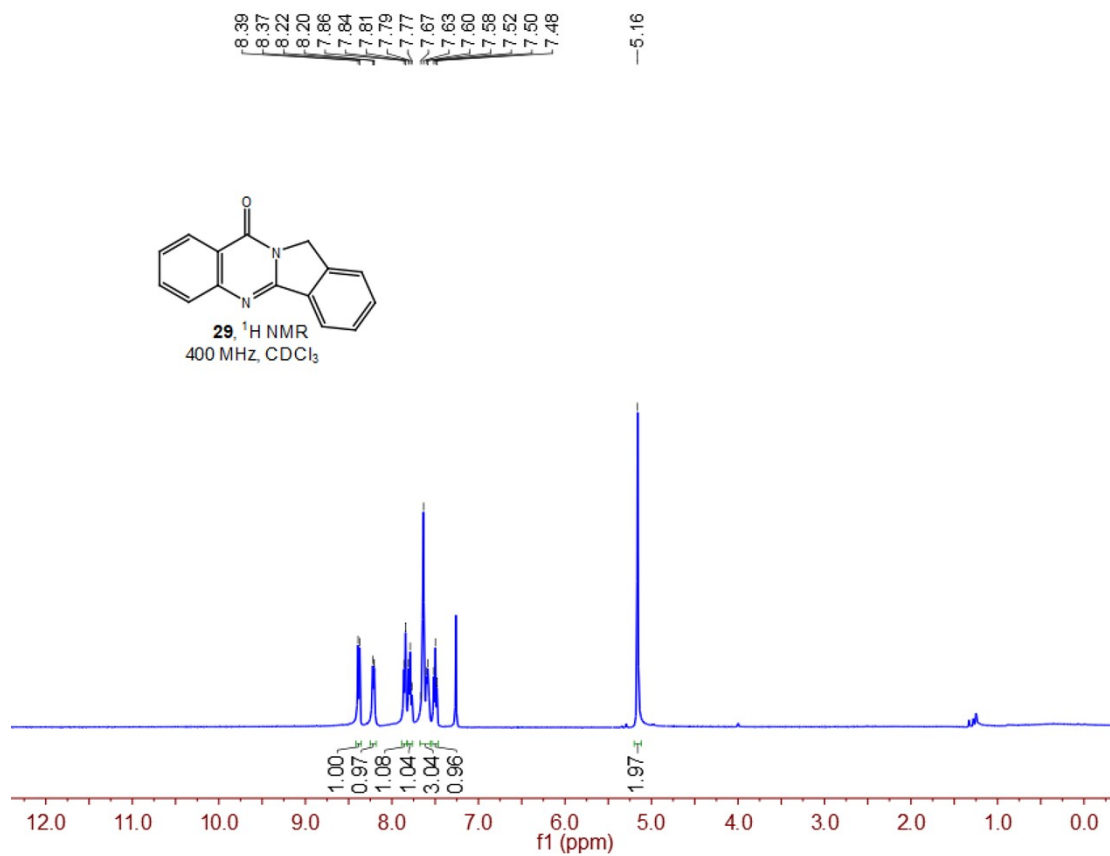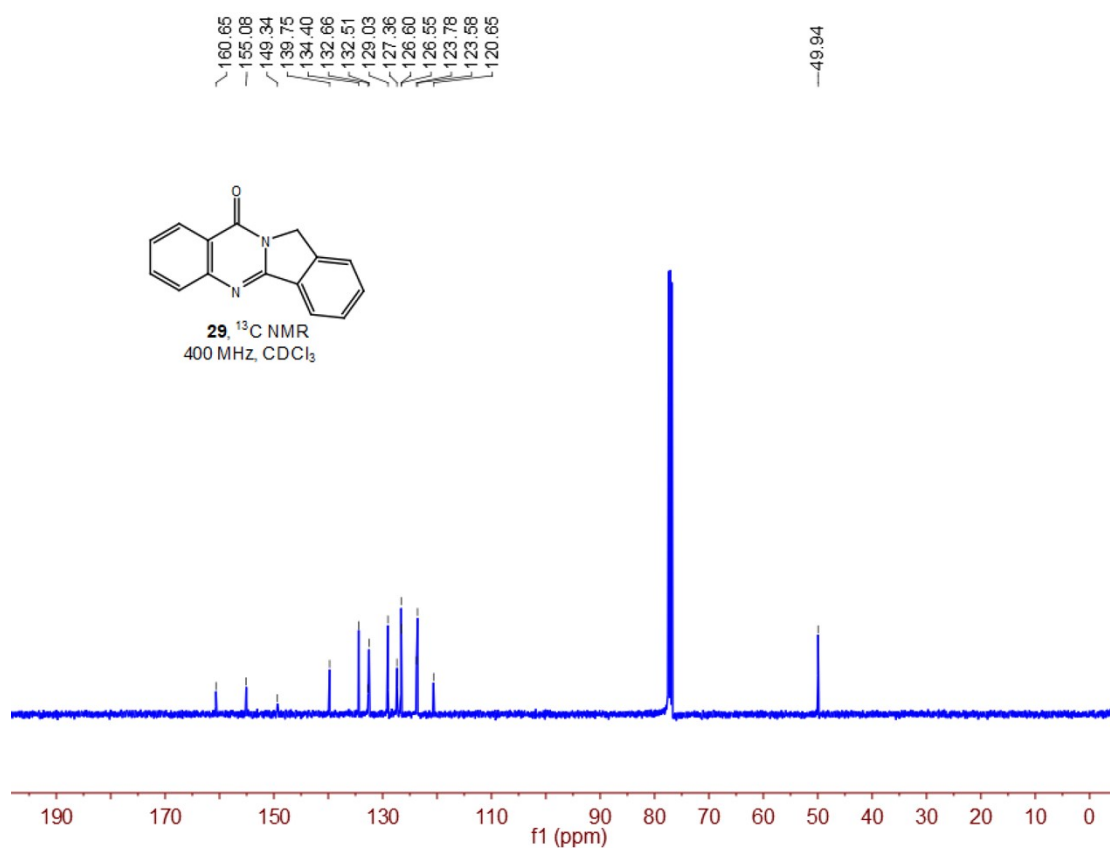

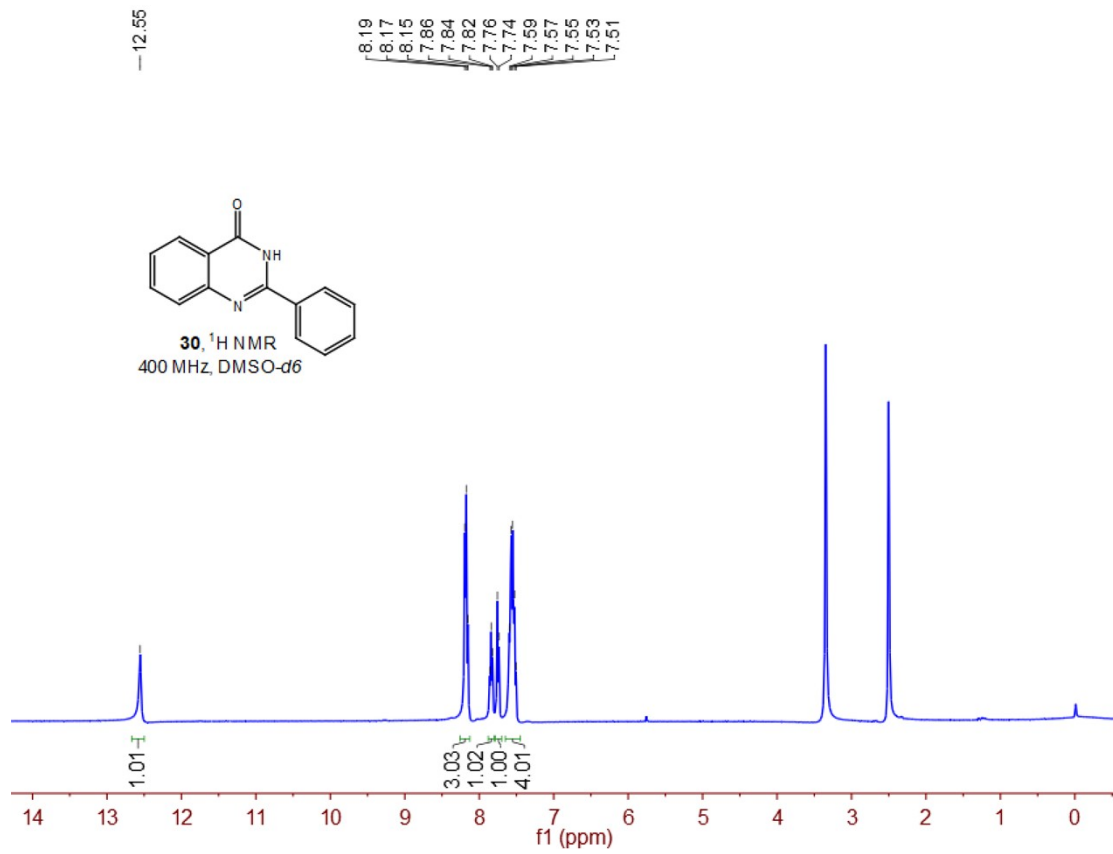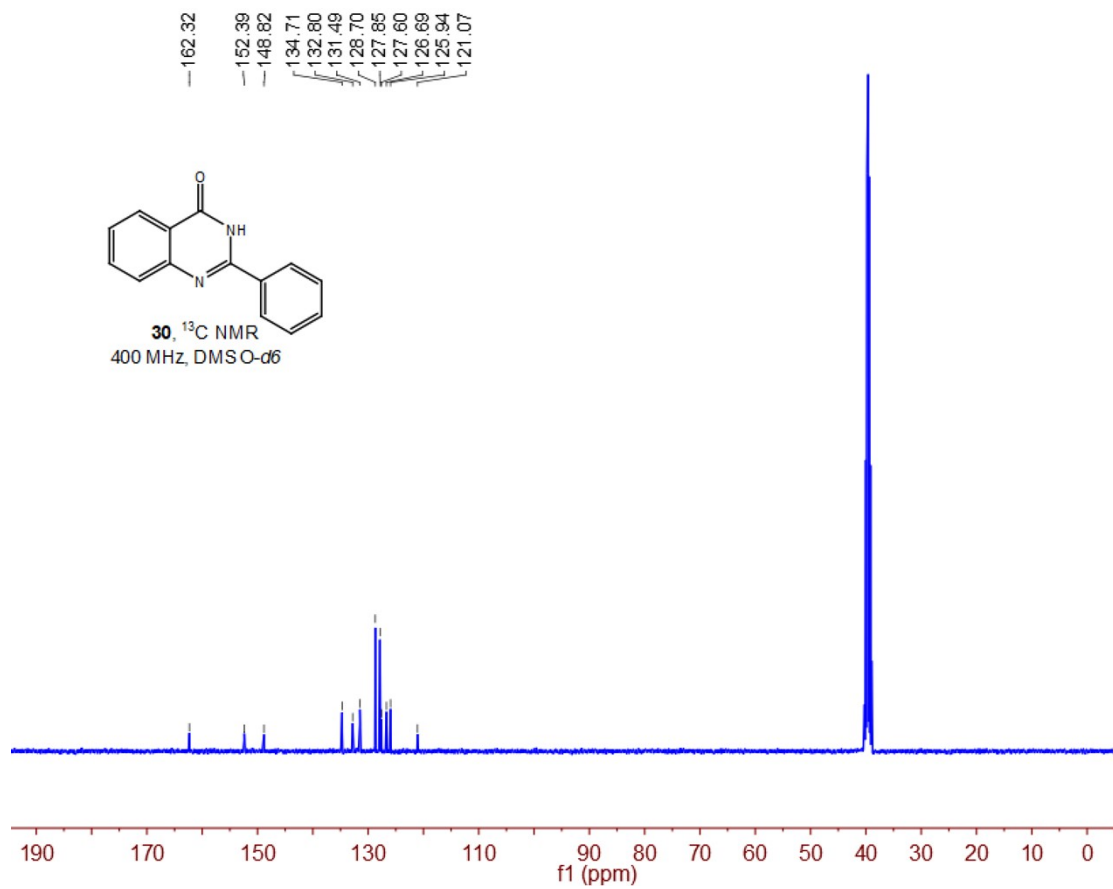

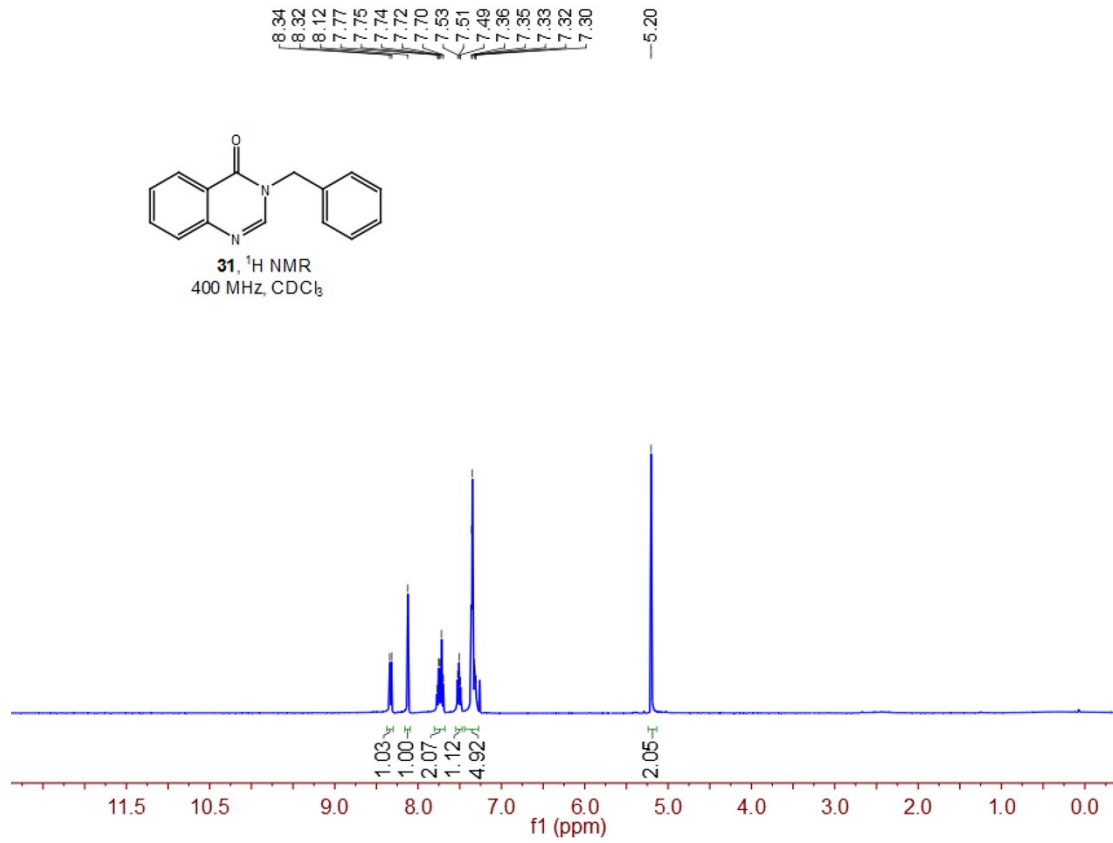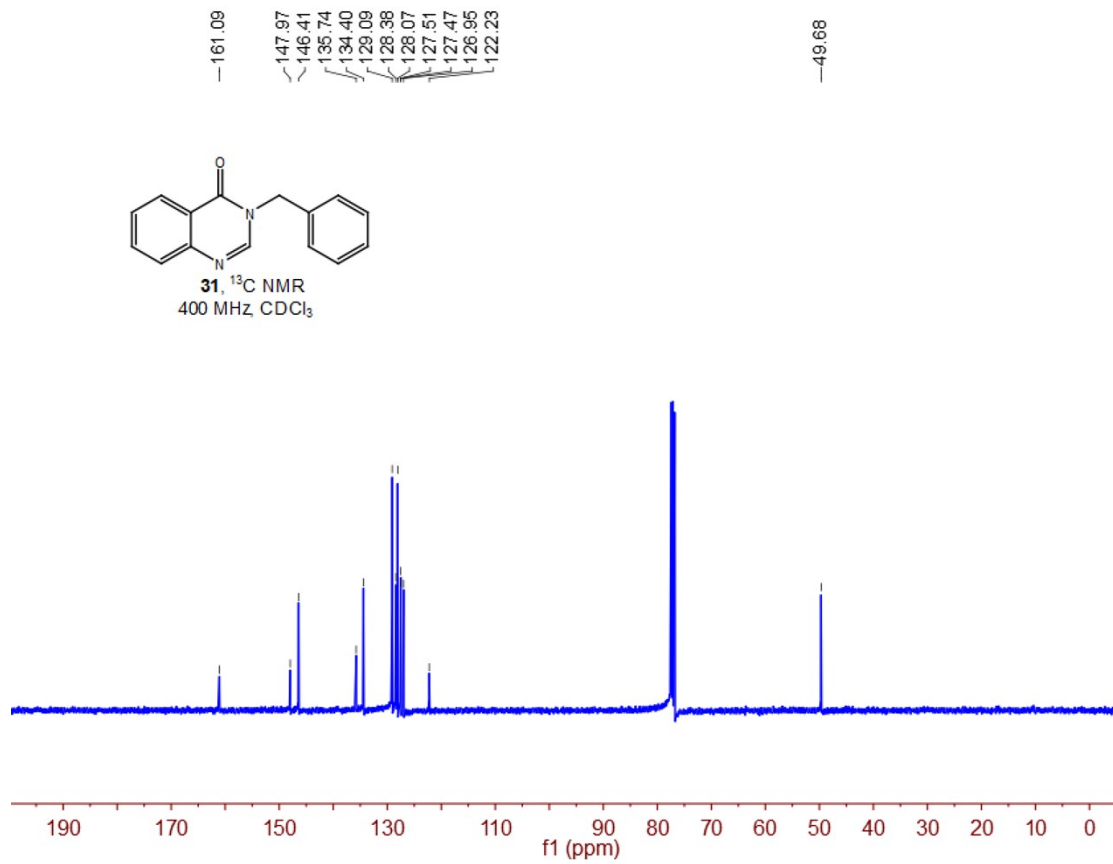

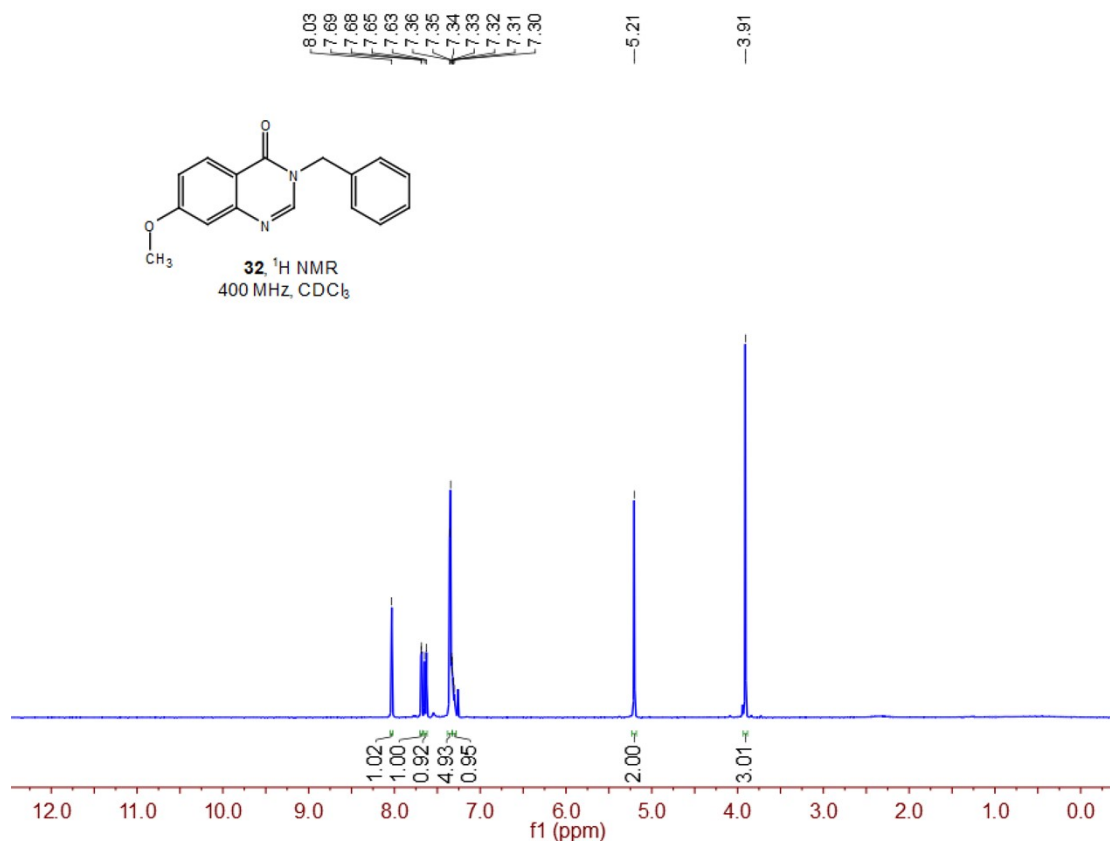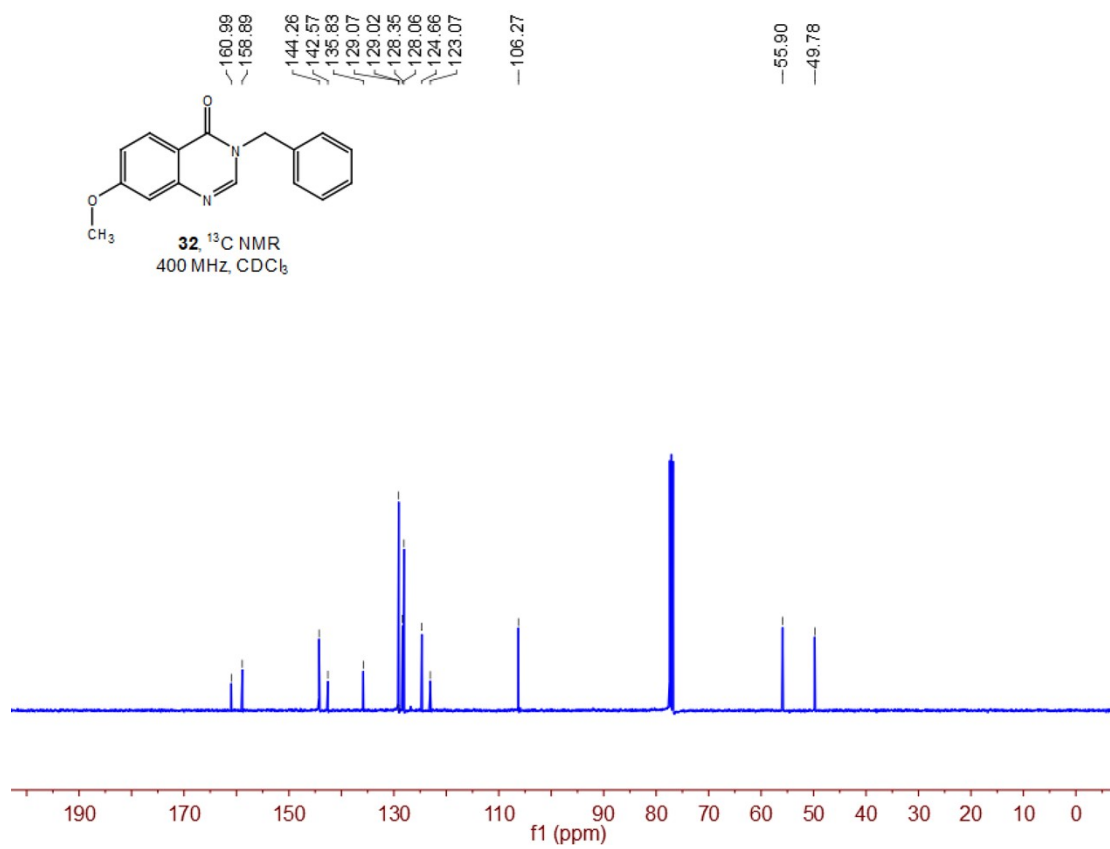

8.54  
8.53  
8.33  
8.30  
8.28  
7.77  
7.75  
7.73  
7.71  
7.69  
7.67  
7.65  
7.50  
7.48  
7.47  
7.43  
7.41  
7.22  
7.21  
7.19  
5.28

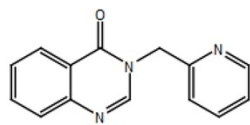

**33**, <sup>1</sup>H NMR  
400 MHz, CDCl<sub>3</sub>

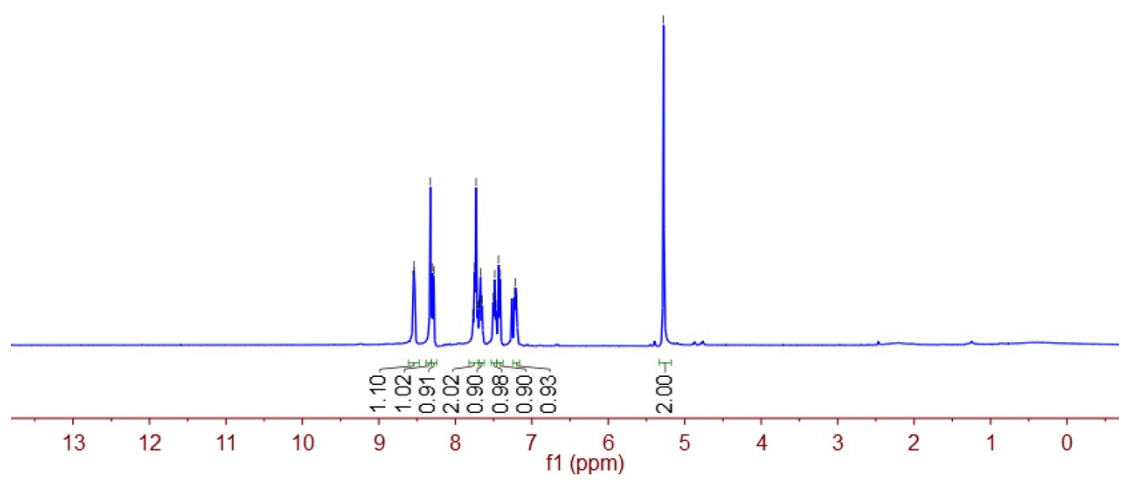

161.13  
154.98  
149.80  
148.30  
147.08  
137.11  
134.37  
127.64  
127.30  
126.84  
123.18  
123.02  
122.23

-51.24

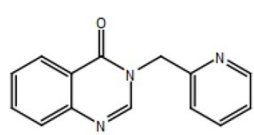

**33**, <sup>13</sup>C NMR  
400 MHz, CDCl<sub>3</sub>

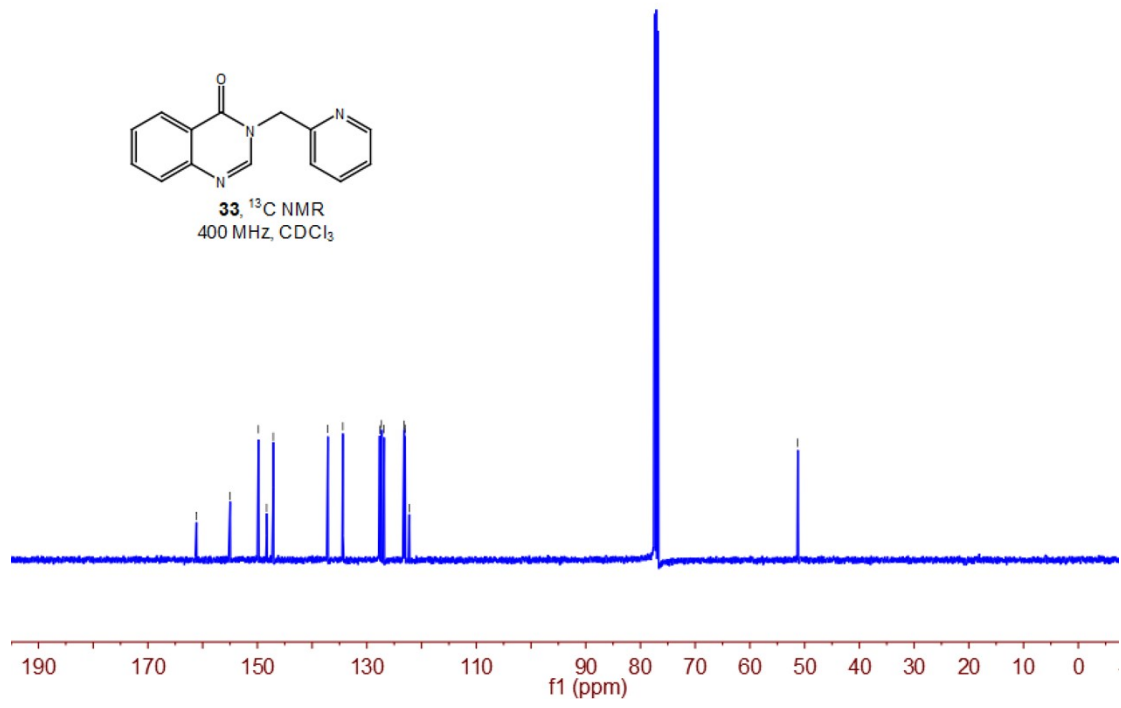

8.42  
8.40  
8.03  
8.01  
7.91  
7.89  
7.86  
7.79  
7.77  
7.75  
7.71  
7.69  
7.56  
7.56  
7.54  
7.54  
7.52  
7.48  
7.46  
7.44  
7.39  
7.36  
5.70

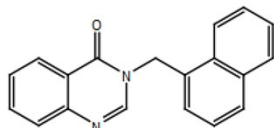

**34**,  $^1\text{H}$  NMR  
400 MHz,  $\text{CDCl}_3$

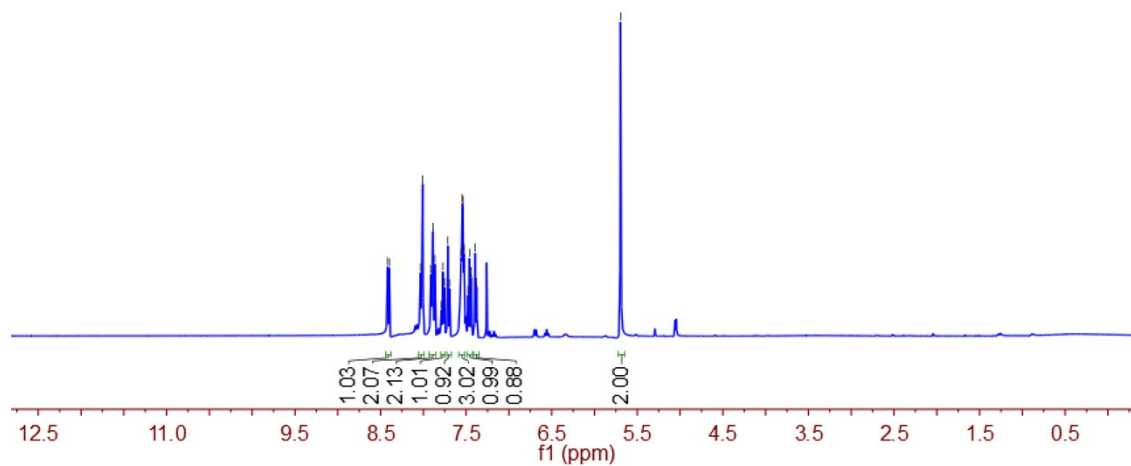

161.09  
147.67  
145.97  
134.51  
134.02  
131.07  
130.78  
129.58  
129.07  
127.56  
127.46  
127.26  
127.22  
127.12  
126.43  
125.43  
123.01  
121.99  
46.84

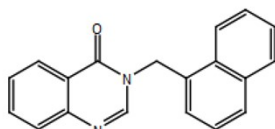

**34**,  $^{13}\text{C}$  NMR  
400 MHz,  $\text{CDCl}_3$

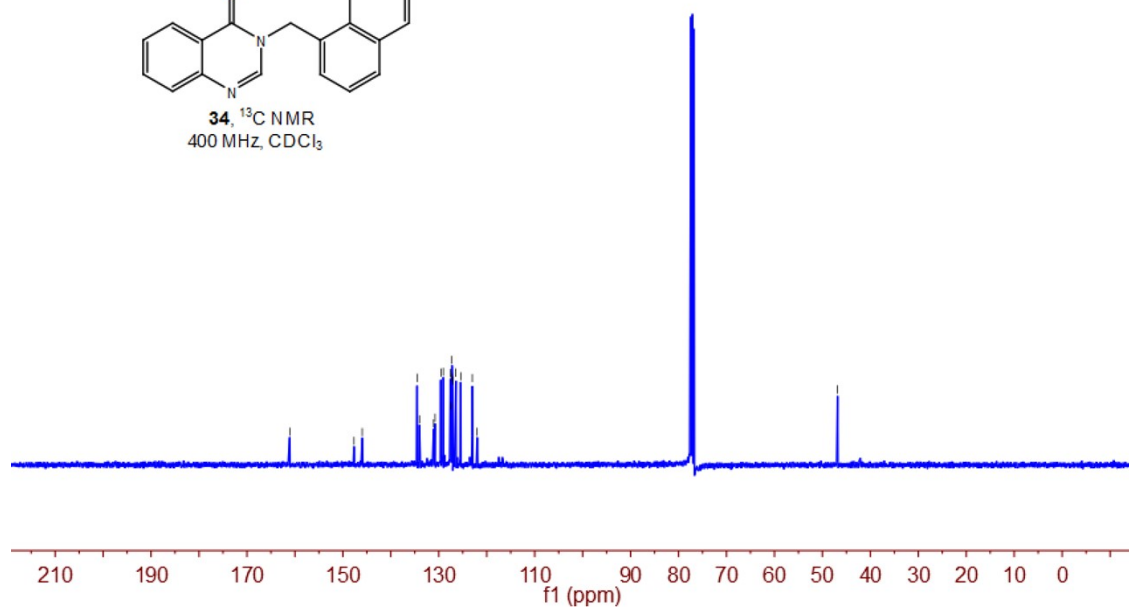

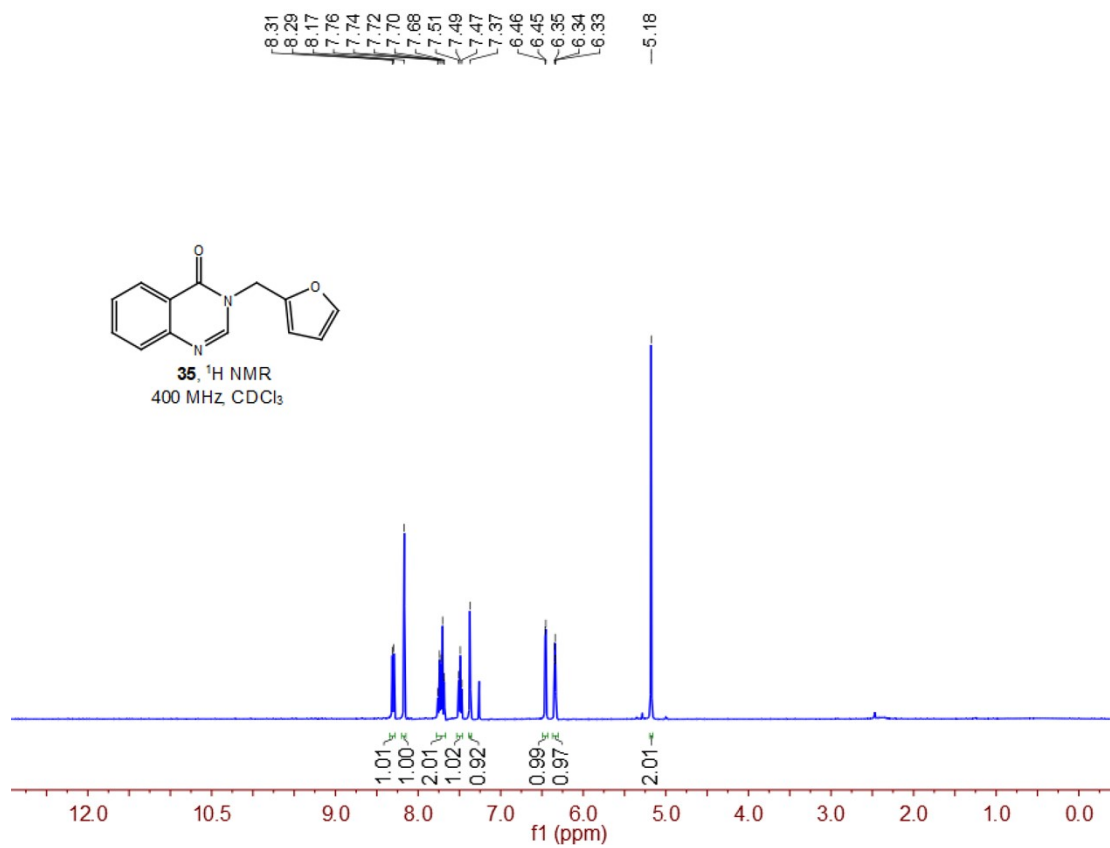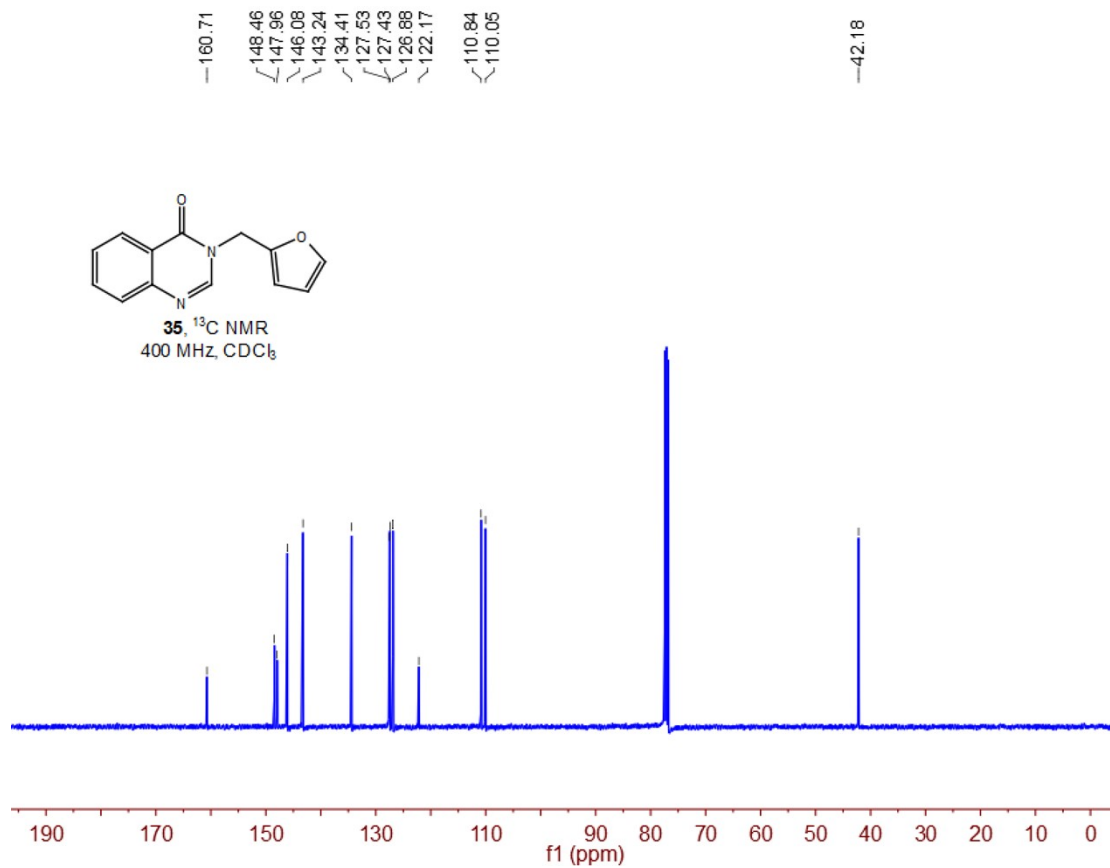

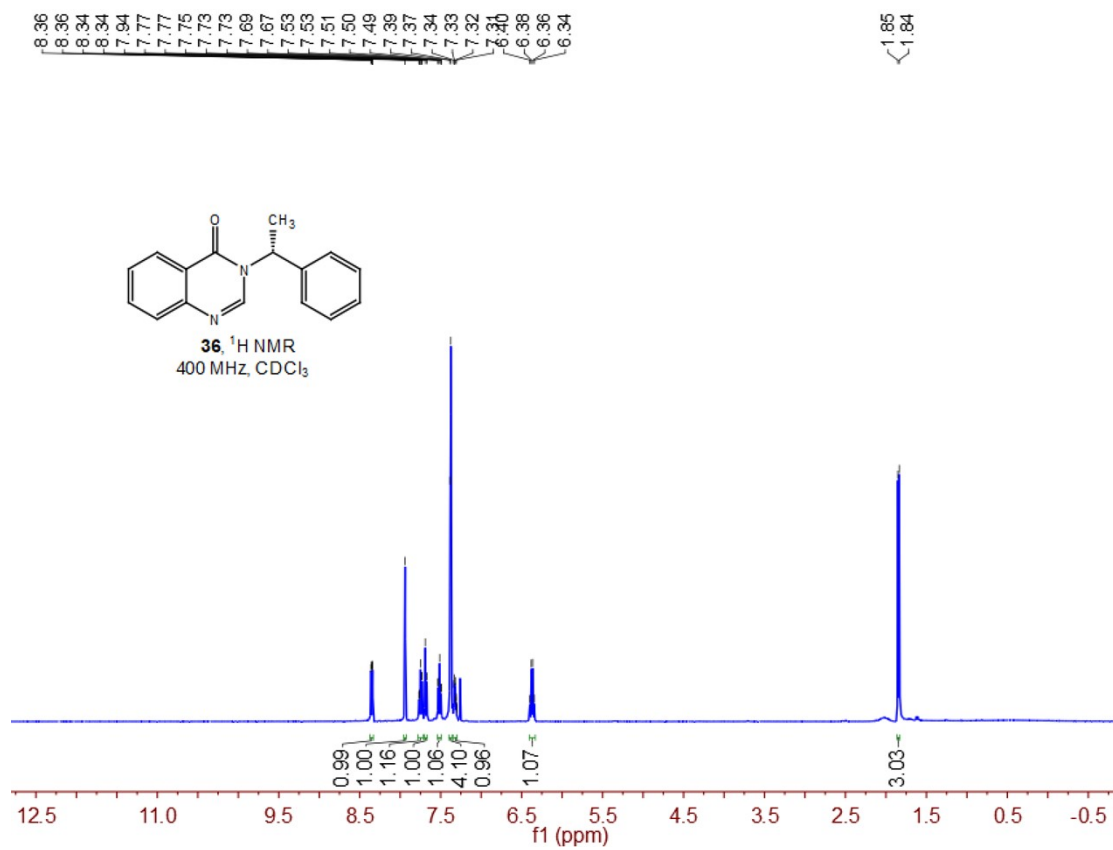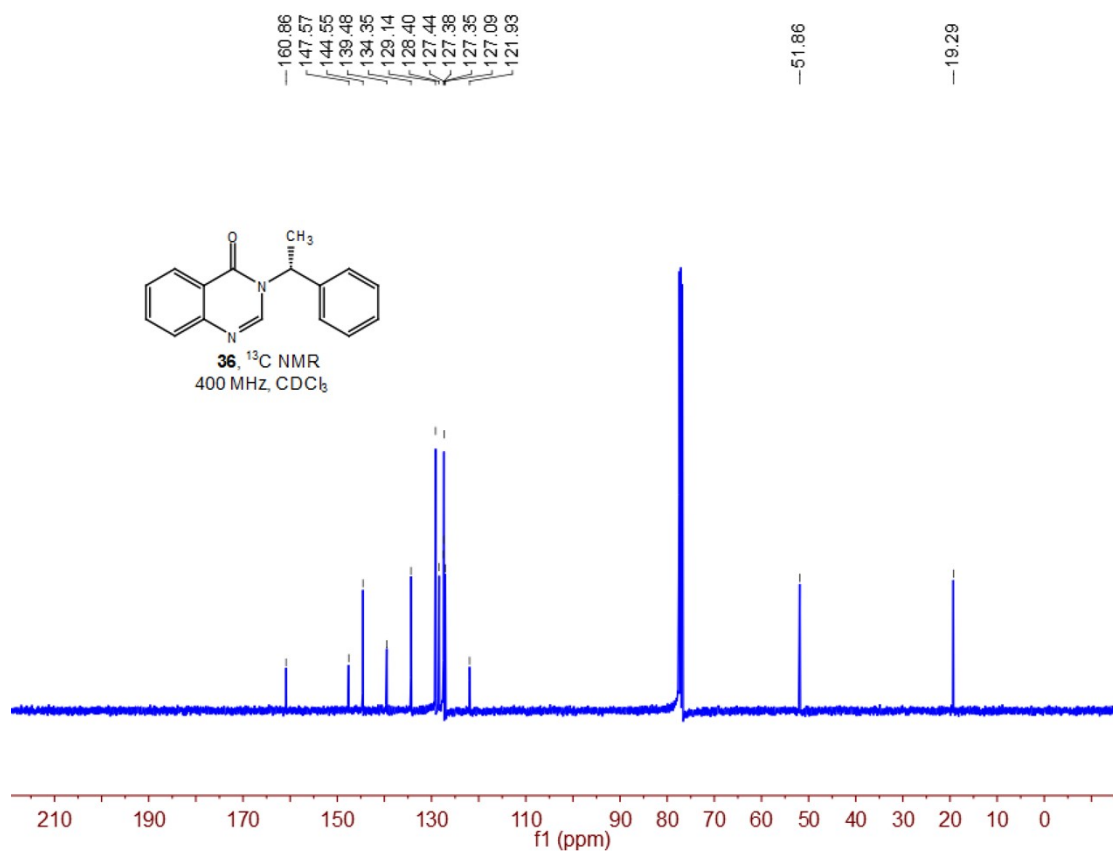



8.35  
8.35  
8.33  
8.33  
7.99  
7.78  
7.78  
7.77  
7.76  
7.76  
7.75  
7.74  
7.72  
7.72  
7.70  
7.70  
7.53  
7.53  
7.51  
7.51  
7.49  
7.49  
7.47  
7.47  
7.40  
7.40  
7.39  
7.39  
7.38  
7.38  
7.36  
7.36  
7.35  
7.35  
7.34  
7.34  
7.23  
7.23  
7.22  
7.22

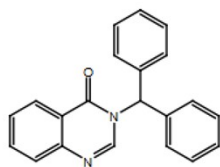

**37**,  $^1\text{H}$  NMR  
400 MHz,  $\text{CDCl}_3$

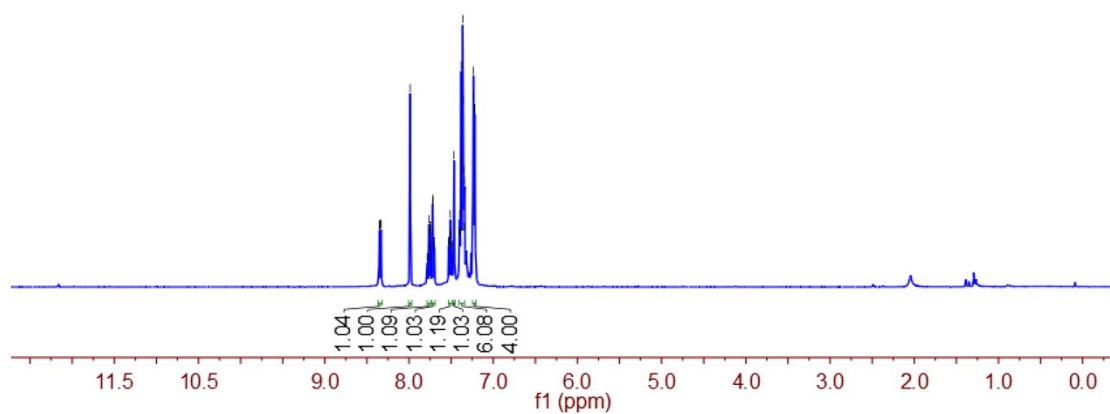

160.92  
147.60  
145.46  
138.05  
134.46  
129.09  
128.60  
128.40  
127.50  
127.42  
127.17  
121.87

60.78

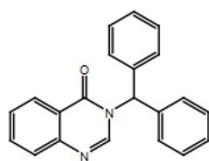

**37**,  $^{13}\text{C}$  NMR  
400 MHz,  $\text{CDCl}_3$

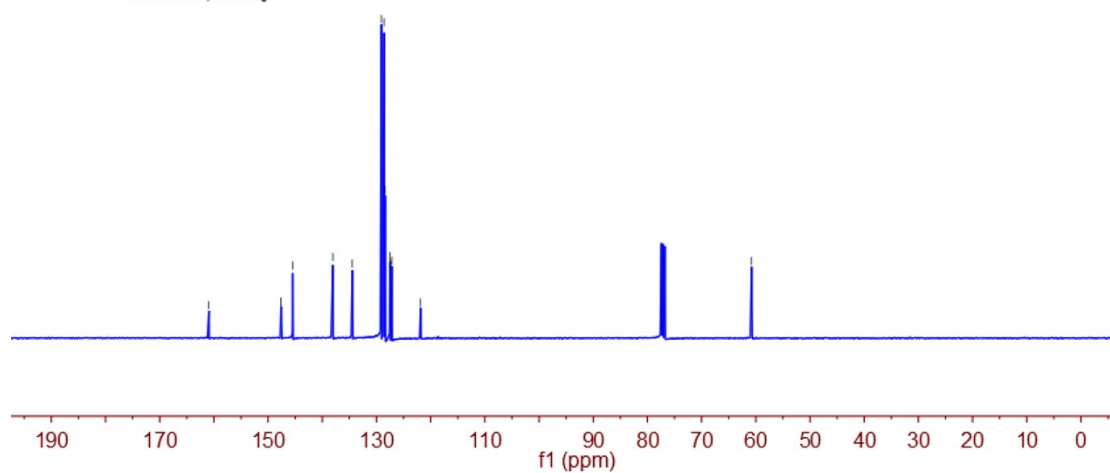

8.36  
8.36  
8.36  
8.13  
7.83  
7.82  
7.81  
7.80  
7.79  
7.78  
7.76  
7.57  
7.57  
7.55  
7.55  
7.53  
7.51  
7.50  
7.49  
7.48  
7.47  
7.44  
7.43  
7.42

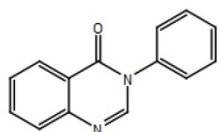

**38**,  $^1\text{H NMR}$   
400 MHz,  $\text{CDCl}_3$

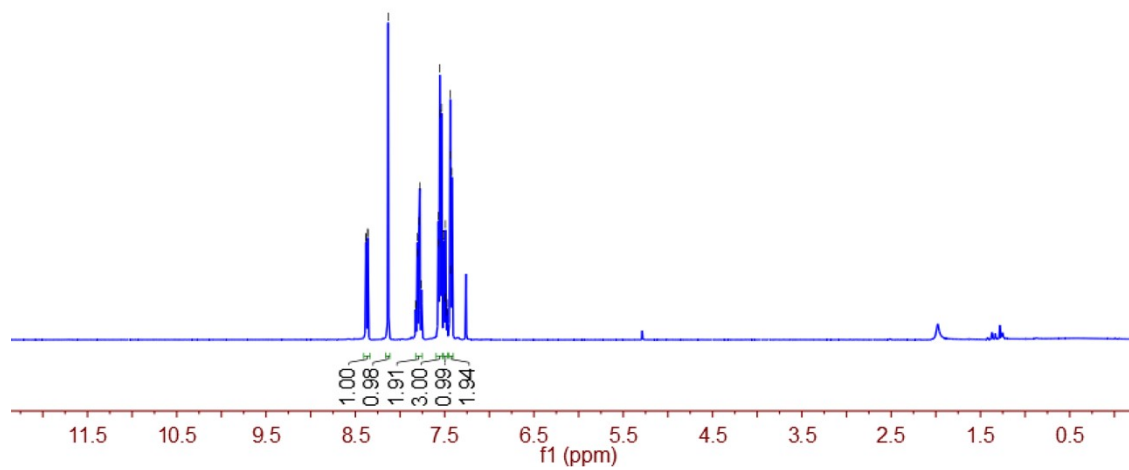

160.80  
147.89  
146.16  
137.55  
134.66  
129.72  
129.19  
127.73  
127.62  
127.26  
127.07  
122.44

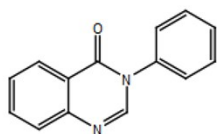

**38**,  $^{13}\text{C NMR}$   
400 MHz,  $\text{CDCl}_3$

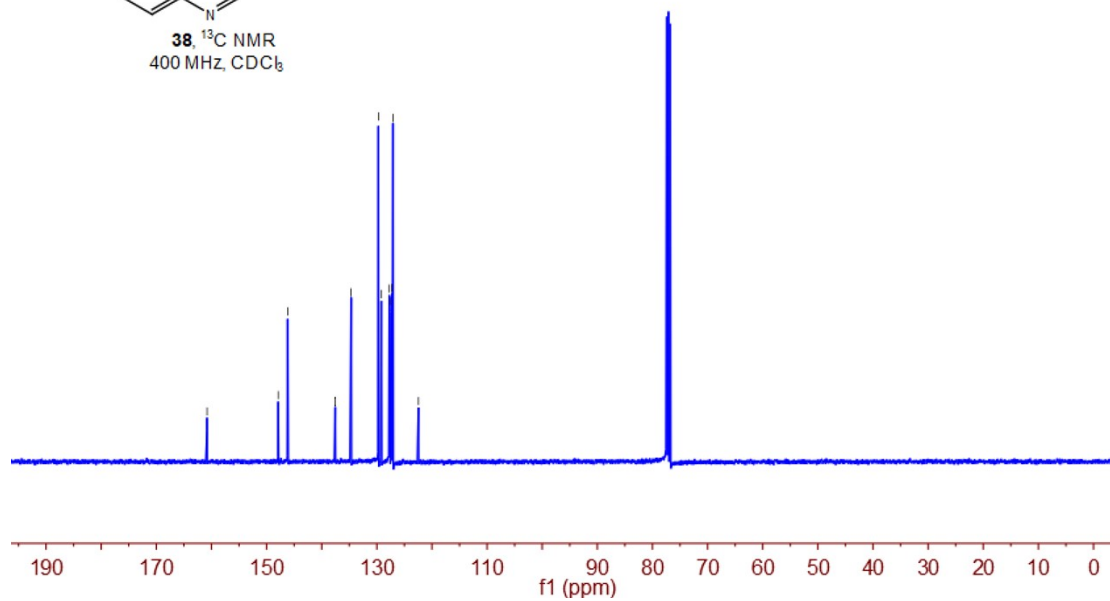

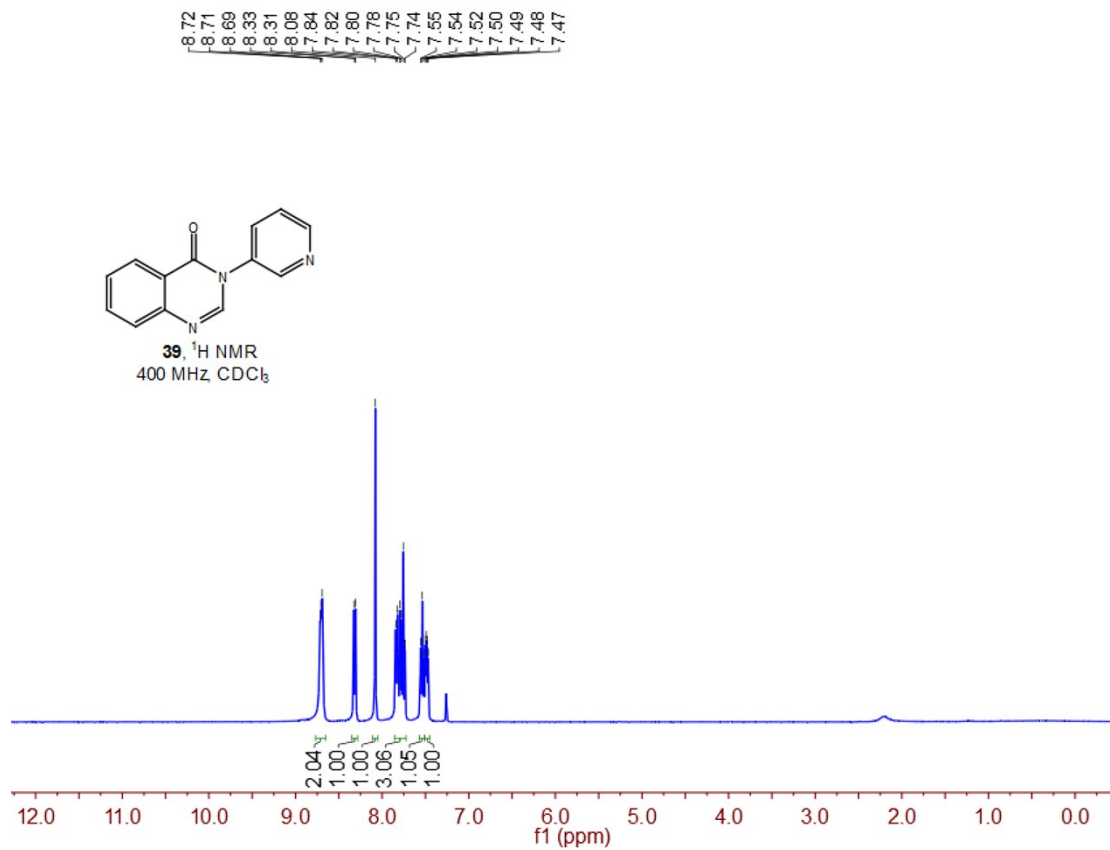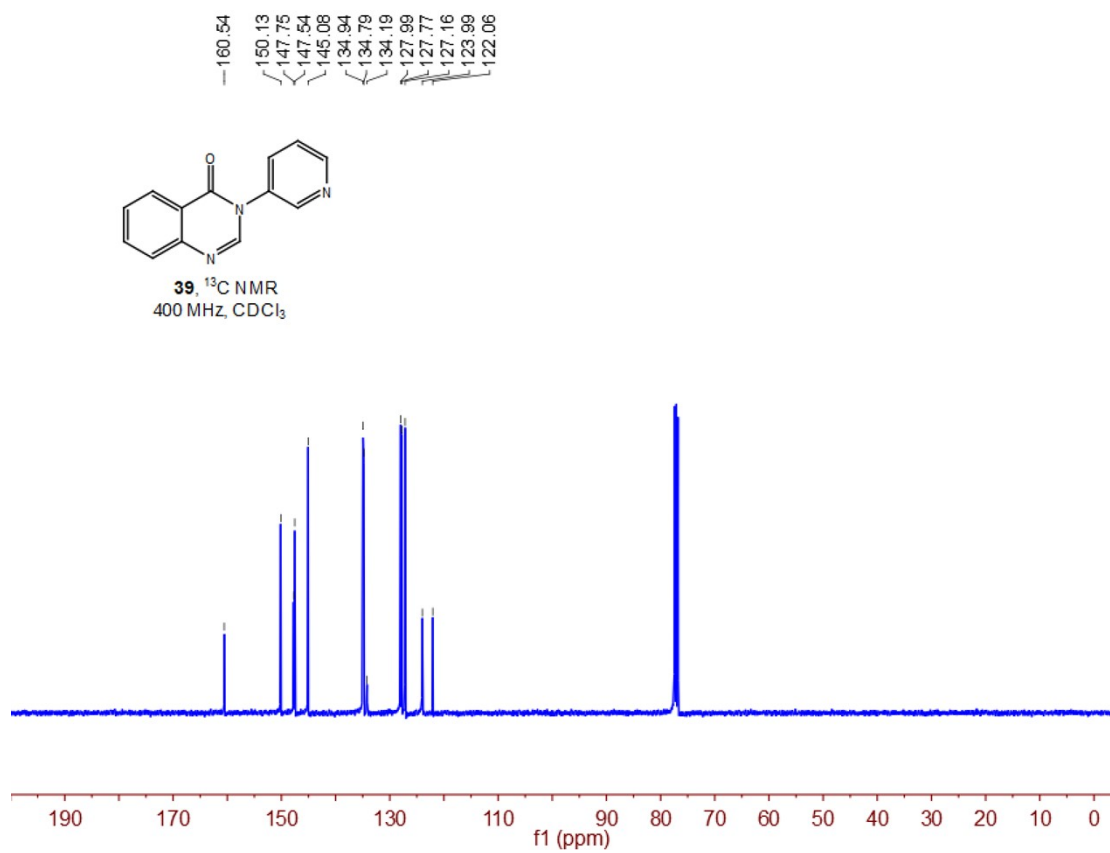

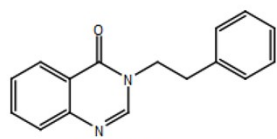

**40**,  $^1\text{H}$  NMR  
400 MHz,  $\text{CDCl}_3$

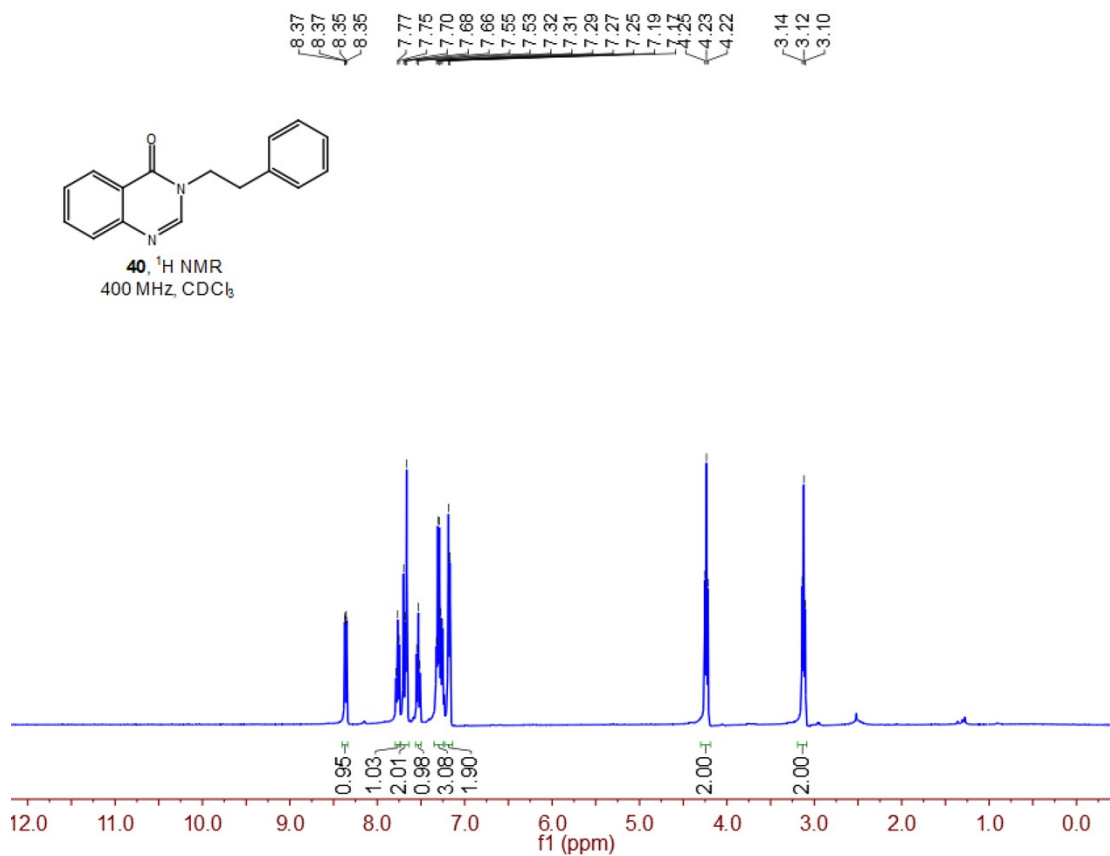

Chemical shift values (ppm): 161.06, 148.11, 146.50, 137.45, 134.23, 128.93, 128.92, 127.48, 127.26, 127.09, 126.69, 122.11, 48.92, 35.18.

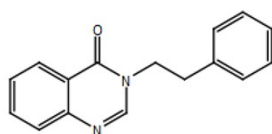

**40**,  $^{13}\text{C}$  NMR  
400 MHz,  $\text{CDCl}_3$

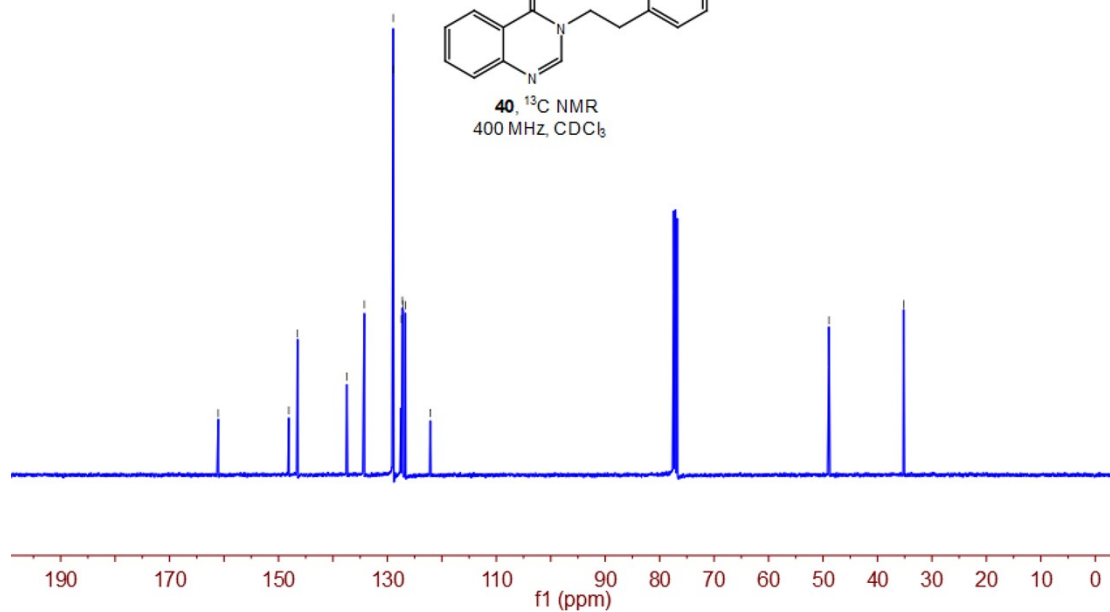

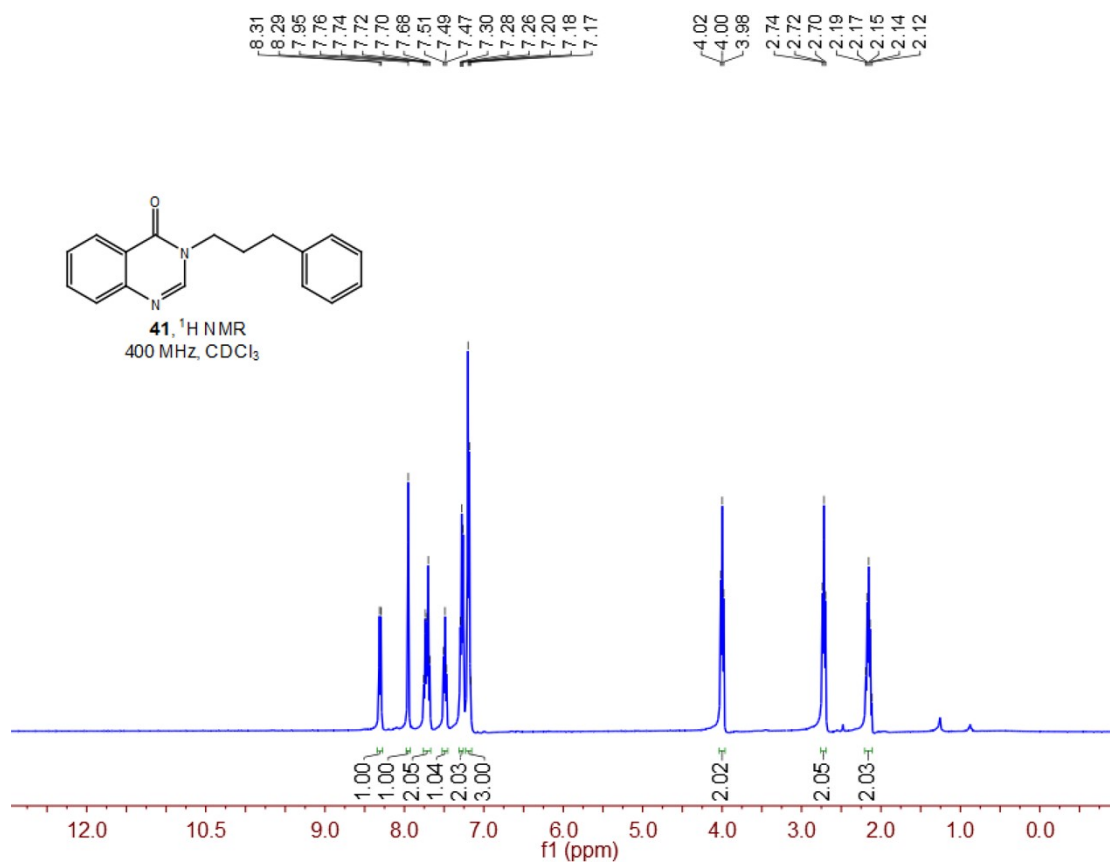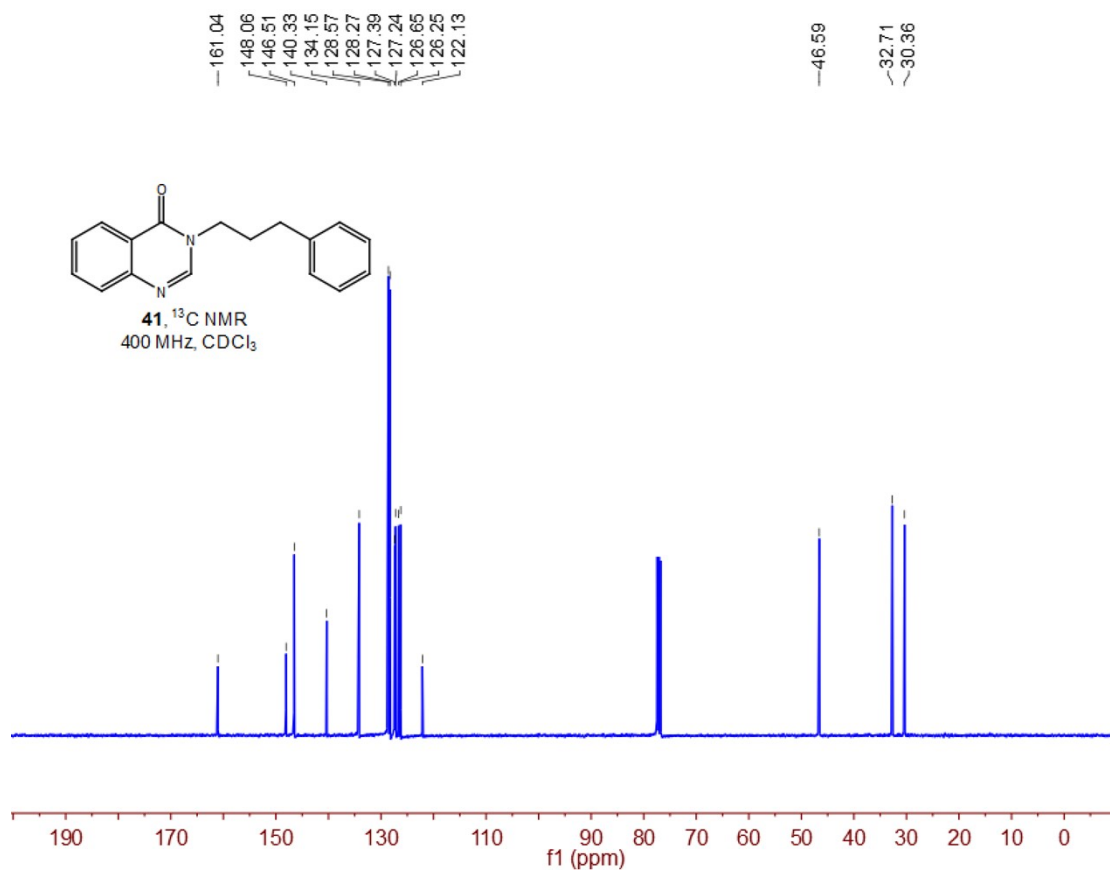

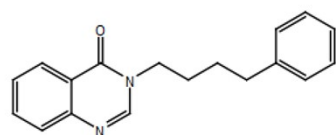

**42**,  $^1\text{H NMR}$   
400 MHz,  $\text{CDCl}_3$

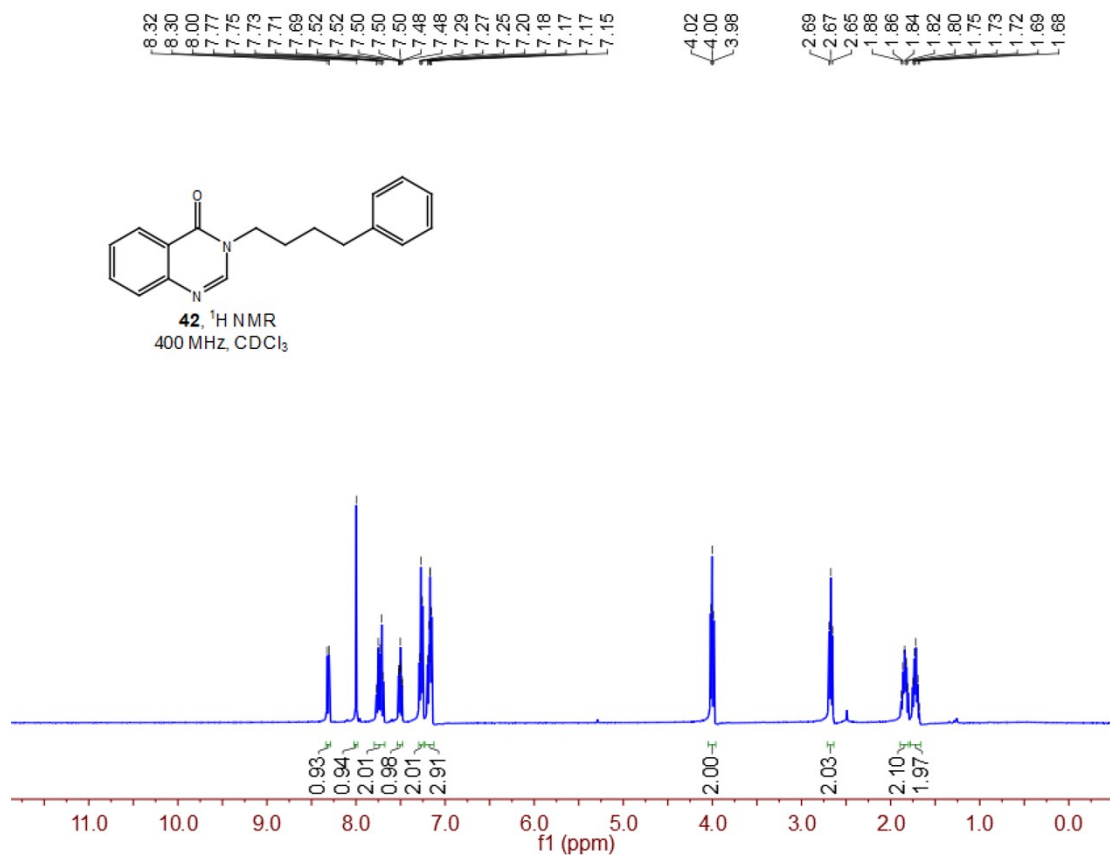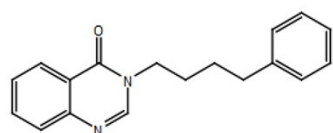

**42**,  $^{13}\text{C NMR}$   
400 MHz,  $\text{CDCl}_3$

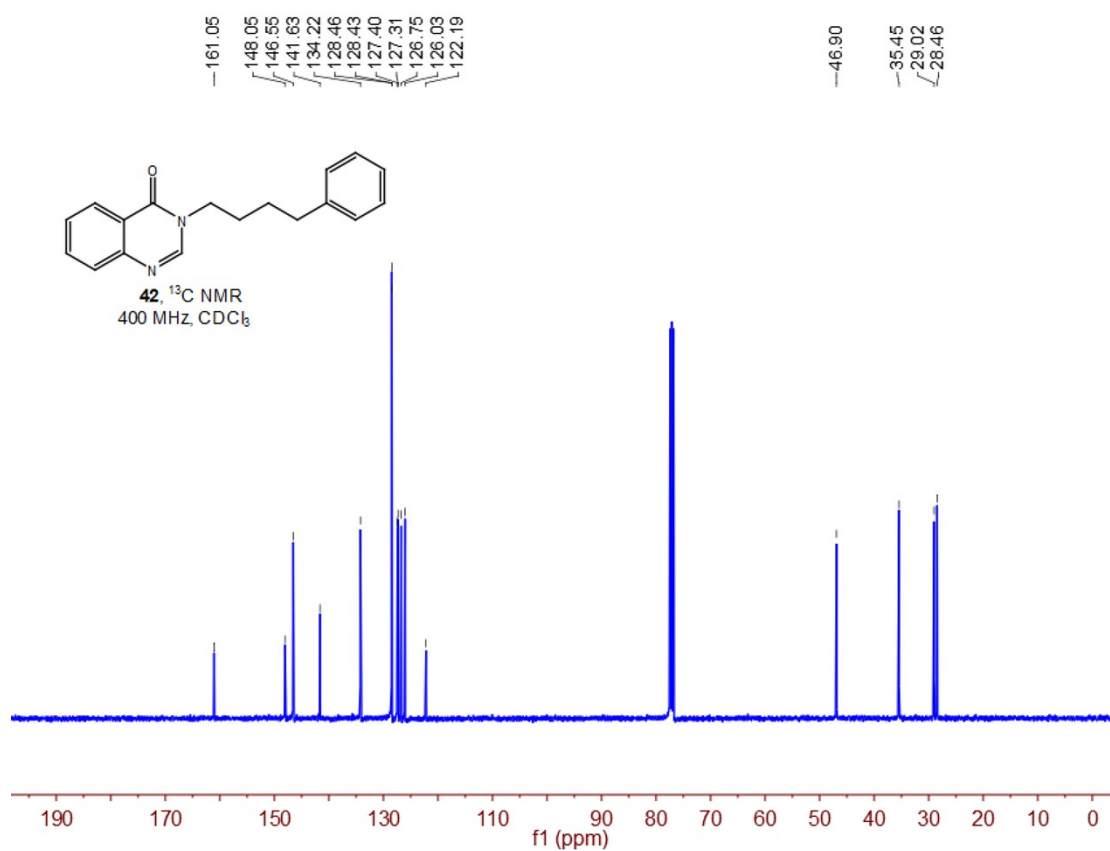

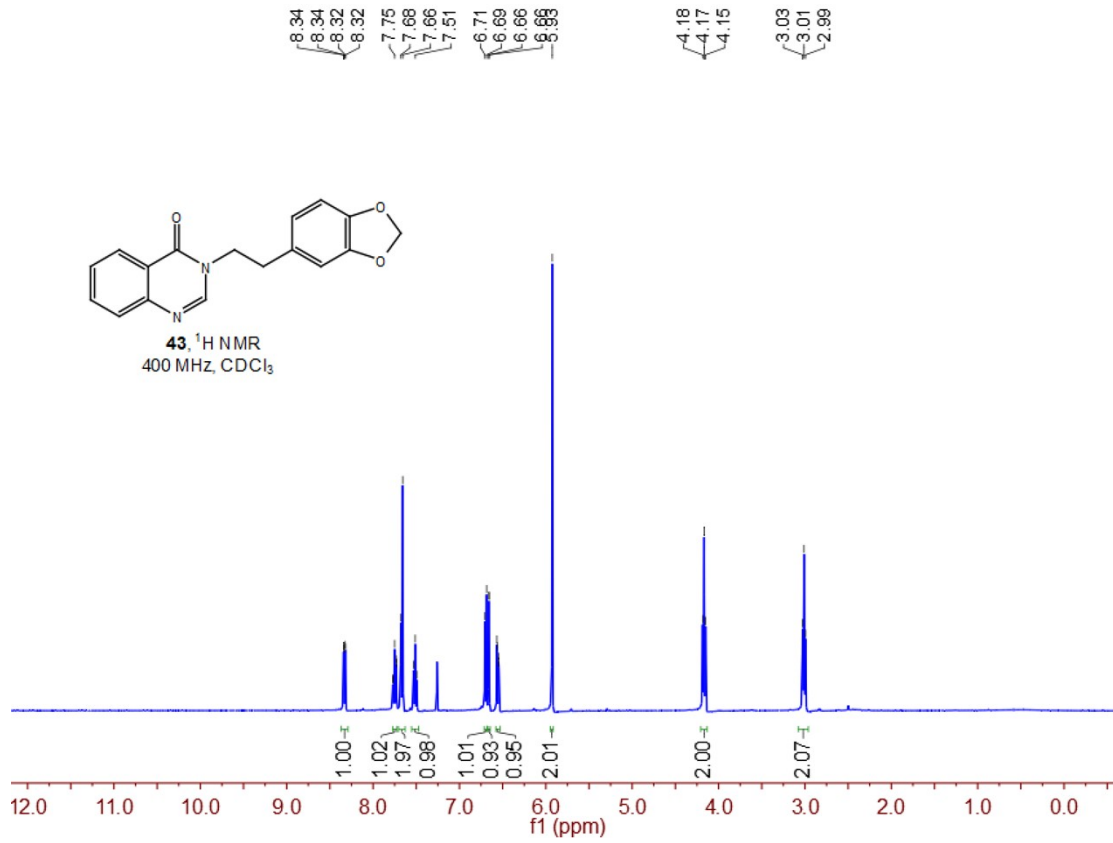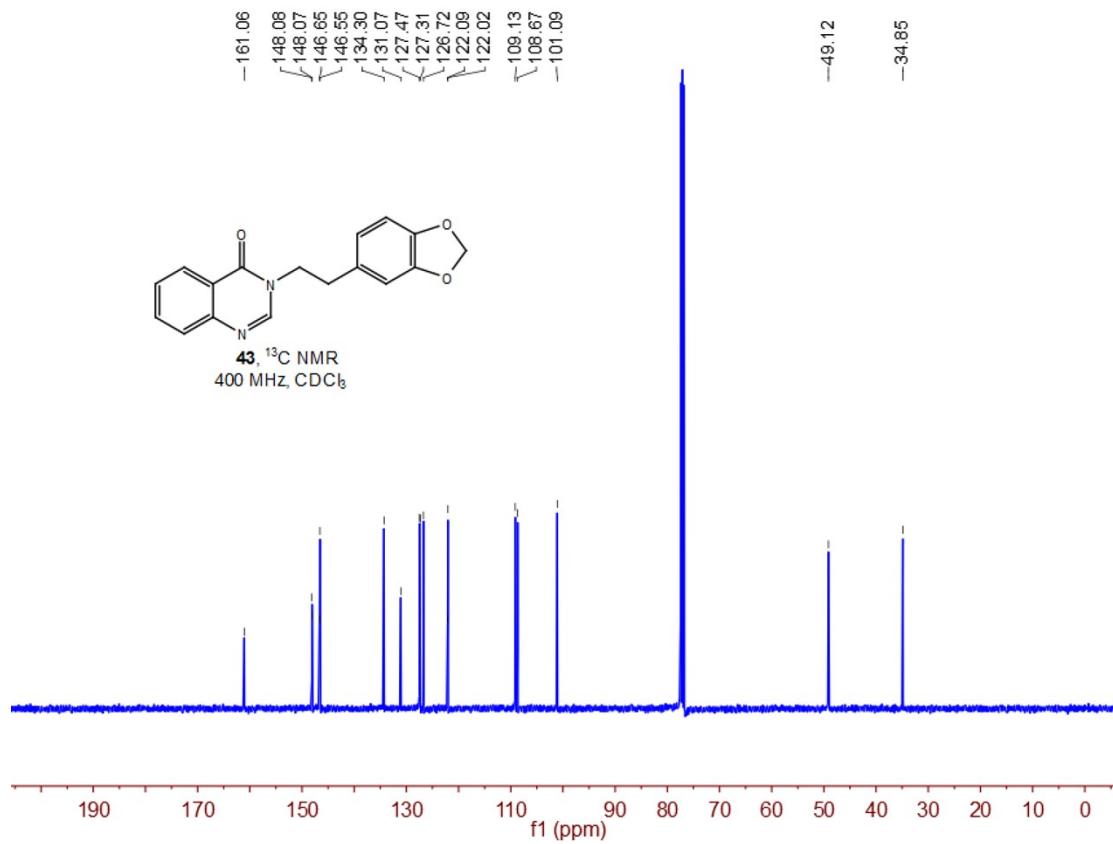

— 12.23

8.13  
8.11  
8.09  
7.81  
7.79  
7.77  
7.66  
7.64  
7.52  
7.51  
7.49

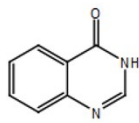

**44**,  $^1\text{H}$  NMR  
400 MHz, DMSO-*d*<sub>6</sub>

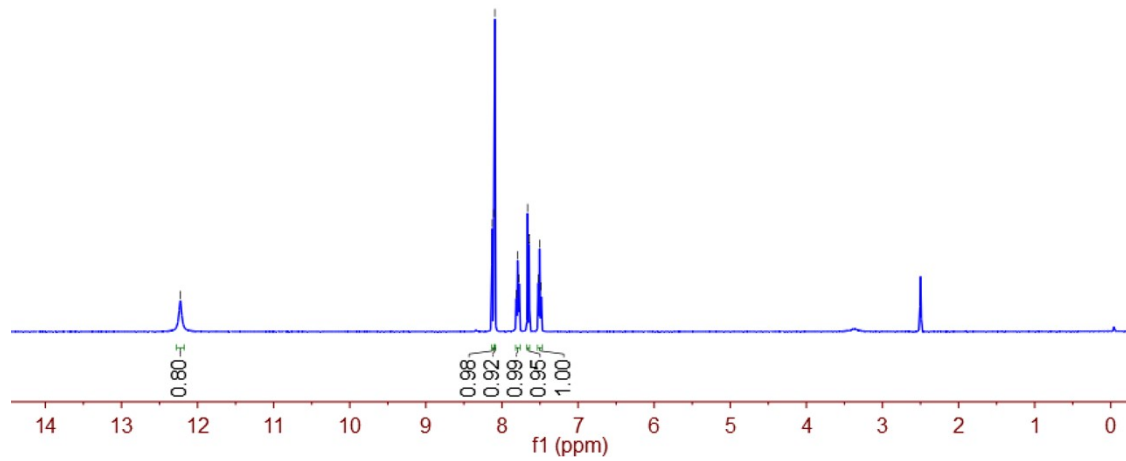

160.85  
148.80  
145.48  
134.36  
127.25  
126.79  
125.91  
122.71

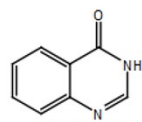

**44**,  $^{13}\text{C}$  NMR  
400 MHz, DMSO-*d*<sub>6</sub>

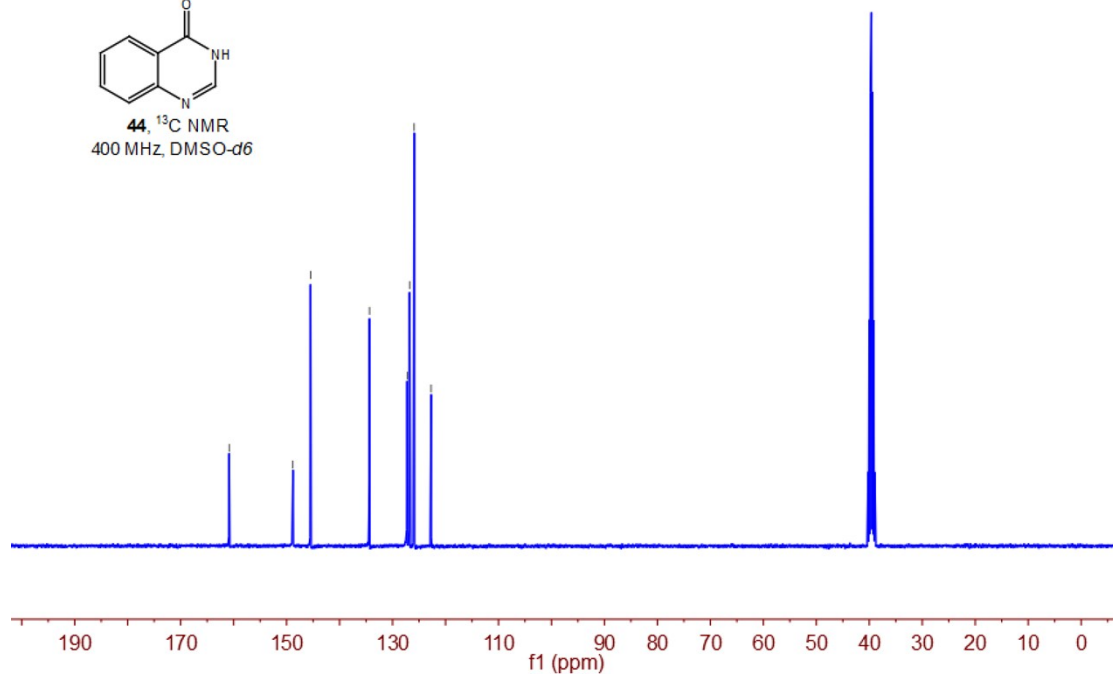



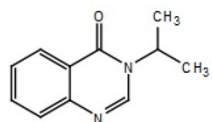

**45**  $^1\text{H}$  NMR  
400 MHz,  $\text{CDCl}_3$

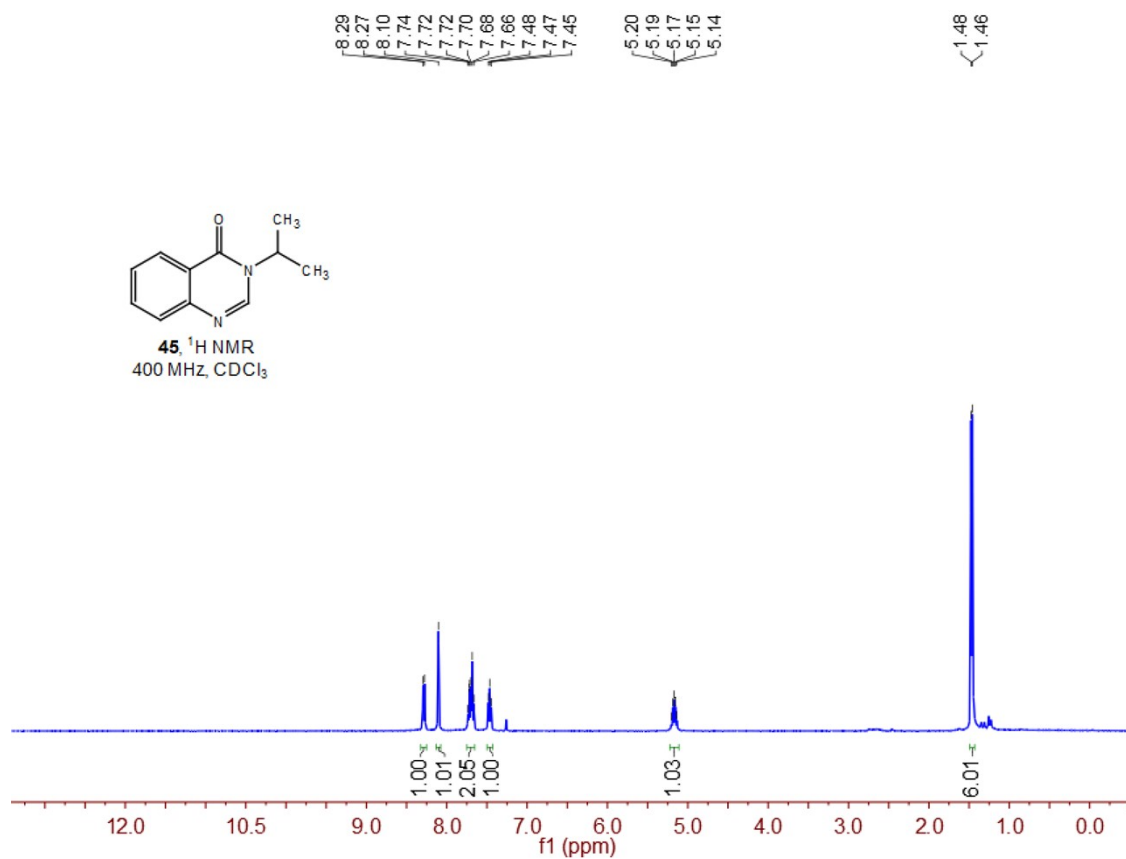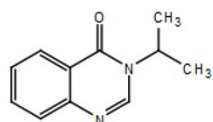

**45**  $^{13}\text{C}$  NMR  
400 MHz,  $\text{CDCl}_3$

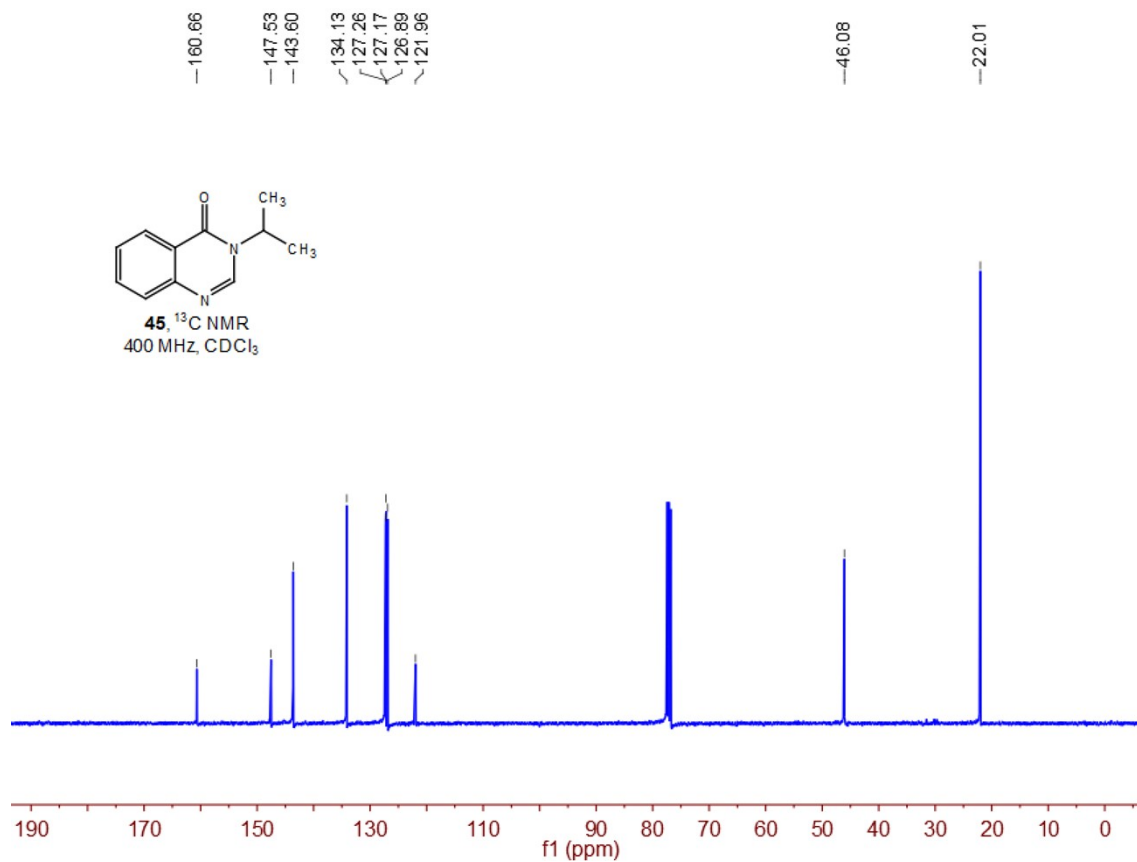

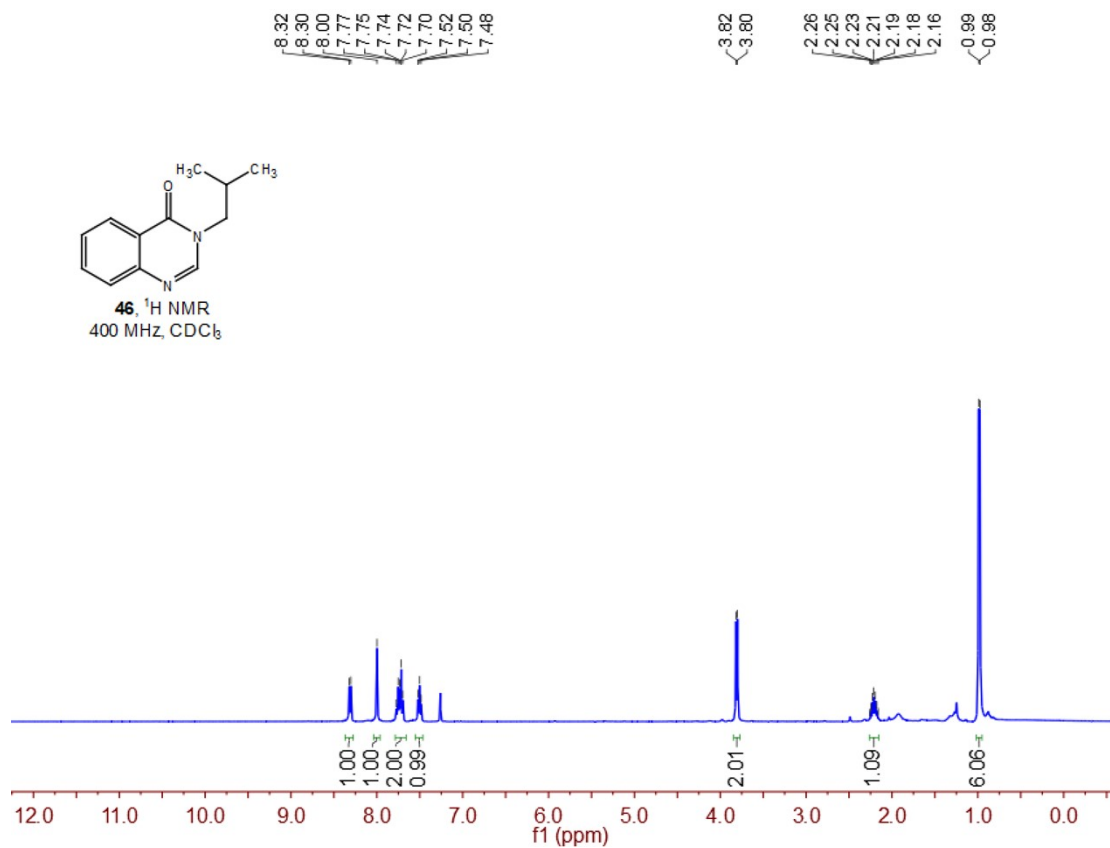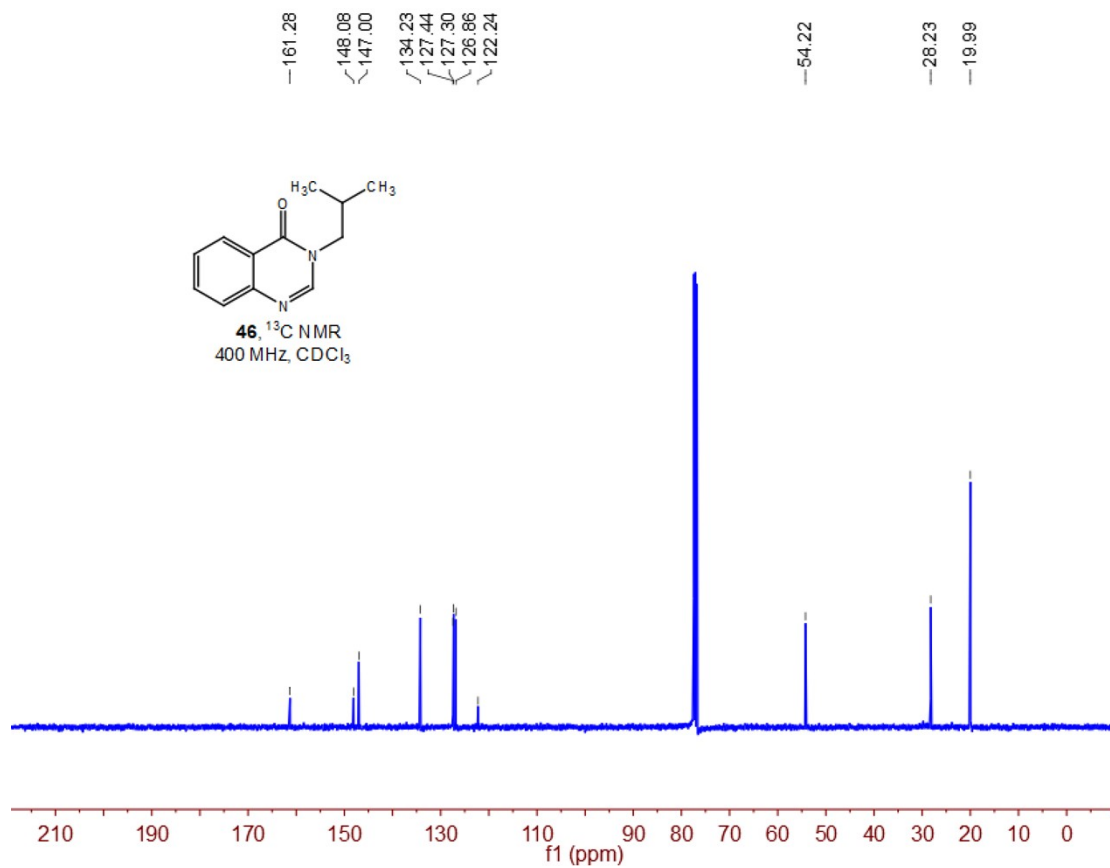

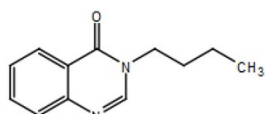

47, <sup>1</sup>H NMR  
400 MHz, CDCl<sub>3</sub>

8.30  
8.28  
8.02  
7.75  
7.73  
7.73  
7.72  
7.71  
7.70  
7.68  
7.50  
7.48  
7.46

4.01  
3.99  
3.97

1.80  
1.79  
1.77  
1.75  
1.73  
1.45  
1.43  
1.41  
1.39  
1.37  
1.35  
0.98  
0.96

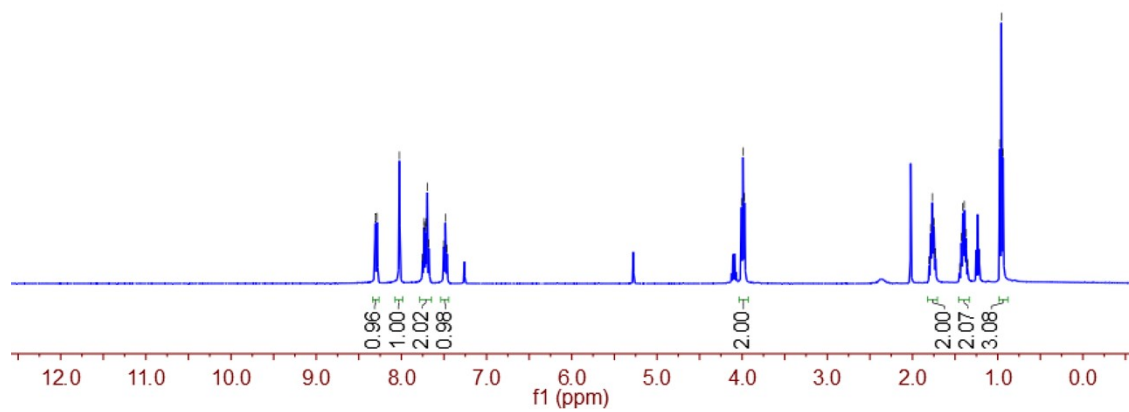

161.08  
148.09  
146.65  
134.17  
127.39  
127.26  
126.74  
122.23

46.86  
31.47  
19.94  
13.68

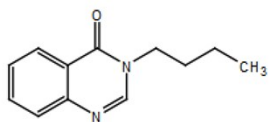

47, <sup>13</sup>C NMR  
400 MHz, CDCl<sub>3</sub>

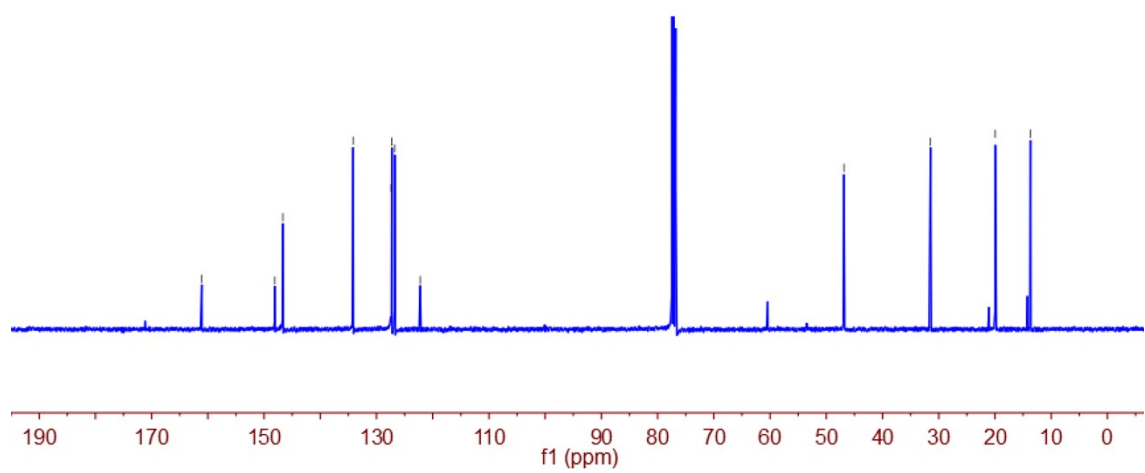

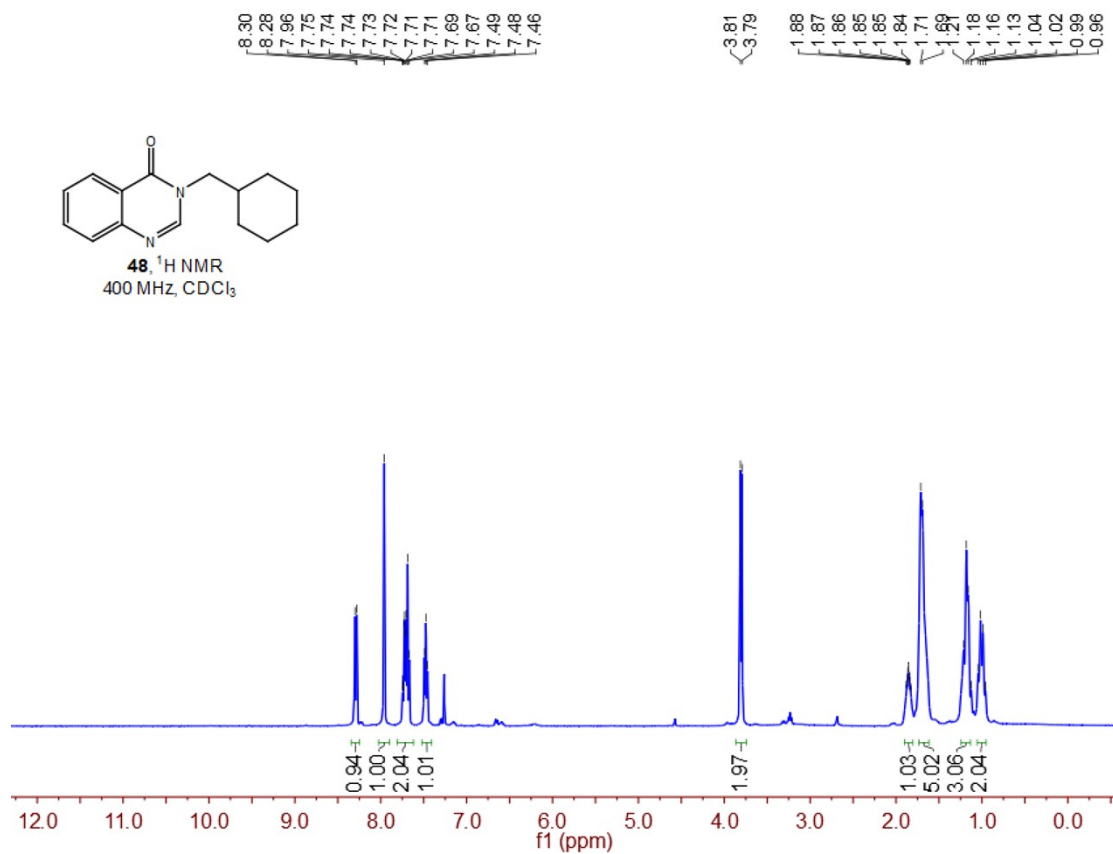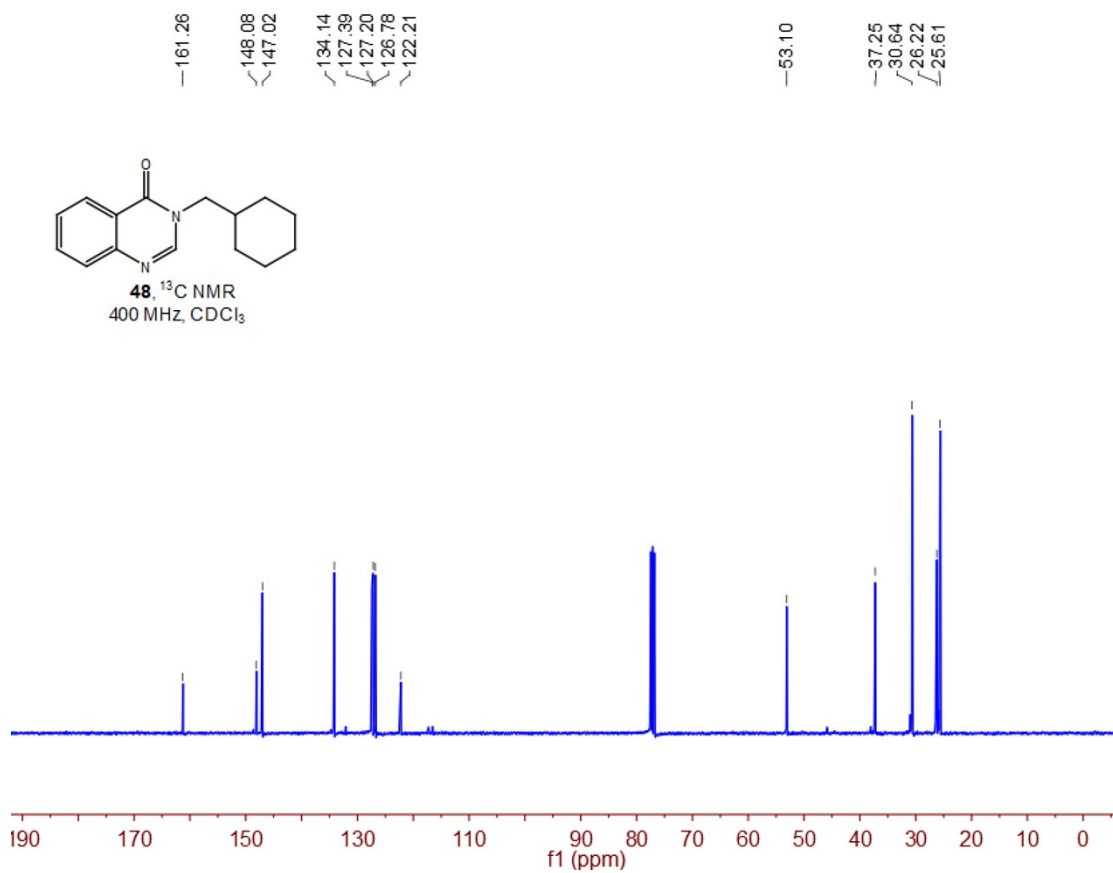

8.31  
8.29  
8.11  
7.76  
7.75  
7.74  
7.73  
7.72  
7.72  
7.70  
7.70  
7.68  
7.51  
7.50  
7.49  
7.49  
7.48  
7.47  
7.47  
4.95  
4.94  
4.93  
4.92  
4.91  
4.91  
4.90  
4.89  
4.88  
2.08  
2.06  
2.06  
2.05  
2.04  
2.03  
2.02  
2.02  
2.01  
1.93  
1.92  
1.90  
1.89  
1.88  
1.87  
1.86  
1.84  
1.83  
1.81  
1.74  
1.73  
1.73  
1.71  
1.66  
1.64  
1.62  
1.60  
1.58

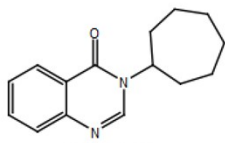

**49**,  $^1\text{H}$  NMR  
400 MHz,  $\text{CDCl}_3$

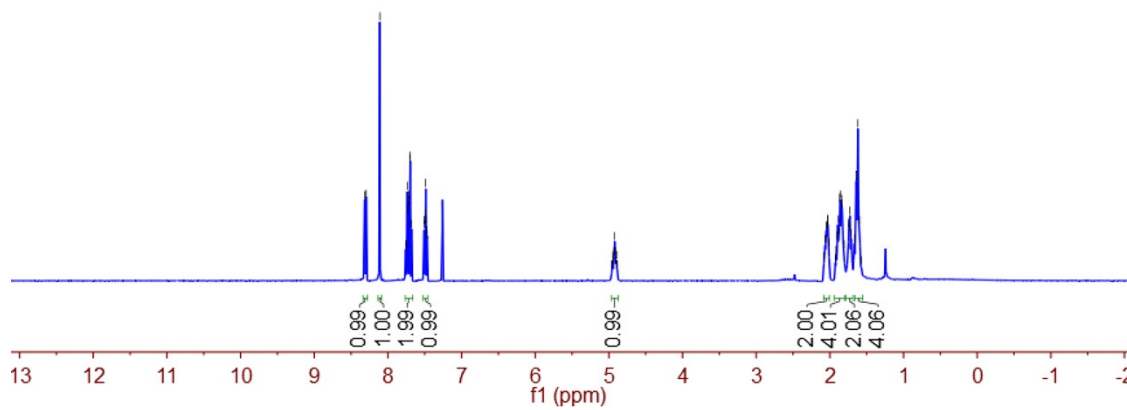

160.40  
147.48  
144.48  
134.14  
127.24  
127.20  
127.00  
122.03  
55.72  
35.15  
27.36  
25.34

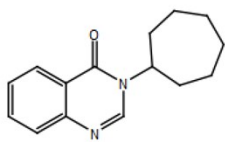

**49**,  $^{13}\text{C}$  NMR  
400 MHz,  $\text{CDCl}_3$

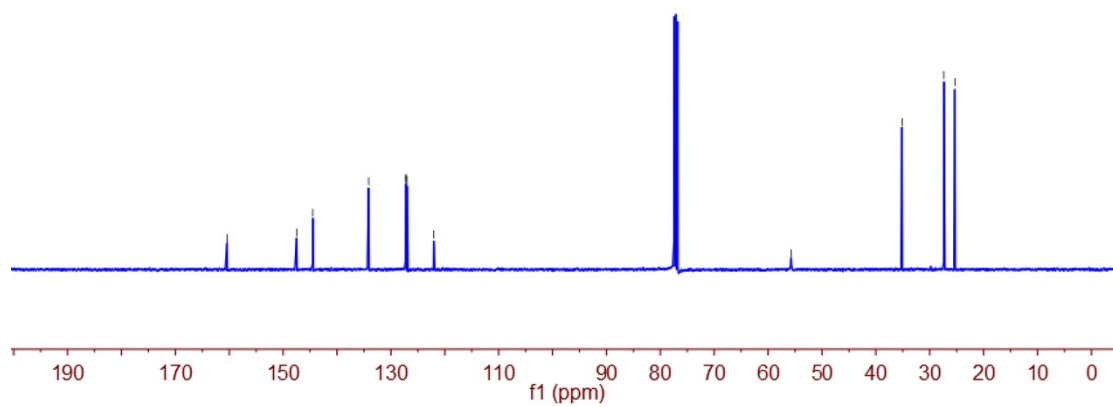

8.32  
8.30  
8.30  
8.13  
7.78  
7.76  
7.76  
7.74  
7.74  
7.72  
7.71  
7.70  
7.52  
7.52  
7.50  
7.49  
7.48  
5.12  
5.11  
5.10  
5.09  
5.08  
4.17  
4.14  
3.64  
3.63  
3.61  
3.60  
2.06  
2.05  
2.03  
2.01  
2.00  
1.98  
1.97  
1.95  
1.95  
1.94  
1.92  
1.91

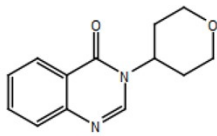

**50**,  $^1\text{H NMR}$   
400 MHz,  $\text{CDCl}_3$

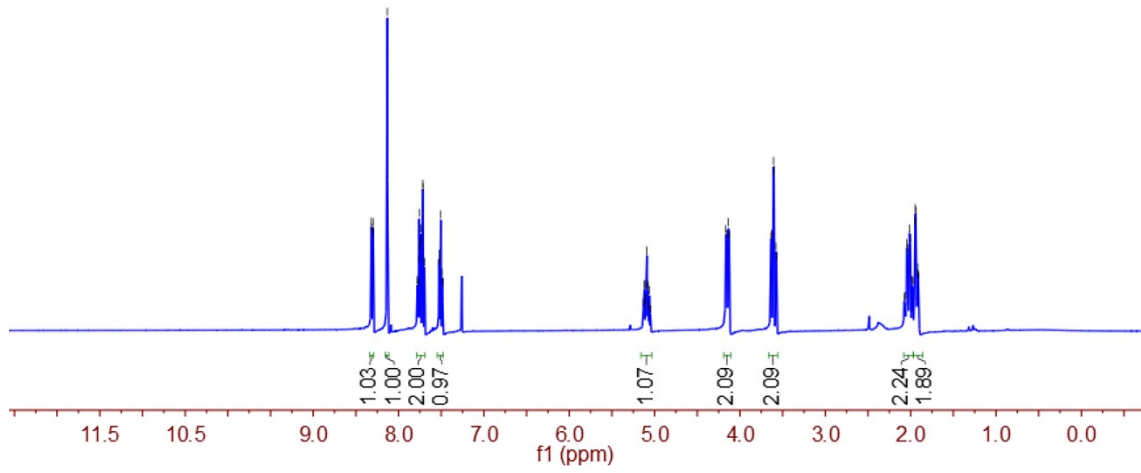

160.68  
147.96  
143.45  
134.44  
127.44  
127.39  
127.03  
121.71  
67.44  
50.49  
32.40

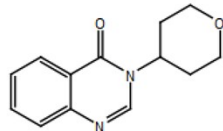

**50**,  $^{13}\text{C NMR}$   
400 MHz,  $\text{CDCl}_3$

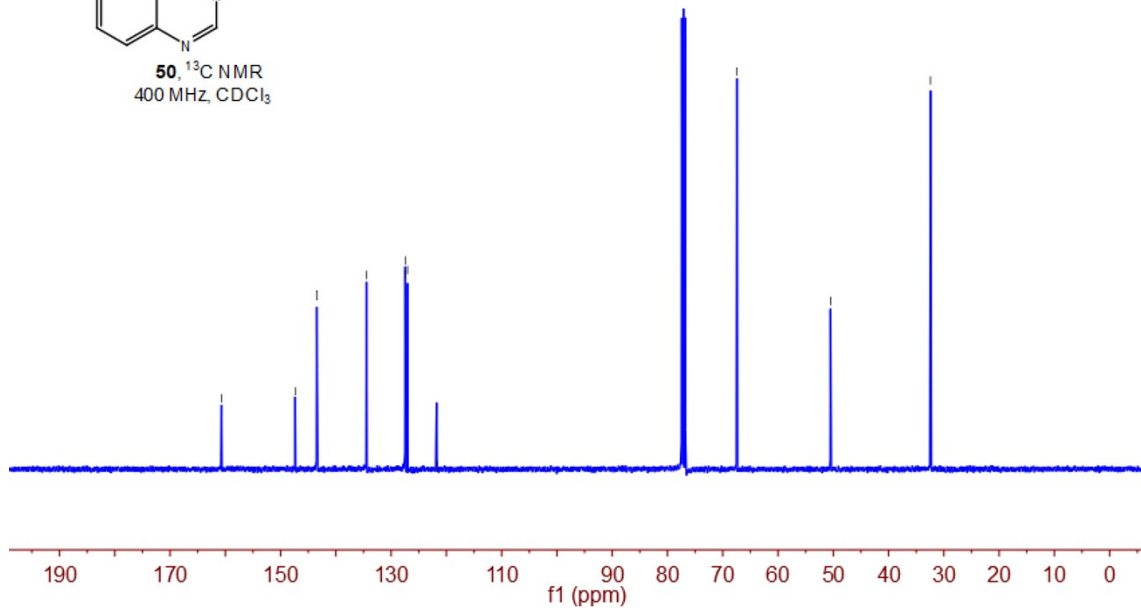

8.31  
8.31  
8.29  
8.29  
8.15  
7.76  
7.74  
7.74  
7.73  
7.72  
7.72  
7.71  
7.70  
7.51  
7.50  
7.49  
7.47  
7.47  
4.36  
4.36  
4.33  
4.32  
4.24  
4.24  
4.23  
4.22  
4.21  
4.20  
3.90  
3.88  
3.87  
3.85  
3.83  
3.77  
3.75  
3.74  
3.72  
2.13  
2.11  
2.10  
2.08  
2.07  
2.05  
1.92  
1.90  
1.89  
1.87  
1.86  
1.65  
1.63  
1.61  
1.59  
1.58

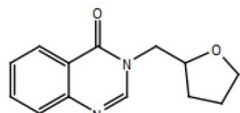

**51**,  $^1\text{H}$  NMR  
400 MHz,  $\text{CDCl}_3$

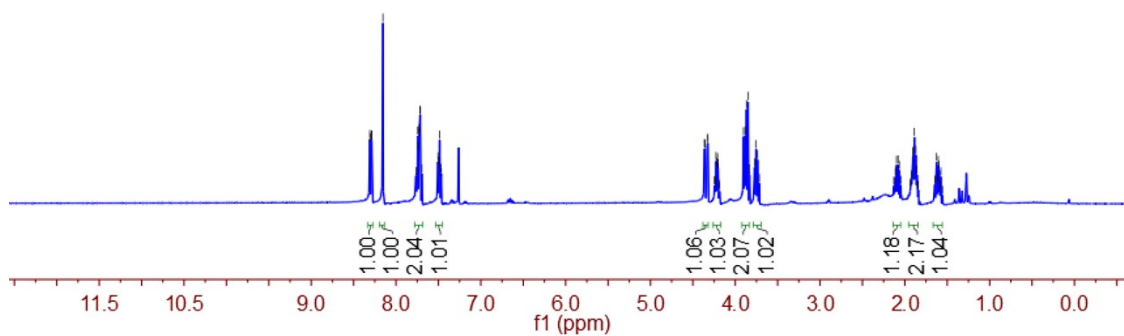

-161.34  
148.11  
147.57  
134.29  
127.47  
127.16  
126.81  
122.05  
-76.89  
-68.25  
-49.58  
-28.85  
-25.87

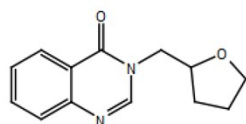

**51**,  $^{13}\text{C}$  NMR  
400 MHz,  $\text{CDCl}_3$

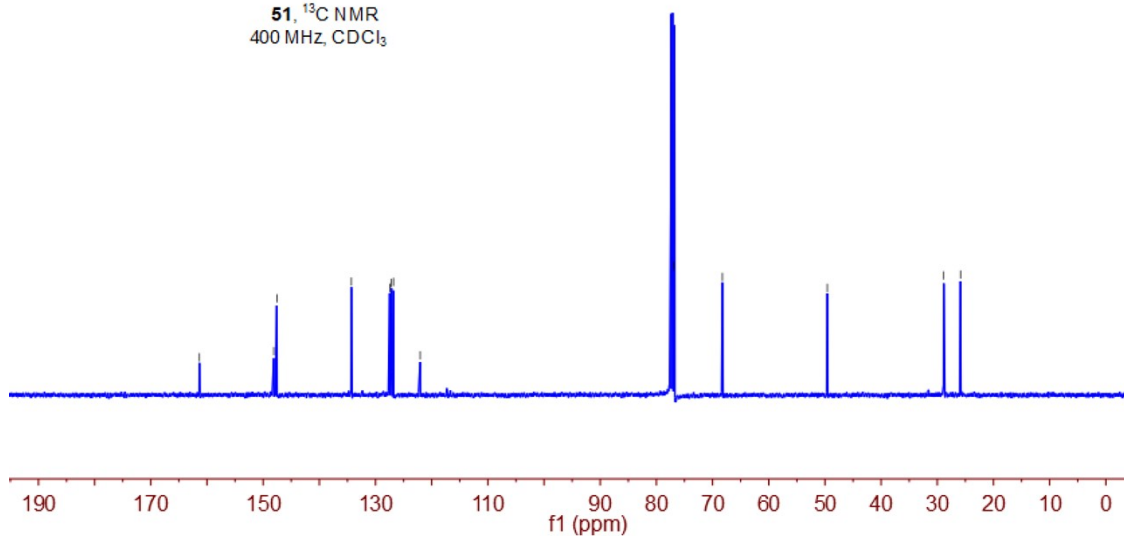

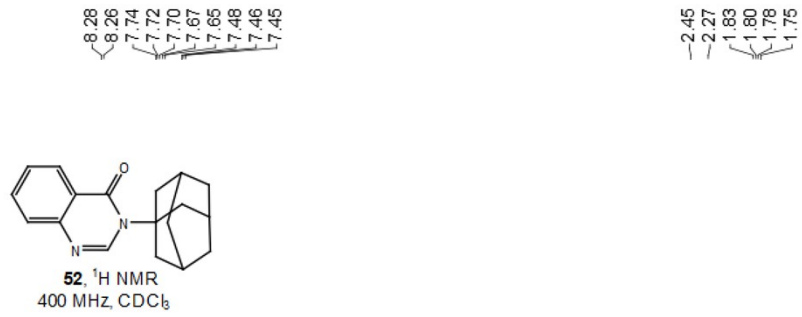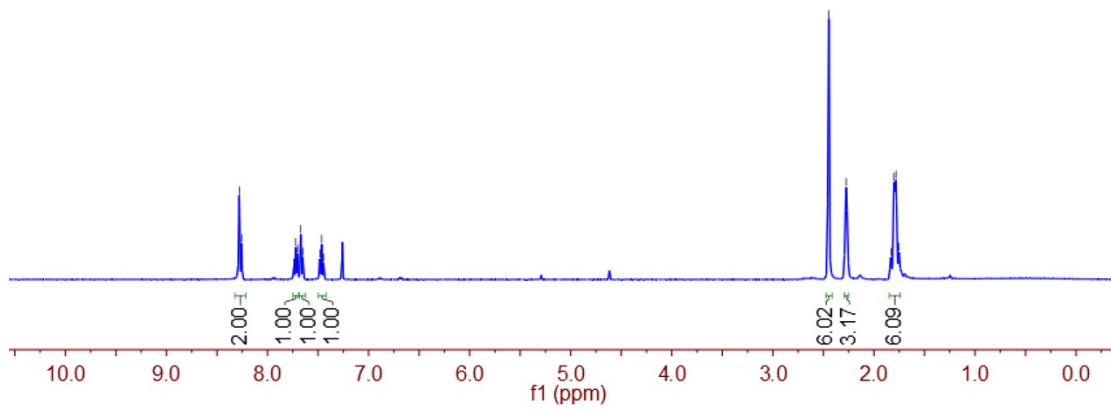

162.04, 146.76, 144.06, 134.03, 126.99, 126.81, 126.61, 123.18, 62.69, 39.96, 36.07, 30.08

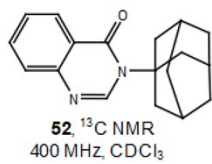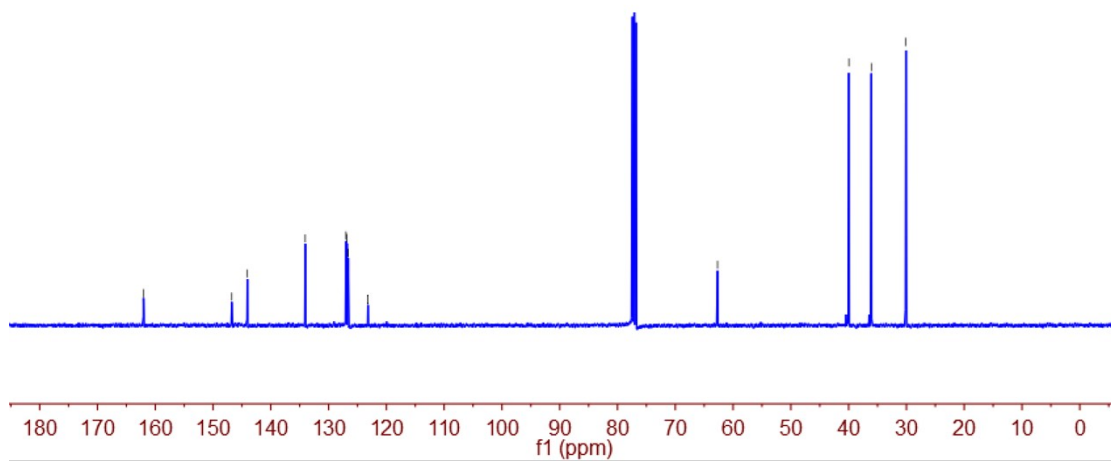



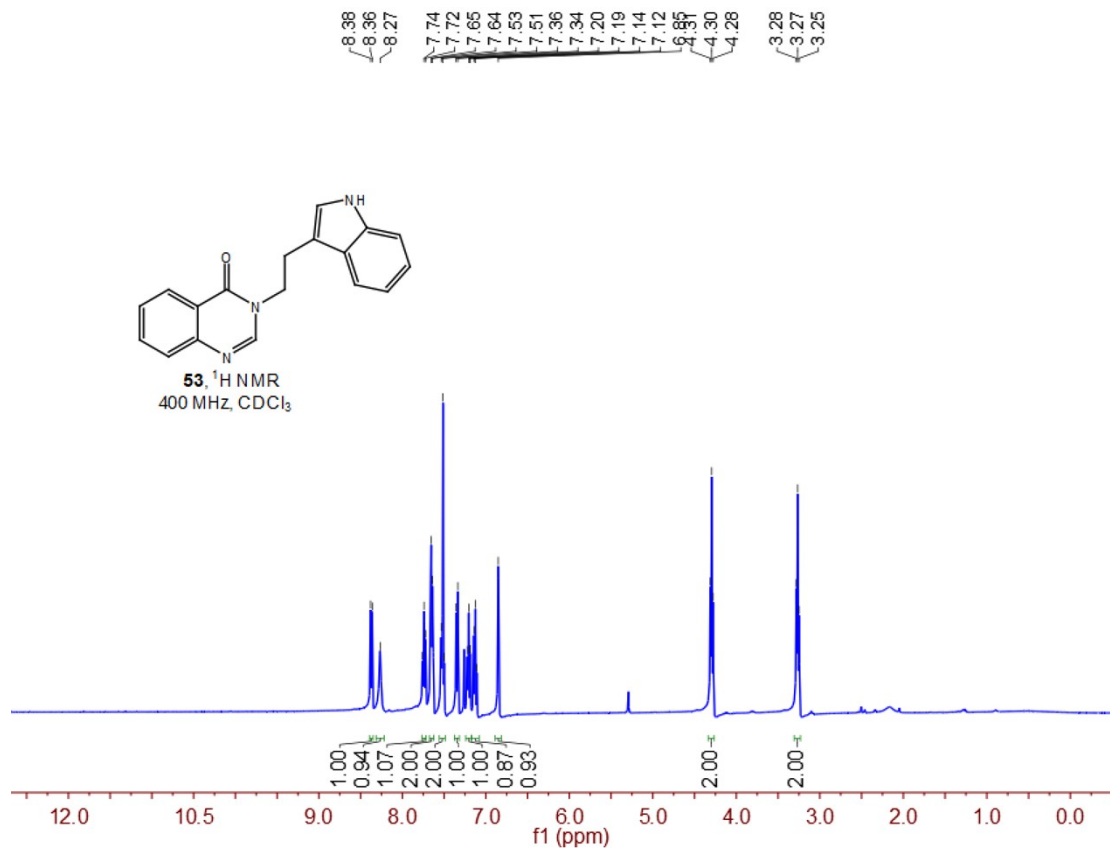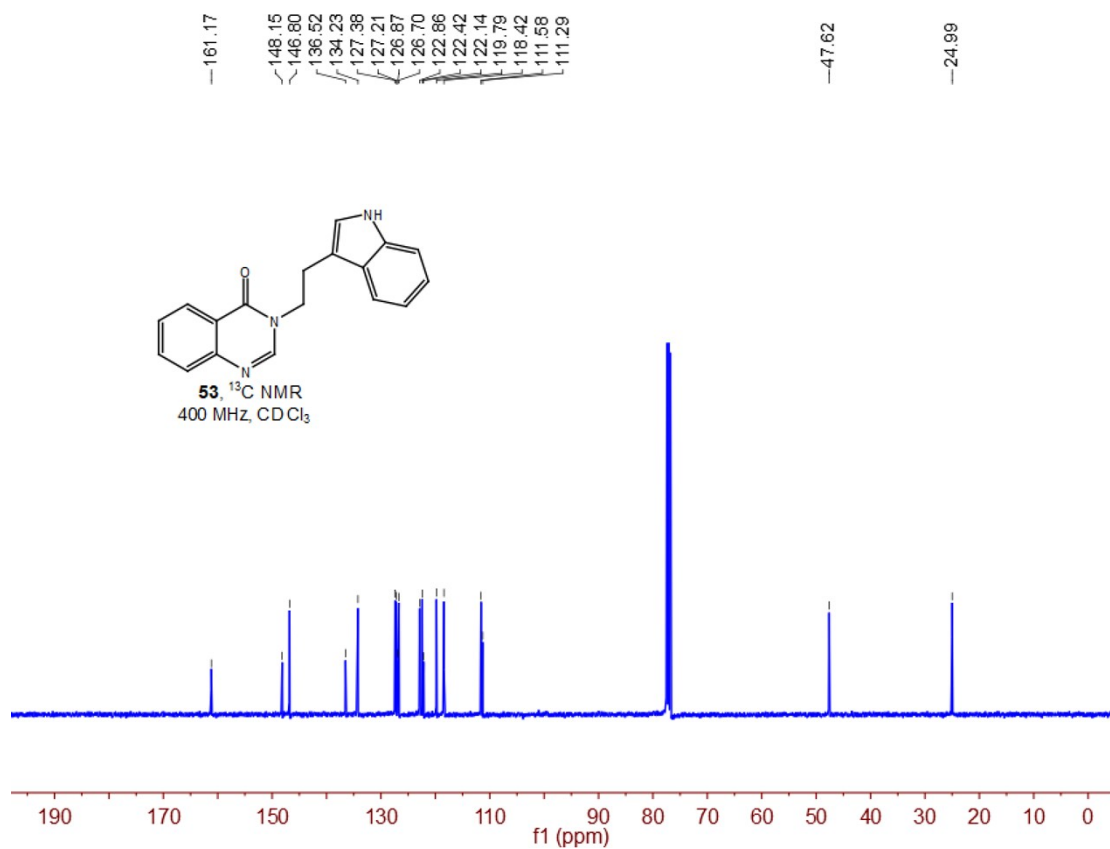

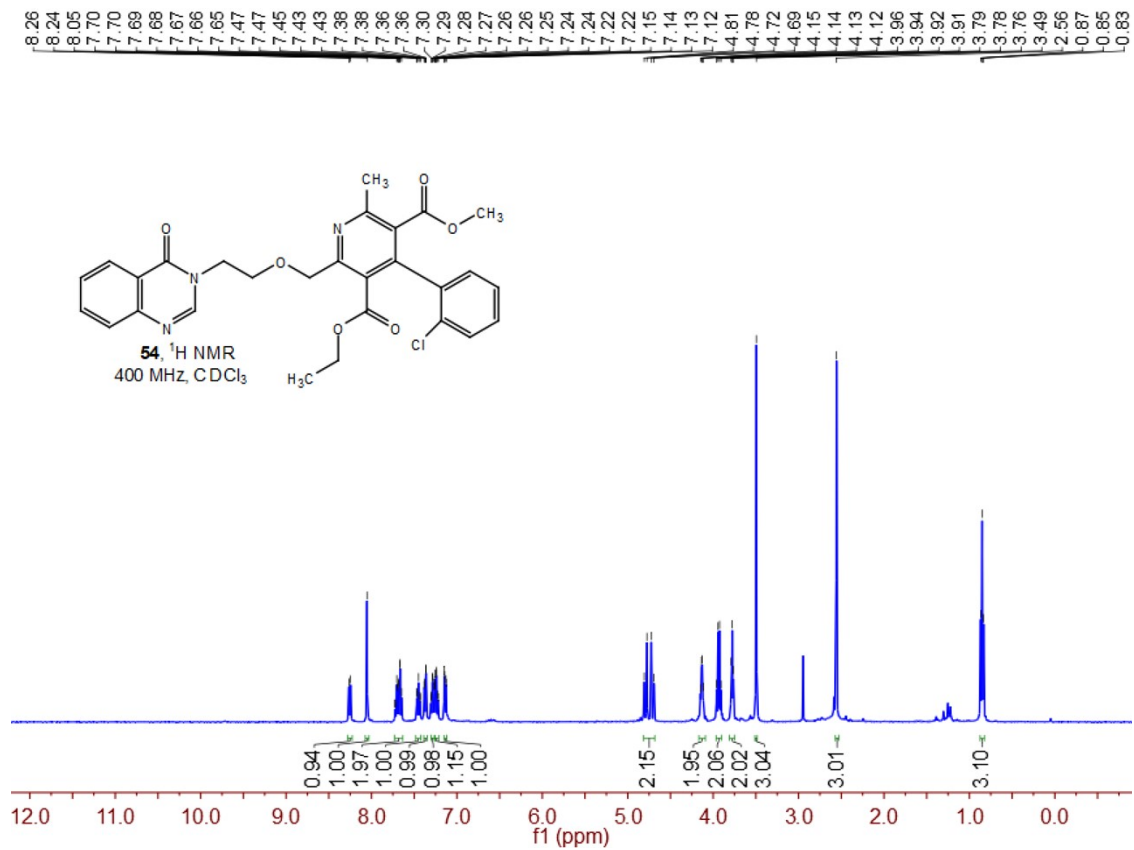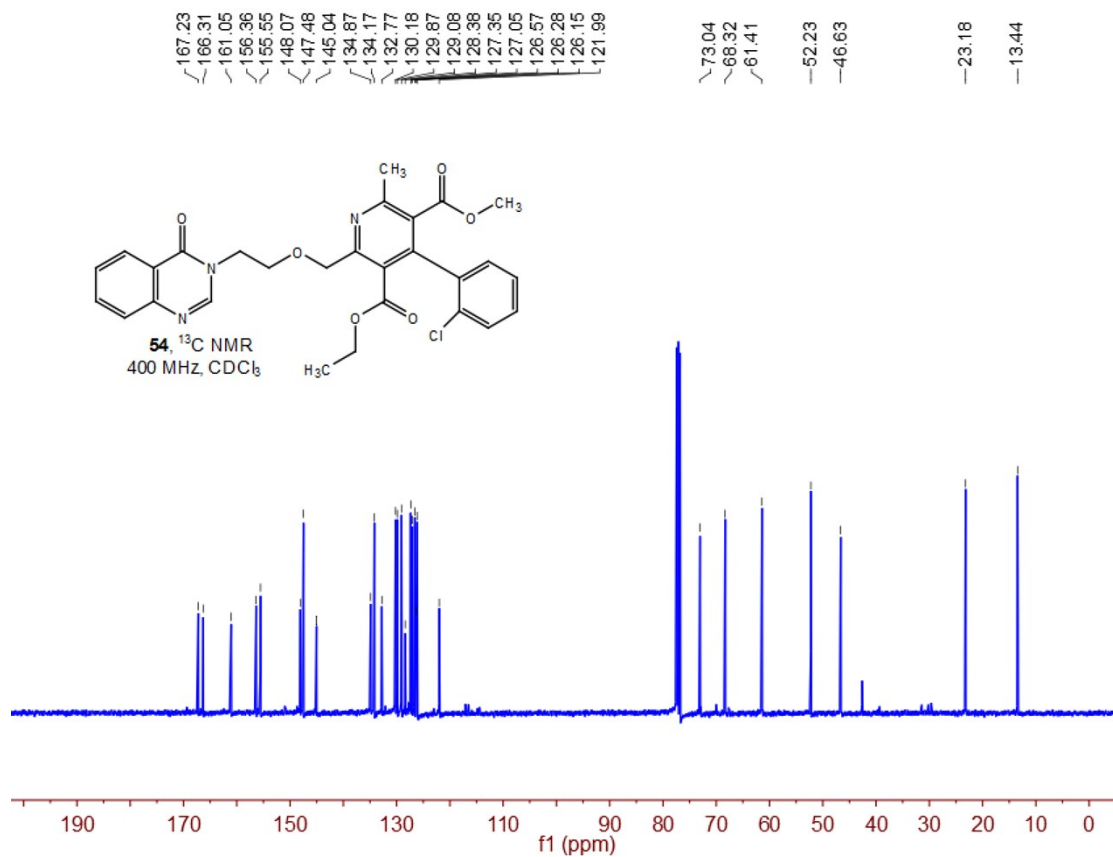

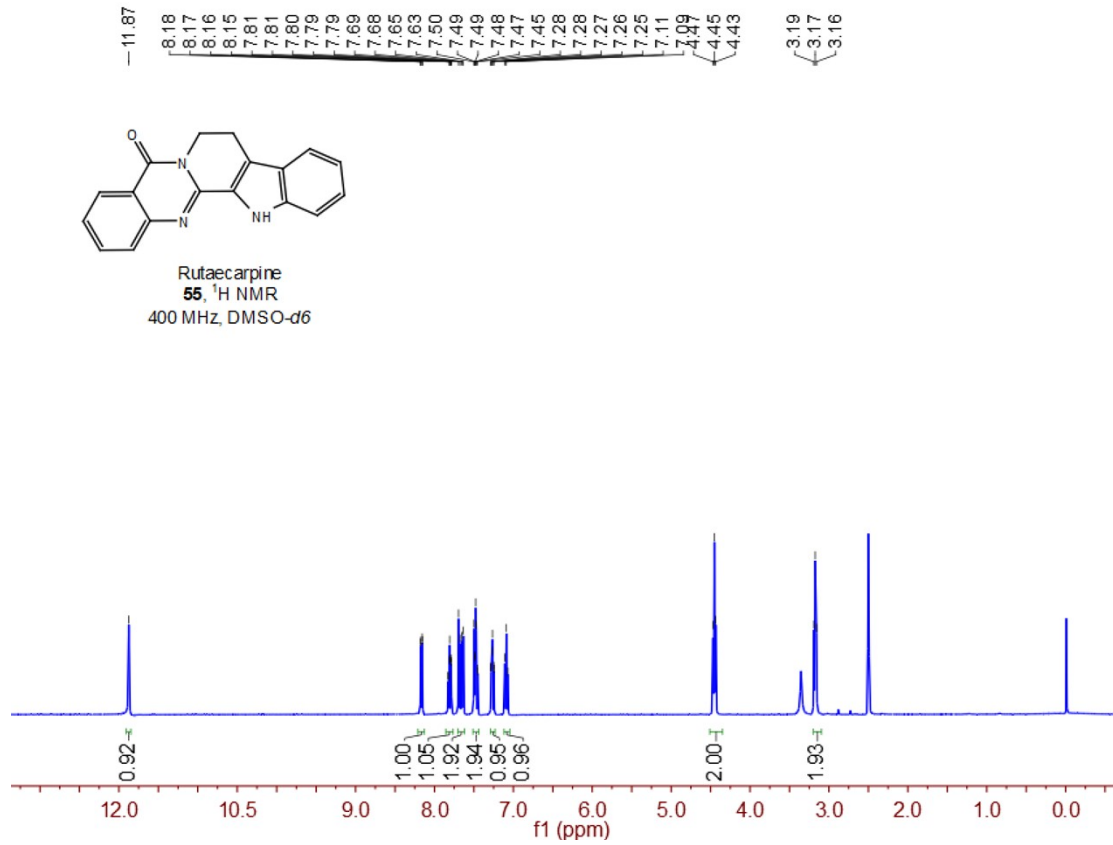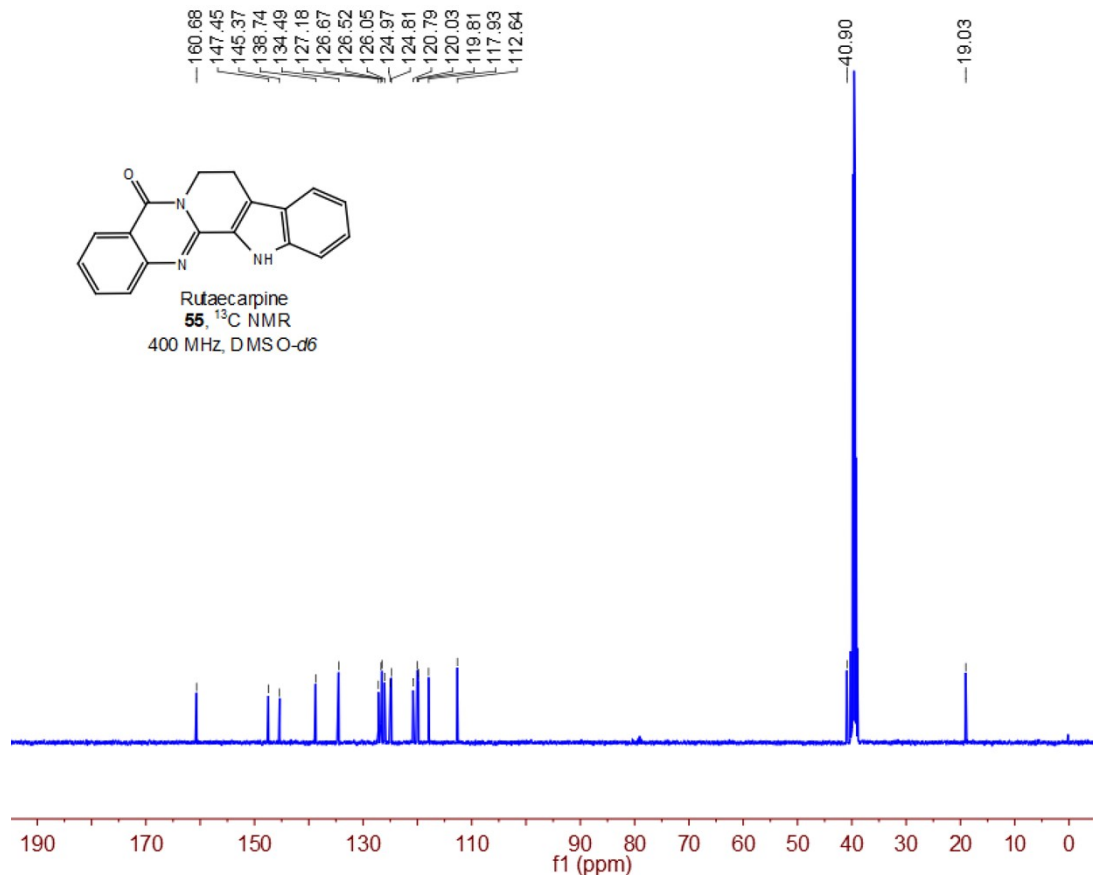

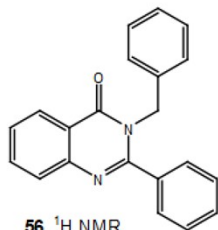

**56**,  $^1\text{H NMR}$   
400 MHz,  $\text{CDCl}_3$

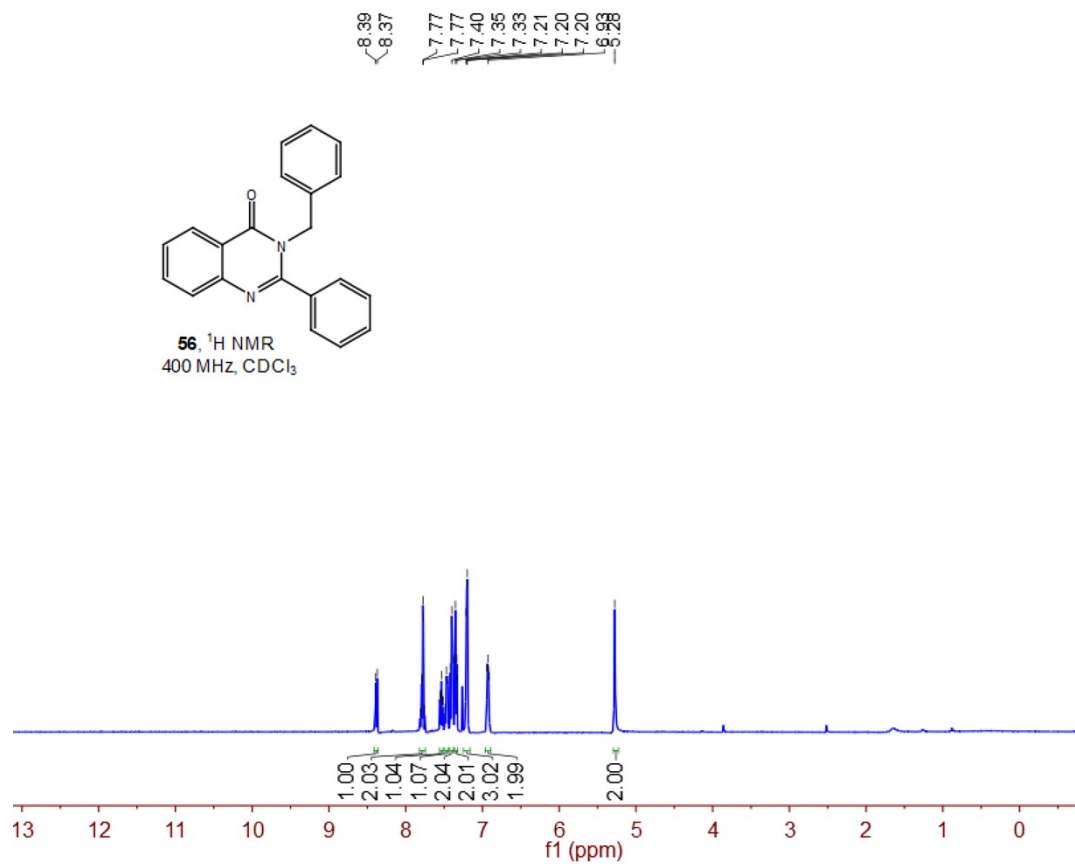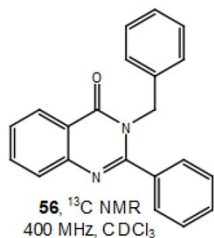

**56**,  $^{13}\text{C NMR}$   
400 MHz,  $\text{CDCl}_3$

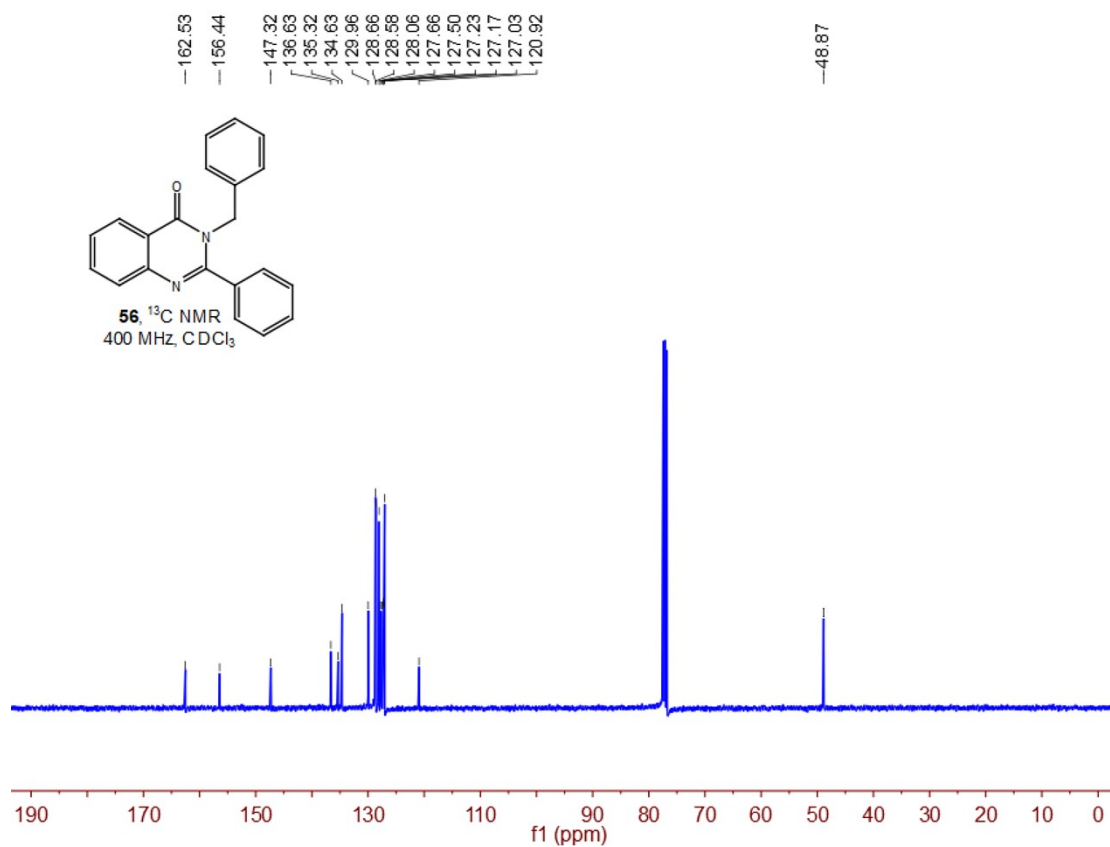

Supplement: d4gc04082a1.pdf [file d4gc04082a1.pdf]
